# Supplementary material for: Patient navigators facilitating access to primary care: a scoping review
Source: PubMed Central journal article supplement — BMJ Open. 2018 Mar 17;8(3):e019252. doi: 10.1136/bmjopen-2017-019252 (PMC5875656; doi:10.1136/bmjopen-2017-019252), 2018-03-17
Supplement: bmjopen-2017-019252.draft_revisions.pdf [file bmjopen-2017-019252.draft_revisions.pdf]

# BMJ Open

BMJ Open is committed to open peer review. As part of this commitment we make the peer review history of every article we publish publicly available.

When an article is published we post the peer reviewers' comments and the authors' responses online. We also post the versions of the paper that were used during peer review. These are the versions that the peer review comments apply to.

The versions of the paper that follow are the versions that were submitted during the peer review process. They are not the versions of record or the final published versions. They should not be cited or distributed as the published version of this manuscript.

BMJ Open is an open access journal and the full, final, typeset and author-corrected version of record of the manuscript is available on our site with no access controls, subscription charges or pay-per-view fees (<http://bmjopen.bmj.com>).

If you have any questions on BMJ Open's open peer review process please email [editorial.bmjopen@bmj.com](mailto:editorial.bmjopen@bmj.com)

# BMJ Open

## Patient navigators facilitating access to primary care: A scoping review

|                                 |                                                                                                                                                                                                                                                                                                                                         |
|---------------------------------|-----------------------------------------------------------------------------------------------------------------------------------------------------------------------------------------------------------------------------------------------------------------------------------------------------------------------------------------|
| Journal:                        | <i>BMJ Open</i>                                                                                                                                                                                                                                                                                                                         |
| Manuscript ID                   | bmjopen-2017-019252                                                                                                                                                                                                                                                                                                                     |
| Article Type:                   | Research                                                                                                                                                                                                                                                                                                                                |
| Date Submitted by the Author:   | 21-Aug-2017                                                                                                                                                                                                                                                                                                                             |
| Complete List of Authors:       | Peart, Annette; Monash University, Department of General Practice; Monash University<br>Lewis, Virginia; La Trobe University, Australian Institute for Primary Care and Aging<br>Brown, Ted; Monash University, School of Primary and Allied Health Care<br>Russell, Grant; Monash University, School of Primary and Allied Health Care |
| <b>Primary Subject Heading</b>: | General practice / Family practice                                                                                                                                                                                                                                                                                                      |
| Secondary Subject Heading:      | Patient-centred medicine                                                                                                                                                                                                                                                                                                                |
| Keywords:                       | Access to Health Care, Patient Navigation, Patient-Centred Care, PRIMARY CARE                                                                                                                                                                                                                                                           |
|                                 |                                                                                                                                                                                                                                                                                                                                         |

SCHOLARONE™  
Manuscripts

Only

## Title page

### Title of the article

Patient navigators facilitating access to primary care: A scoping review

### Corresponding author

Annette Peart

Southern Academic Primary Care Research Unit, Department of General Practice, School of Primary  
and Allied Health Care

Monash University

Building 1, 270 Ferntree Gully Road

Notting Hill, 3168, Australia

E-mail [annette.peart@monash.edu](mailto:annette.peart@monash.edu)

Telephone +61 3 9902 4899

Fax +61 3 9902 4300

### Co-authors

Virginia Lewis, Australian Institute for Primary Care & Ageing, La Trobe University, Bundoora,  
Australia

Ted Brown, Department of Occupational Therapy, Monash University, Frankston, Australia

Grant Russell, Southern Academic Primary Care Research Unit, Monash University, Notting Hill,  
Australia

1  
2  
3 **Key words**  
4

5 Access to health care, Patient navigation, Patient-centred care, Primary care  
6

7 **Word count**  
8

9  
10 3,224  
11  
12  
13  
14  
15  
16  
17  
18  
19  
20  
21  
22  
23  
24  
25  
26  
27  
28  
29  
30  
31  
32  
33  
34  
35  
36  
37  
38  
39  
40  
41  
42  
43  
44  
45  
46  
47  
48  
49  
50  
51  
52  
53  
54  
55  
56  
57  
58  
59  
60

## Abstract

### Objective

Patient navigators are a promising mechanism to link patients with primary care. While navigators have been used in population health promotion and prevention programs, their impact on access to primary care is not clear. The aim of this scoping review was to examine the use of patient navigators to facilitate access to primary care; how they were defined and described, their components, and the extent to which they were patient-centred.

### Setting and Participants

We used the Arksey and O'Malley scoping review method. Searches were conducted in MEDLINE, Embase, ProQuest Medical, other key databases, and grey literature, for studies reported in English from January 2000 – April 2016. We defined a patient navigator as a person or process creating a connection or link between a person needing primary care and a primary care provider. Our target population was people without a regular source of, affiliation or connection with primary care. Studies were included if they reported on participants who were connected to primary care by patient navigation, and attended or made an appointment with a primary care provider. Data analysis involved descriptive numerical summaries and content analysis.

### Results

Twenty studies were included in the final scoping review. Most studies referred to “patient navigator” or “navigation” as the mechanism of connection to primary care. As such, we grouped the components according to Freeman’s nine-principle framework of patient navigation. Seventeen studies included elements of patient-centred care: informed and involved patient, receptive and responsive health professionals, and a coordinated, supportive health care environment.

## Conclusions

Patient navigators may assist to connect people requiring primary care to appropriate providers and extend the concept of patient-centred care across different health care settings. Navigation requires further study to determine impact and cost-effectiveness, and explore the experience of patients and their families.

For peer review only

## Article summary

### Strengths and limitations of this study

- This is the first scoping review to explore how patient navigators are defined, described and used to facilitate access to primary care for people without an affiliation to a primary care provider.
- Comprehensive overview of sources covering peer-reviewed and grey literature
- Sources were included only if the outcome of the navigation was reported; sources describing patient navigation without reporting of outcomes were excluded
- Exploration of patient-centredness of the sources a unique addition to the descriptions of patient navigators.

## INTRODUCTION

Primary care is the first level of access to health care, delivered in the community most often by family physicians or general medical practitioners. However, not all people access primary care that best meets their health care needs, where and when they need it. Some people, such as those living in poverty, with a long-term disability, from a culturally and linguistically diverse background, or located in rural and remote areas, have difficulty accessing primary care services and resources<sup>1-4</sup>.

Access to health care is the opportunity to reach and obtain appropriate health care in situations of perceived need<sup>5</sup>. Access to primary care is important to reduce health care disparities, mortality, morbidity, hospitalisation rates, and health care costs<sup>6-9</sup>. Recent reforms to primary care have focused on trialling new processes and models of care to improve access<sup>10</sup>. These include integrated care models, after-hours telephone consultations, walk-in centres and nurse-led initiatives. However, disparities in care remain for many, such as people having low literacy and numeracy, cognitive deficits, being a member of a marginalized group or not understanding the need for primary care<sup>11</sup>.

A new approach to improve access to primary care is *patient navigation*, a process where a person (navigator) engages with a patient to determine barriers to care and provides information to improve access to components of the health system, not just primary care<sup>12</sup>. A patient navigator has been described as a type of 'broker', and the role includes a range of instrumental and relational functions and processes<sup>13 14</sup> to not only support patients to access primary care but directly identify providers willing to treat vulnerable people requiring care<sup>15</sup>. Originating in the 1990s, patient navigation developed as a strategy to reduce barriers to breast cancer care<sup>16</sup>. Patient navigators have been used for the screening of various cancers and through the cancer care continuum, with mixed success<sup>17-27</sup>.

Patient-centred care is a core element of primary care and facilitates access to appropriate care<sup>11</sup>. In primary care, patient-centred care consists of interactions and relationships between providers and patients to share information, explore values and preferences, facilitate access to appropriate care



1  
2  
3 and, address health care disparities<sup>28 29</sup>. There are over 25 proposed patient-centred care  
4  
5 frameworks or models in healthcare<sup>30</sup>. Epstein et al.<sup>11</sup> described three key factors that patient-  
6  
7 centred care relies on: an informed and involved patient, receptive and responsive health  
8  
9 professionals, and a coordinated, supportive health care environment.

10  
11 While navigators have been used in population health promotion and prevention programs<sup>31 32</sup>, their  
12  
13 impact on access to primary care is not clear<sup>33</sup>. Therefore, we performed a scoping review of the use  
14  
15 of patient navigation to facilitate access to primary care, and the extent to which identified  
16  
17 interventions were patient-centred.

## 21 METHODS

22  
23 We chose the scoping review method to map the extent, range and nature of published research on  
24  
25 the use of patient navigation to further understand how it links people to primary care<sup>34</sup>. When  
26  
27 compared to systematic reviews, scoping reviews address broader topics and are less reliant on  
28  
29 detailed research questions or quality assessments<sup>34</sup>. The work was structured around the five  
30  
31 stages of the Arksey and O'Malley framework: (1) identify the research question, (2) identify  
32  
33 relevant studies, (3) study selection, (4) chart the data, and (5) collate, summarize and report the  
34  
35 results. The review was also informed by Levac et al's.<sup>35</sup> refinements to Arksey and O'Malley's  
36  
37 framework.

### 41 Stage 1: Identify the research question

42  
43 Patient navigation has been defined as a "process, by which an individual, a patient navigator, guides  
44  
45 patients in overcoming barriers to health care services access to facilitate timely access to care"<sup>36</sup>.

46  
47 We expanded this definition to include a patient navigator as a person or process creating a  
48  
49 connection or link between a person needing primary care and a primary care provider.

50  
51  
52 Our target population was people without a regular source of or affiliation or connection with  
53  
54 primary care. The outcomes of interest were the person needing care attended an appointment or  
55  
56  
57  
58  
59  
60

1  
2  
3 made contact with the referred primary care provider. These definitions helped us to clarify the  
4 focus of the review, confirm the inclusion criteria adopted and establish parameters for the search  
5 strategy<sup>35</sup>. We asked three questions to guide the scoping review:  
6  
7

- 8  
9  
10 1. How have patient navigators been defined and described in connecting people to primary  
11 care?  
12
- 13  
14 2. What are the components of the patient navigation programs?  
15
- 16  
17 3. To what extent has patient-centredness been incorporated into the design, implementation  
18 and analysis of patient navigation programs?  
19

## 20 21 **Stage 2: Identify relevant studies**

22  
23 We identified relevant studies through a search of electronic databases, grey literature, and  
24 reference lists of key articles sourced (Supplementary File 1).  
25

26  
27  
28 A three-step search strategy was used. Firstly, we undertook an initial limited search of MEDLINE,  
29 Embase and CINAHL using terms and variants of “navigator”, “broker”, “link worker” and  
30 “community health worker”. We analysed the text in the titles and abstracts of retrieved studies and  
31 index terms used to refine key terms. The terms most common were related to *navigation*, *linkage*,  
32 and *access to care*. We completed a second search of the same databases and extended the search  
33 to include related medical and social science databases and grey literature using the key terms and  
34 variants (Table 1) identified by the initial search strategy (Supplementary File 2).  
35  
36  
37  
38  
39  
40  
41  
42  
43  
44  
45  
46  
47  
48  
49  
50  
51  
52  
53  
54  
55  
56  
57  
58  
59  
60

Table 1: Key search terms

| Concept, program or intervention | Outcomes of intervention      |
|----------------------------------|-------------------------------|
| Navigator/navigation             | Community health              |
| Patient navigator/navigation     | Family practice/practitioner  |
| Peer navigator/navigation        | General practice/practitioner |
| Broker                           | Primary care                  |
| Health broker                    | Primary health care           |
| Health services broker           |                               |
| Community health worker          |                               |
| Community navigator/navigation   |                               |
| Lay health worker                |                               |
| Linkage to care                  |                               |

Finally, we checked the reference lists of all identified studies (and their citations) for additional studies.

### Stage 3: Study selection

Inclusion criteria were applied as a basis for which studies were considered relevant to the review questions. Studies were included if they:

- Were published in English from January 2000-May 2016. The start date of 2000 was chosen as reforms of primary care commenced around this time<sup>37</sup> along with the emergence of navigator-type approaches<sup>38</sup>;
- Reported on patients who did not have a regular source of primary care (provider or practice);
- Connected patients to primary care by a process (for example, navigation) or a person (for example, navigator); and,

- Reported an outcome of patients attending or making at least one appointment with primary care providers.

We excluded studies if they originated in countries who were not members of the Organisation for Economic Cooperation and Development (OECD), as their primary care systems differ significantly from those of OECD countries. Other exclusion criteria were applied to studies where:

- Patients lived in residential care, or incarcerated with no imminent release date, as their primary care needs were assumed to be met by institutional providers;
- A navigator was attached to a primary care provider or practice as this indicated the patient was already connected to primary care; and,
- A navigator referred patients to health screening or assessment services only, and not to a primary care provider.

The first author reviewed titles and abstracts of studies, and GR independently reviewed abstracts where there was uncertainty for inclusion.

#### **Stage 4: Chart the data**

Data extracted was entered into a form developed in Microsoft Excel specifically for this review.

Information on authors, year of publication, study location and context, aims or purpose of the research, study type or design, population and sample size, methodology, conceptual model,

intervention type and duration, measures used, and key findings were recorded on this form. We

also extracted data relevant to the research questions: definitions and descriptions of navigators,

components of navigator programs, and elements of patient-centred care. Charting the data was an

iterative process<sup>35</sup> that we updated as studies revealed useful data categories. Studies were

reviewed a number of times to ensure all relevant data was captured.

### Stage 5: Collate, summarize and report the results

We analysed the data using descriptive numerical summaries and content analysis of the text. This helped to highlight the major themes and report the results in relation to the review questions.

## RESULTS

Our initial search terms generated 6,355 records from electronic databases and grey literature. We removed 664 duplicates, leaving 5,691 records to be screened. Of these, 5,613 records were excluded based on the title and/or abstract review, as they were not relevant to the question or originated in non-OECD countries. Of the remaining 78 records, full-text review excluded 44 where participants were not linked to primary care and 16 where participants already had a primary care provider or did not indicate a need for primary care. We searched references and citations of the remaining 18 records, adding two additional studies. This resulted in 20 selected for inclusion in the scoping review. The selection process is shown in the flow chart (Figure 1).

Of the 20 included studies, three reported on the same randomized controlled trial at different phases<sup>39-41</sup>. These three studies were counted as unique studies as each reported on different elements of the same trial: preliminary findings, qualitative analysis of interviews, and longitudinal findings.

Eleven studies were descriptions or evaluations of programs, eight were intervention studies, and one was a retrospective study. Thirteen were programs based in emergency departments, six were community-based programs, and one was delivered in an inpatient setting. All studies were conducted in the United States. Table 2 outlines characteristics of the included studies.

Table 2 Characteristics of included studies

| Author               | Context                                                                       | Study type                        | Population and sampling                                                                                                | Description                                                                                                                                                                                                                                                     |
|----------------------|-------------------------------------------------------------------------------|-----------------------------------|------------------------------------------------------------------------------------------------------------------------|-----------------------------------------------------------------------------------------------------------------------------------------------------------------------------------------------------------------------------------------------------------------|
| Bishop <sup>42</sup> | Homeless shelter                                                              | Description                       | Homeless people attending health fair at shelter or soup kitchen                                                       | <i>Volunteer navigator</i> completed short training course, engaged person by building relationships, assessed needs, guided to providers, translated confusing information, coordinated follow-up, empowered people to understand health system and self-care. |
| Chan <sup>43</sup>   | Emergency department in area served by 3 community-based primary care clinics | Non-randomized, non-blinded trial | Patients assessed by emergency physician to benefit from clinic follow-up within 14 days (n=326)                       | <i>Internet-based referral system</i> between emergency department electronic medical record and clinic appointment systems. System accessed clinic availability and allowed emergency physicians to give patients follow-up appointments at clinics.           |
| Doran <sup>44</sup>  | Emergency department                                                          | Quasi-experimental trial          | Adults with low-acuity problems assigned to intervention or usual care based on where care expected to result in least | <i>Patient navigator</i> escorted patients from emergency waiting room to clinic in same building. Patients assigned physician who addressed current problems and established care plan and given card with physician's name and clinic telephone number.       |

1  
2  
3  
4  
5  
6  
7  
8  
9  
10  
11  
12  
13  
14  
15  
16  
17  
18  
19  
20  
21  
22  
23  
24  
25  
26  
27  
28  
29  
30  
31  
32  
33  
34  
35  
36  
37  
38  
39  
40  
41  
42  
43  
44  
45  
46  
47

|                           |                                             |                             |                                                                                                               |                                                                                                                                                                                                                                                                                      |
|---------------------------|---------------------------------------------|-----------------------------|---------------------------------------------------------------------------------------------------------------|--------------------------------------------------------------------------------------------------------------------------------------------------------------------------------------------------------------------------------------------------------------------------------------|
|                           |                                             |                             | delay (n=965)                                                                                                 |                                                                                                                                                                                                                                                                                      |
| Elliott <sup>45</sup>     | Emergency department                        | Retrospective               | Patients discharged and referred to transitional care clinic; randomly sampled for record abstraction (n=660) | <i>Transitional care clinic</i> staff worked with patients to determine preferences and locate convenient, appropriate provider and made new appointment with chosen provider.                                                                                                       |
| Gany <sup>46</sup>        | JFK International Airport                   | Description                 | Convenience sample of taxi drivers waiting in airport holding lot (n=466)                                     | Health care access and <i>case management</i> to link taxi drivers to health insurance enrolment and providers.                                                                                                                                                                      |
| Griswold <sup>39-41</sup> | Comprehensive Psychiatric Emergency Program | Randomized controlled trial | Adults with psychiatric disorder (n=101-175)                                                                  | <i>Care navigator</i> trained in interviewing and case management provided information about low-cost care; facilitated access, reinforced patient education, information to providers about patient's history, follow-up, peer connections to access community and social services. |
| Horwitz <sup>47</sup>     | Level 1 urban trauma centre                 | Randomized study            | Uninsured adults (n=230)                                                                                      | <i>Health Promotion Advocates</i> in emergency department assisted patients to choose provider, gave brochure,                                                                                                                                                                       |

|                       |                                    |                                                    |                                                                                          |                                                                                                                                                                                                                              |
|-----------------------|------------------------------------|----------------------------------------------------|------------------------------------------------------------------------------------------|------------------------------------------------------------------------------------------------------------------------------------------------------------------------------------------------------------------------------|
|                       |                                    |                                                    |                                                                                          | faxed information to case worker at selected clinic.                                                                                                                                                                         |
|                       |                                    |                                                    |                                                                                          | Clinic case worker contacted patient to make appointment.                                                                                                                                                                    |
| Kahn <sup>48</sup>    | Medicaid managed care organisation | Evaluation                                         | New members completing mailed survey (n=368)                                             | <i>Telephone case managers</i> made at least three contact attempts to ensure linkage to provider.                                                                                                                           |
| Kangovi <sup>49</sup> | 2 teaching hospitals               | Two-armed, single-blind, randomized clinical trial | Newly-admitted inpatients randomly numbered, approached until 3 per day enrolled (n=446) | <i>Community health workers</i> (trained lay people of similar backgrounds to patients, selected based on personality traits patients identified as important) set goals, supported goal achievement, connected to provider. |
| Kim <sup>50</sup>     | 5 hospital emergency departments   | Evaluation                                         | Merged data set (hospital discharge, clinic, navigator referral data) (n=10,761)         | <i>Patient navigators</i> of various backgrounds based in clinics or hospitals spoke with or telephoned patients referred by emergency providers.                                                                            |
| Marr <sup>51</sup>    | Emergency department               | Evaluation                                         | Patients approached by navigator (n=7,185)                                               | <i>Patient navigator</i> recruited from community, trained in emergency department, visited patients waiting for medical care or before discharge, offered referral within 19-clinic system.                                 |



1  
2  
3  
4  
5  
6  
7  
8  
9  
10  
11  
12  
13  
14  
15  
16  
17  
18  
19  
20  
21  
22  
23  
24  
25  
26  
27  
28  
29  
30  
31  
32  
33  
34  
35  
36  
37  
38  
39  
40  
41  
42  
43  
44  
45  
46  
47

|                          |                                                             |             |                                                                                                                    |                                                                                                                                                                                                                                                                                                                |
|--------------------------|-------------------------------------------------------------|-------------|--------------------------------------------------------------------------------------------------------------------|----------------------------------------------------------------------------------------------------------------------------------------------------------------------------------------------------------------------------------------------------------------------------------------------------------------|
| Overholser <sup>52</sup> | Specialist outpatient clinics of tertiary teaching hospital | Description | Patients with sickle cell disease referred by specialists (n=21)                                                   | <i>Patient navigators</i> of various backgrounds trained in navigation proactively sought local providers and established network through outreach, made appointments with patients, sent reminders, educated on importance of primary care.                                                                   |
| Treadwell <sup>53</sup>  | Community centre                                            | Evaluation  | African American men at risk for or diagnosed with diabetes or in poor health; recruited at community event (n=42) | 6-week community-based, culturally-responsive, gender-specific health prevention program delivered by <i>community health workers</i> , trusted community members provided links between health system and community.                                                                                          |
| Wang <sup>36</sup>       | Ethnically-diverse community health centre                  | Evaluation  | Patients with diabetes and/or hypertension not seen by provider in 6 months (n=215)                                | <i>Patient navigator</i> trained in chronic illness education, motivational interviewing, appointment scheduling. Telephoned patients, built rapport, educated patients, made appointment with provider, assessed need for specialist referrals, identified barriers to access, assisted to overcome barriers. |

|                                                                         |                                                                       |                                               |                             |                                                                                                           |                                                                                                                                                                                                                                                                              |
|-------------------------------------------------------------------------|-----------------------------------------------------------------------|-----------------------------------------------|-----------------------------|-----------------------------------------------------------------------------------------------------------|------------------------------------------------------------------------------------------------------------------------------------------------------------------------------------------------------------------------------------------------------------------------------|
| 1<br>2<br>3<br>4<br>5<br>6<br>7<br>8<br>9<br>10<br>11<br>12<br>13<br>14 | Wexler <sup>54</sup>                                                  | Emergency department                          | Randomized controlled trial | Patients whose physician confirmed visit non-urgent, completed baseline survey, randomly assigned (n=148) | <i>Emergency department electronic medical record to make appointment at clinic based on patient location and preference. Patient given appointment reminder card and directions to clinic. Electronic message to clinic with information about patient and appointment.</i> |
| 15<br>16<br>17<br>18<br>19<br>20<br>21<br>22<br>23                      | ED navigators connect patients to better venues of care <sup>55</sup> | Emergency departments of 8-hospital system    | News article                | Health plan members with non-urgent problems                                                              | <i>Navigator with customer service background assigned members to provider and made appointments.</i>                                                                                                                                                                        |
| 24<br>25<br>26<br>27<br>28<br>29<br>30<br>31                            | Navigator reduces readmissions, inappropriate ED visits <sup>56</sup> | Emergency department                          | News article                | Patients with non-urgent problems                                                                         | <i>Community health outreach coordinator/navigator of varying cultures representing patients served. Met patient in emergency department, coordinated appointments, and set patients up in medical homes.</i>                                                                |
| 32<br>33<br>34<br>35<br>36<br>37<br>38                                  | ED navigators help patients find a PCP <sup>57</sup>                  | Small community hospital emergency department | News article                | Patients admitted through emergency department and patients not admitted                                  | <i>Navigator worked with patients to discuss discharge and help facilitate follow-up appointments.</i>                                                                                                                                                                       |

### **Patient navigators: Definition and descriptions**

One study defined patient navigation as a “process, by which an individual, a Patient Navigator, guides patients in overcoming barriers to health care services access to facilitate timely access to care”<sup>36</sup>.

The studies provided either a description of a navigator (person) or, for three of the studies, navigation process<sup>43 45 54</sup>. Descriptions varied in detail and often consisted of the type of person recruited as a navigator, the tasks they performed, and the training provided (Table 2).

### **Patient navigation program components**

All of the studies outlined components of their programs; four provided detailed descriptions<sup>39-41 49</sup>.

We grouped components according to Freeman’s consensus-based nine-principle framework of patient navigation, originally developed in response to the expansion of patient navigation as a community-based intervention<sup>16 58 59</sup>. These principles have been widely used in patient navigation programs. Each of these principles is outlined below with examples from the studies selected that included sufficient information to inform each principle in the framework.

#### *Principle 1: Patient-centred health care service delivery model*

Seventeen of the studies outlined aspects of patient-centred care. This will be discussed further in the section addressing research question three.

#### *Principle 2: Integration of a fragmented healthcare system*

This principle relates to a patient experiencing a seamless, timely flow through the continuum of care<sup>16</sup>. We also included another principle (*Principle 8: Connect disconnected health care systems*) here, as the two are similar concepts and this has been done previously<sup>60</sup>. We focused on connections to primary care, not on a continuum of care through stages of illness or disease. Two examples of integration in our scoping review were assisting patients to understand the entire

1  
2  
3 health system<sup>42</sup>, and linking the emergency department with a primary care provider, as well as to  
4  
5 community dental, mental health, substance abuse and other social services<sup>51</sup>.

6  
7  
8 In addition, key stakeholders (including potential participants) were engaged through health fairs<sup>42</sup>,  
9  
10 teaching emergency department physicians to use a new health information technology system<sup>43</sup>,  
11  
12 and clinics increasing capacity and expanding hours<sup>50</sup>.

### 13 14 15 *Principle 3: Elimination of barriers*

16  
17 This principle is most effectively carried out through relationships with patients<sup>16</sup>. While removing  
18  
19 barriers to accessing primary care appears implicit in a navigator program, not all studies provided  
20  
21 detail of what the barriers were and how they were addressed. One exception of note is the *Step on*  
22  
23 *It!* intervention at JFK International Airport, which focused on the barriers taxi drivers faced. This  
24  
25 intervention went to the airport holding lot, assisted drivers to locate providers with flexible hours,  
26  
27 culturally and linguistically appropriate models of care, and at low-cost<sup>46</sup>. Another study described a  
28  
29 program that helped adults with sickle cell disease find primary care<sup>52</sup>. The barriers addressed  
30  
31 included patients not understanding why they needed a primary care provider when they already  
32  
33 had a specialist, low literacy, difficulty filling out forms and forgetting appointments. These  
34  
35 navigators used motivational interviewing to identify further barriers and help patients set priorities  
36  
37 beyond accessing primary care<sup>52</sup>.

### 38 39 40 41 *Principle 4: Clear scope of practice*

42  
43 Three studies provided detail about the role and responsibilities of the navigator<sup>36 49 52</sup>. The most  
44  
45 detailed of these was a randomized clinical trial by Kangovi et al.<sup>49</sup>, providing a website link  
46  
47 (<http://chw.upenn.edu>) containing protocols for recruitment, training and standardized work  
48  
49 practices for navigators, organisational directors and managers.

50  
51  
52 Kangovi et al.<sup>49</sup> created a community health worker model and tested its effect on post-hospital  
53  
54 outcomes among general medical inpatients. This was based on qualitative participatory action  
55  
56  
57  
58  
59  
60

1  
2  
3 research and had detailed protocols including standardized work practices in three stages: goal  
4 setting, goal support, and connection with primary care. A substantial component was to build  
5 relationships with patients to help set goals for recovery, develop an individualized action plan, and  
6 liaise between the patient and inpatient care team. The worker provided tailored support based on  
7 the patient goals. Patients were connected to primary care and coached to make and attend  
8 appointments independently. Provider resources included a discharge summary and the patient's  
9 action plan taken to the appointment.  
10  
11  
12  
13  
14  
15  
16

17  
18 *Principle 5: Cost-effective*  
19

20 None of the studies evaluated the cost-effectiveness of their program.  
21  
22

23 *Principle 6: Defined level of skill*  
24

25 Nine studies provided information on the skill level required of the navigators<sup>39 42 49-53 55</sup>. This ranged  
26 from volunteers with in-house training, staff with customer service backgrounds, to college-  
27 accredited navigators. They were trained on topics such as navigation processes, disease-specific  
28 content such as diabetes education, or motivational interviewing. Similarly, seven studies presented  
29 ways in which development of resources informed the intervention. These included a needs  
30 assessment<sup>42 56</sup>, software development<sup>43</sup>, community-based participatory action research<sup>46 49 53</sup> and  
31 provider collaboration to develop and test navigation mechanisms<sup>51</sup>.  
32  
33  
34  
35  
36  
37  
38  
39  
40

41 *Principle 7: Defined beginning and end*  
42

43 Eleven studies outlined definite points at which navigation began and ended<sup>36 43-47 49 51 54 56 57</sup>. Entry  
44 usually involved meeting a patient (in the emergency department or on a hospital ward, for example)  
45 to schedule an appointment. End points of the interventions included "patient has an appointment  
46 made" or "patient sees provider".  
47  
48  
49  
50  
51  
52  
53  
54  
55  
56  
57  
58  
59  
60

1  
2  
3 *Principle 8: Connect disconnected healthcare systems*

4  
5 This principle was combined with a similar principle, (*Principle 2 Integration of a fragmented*  
6  
7 *healthcare system*) for the purposes of this review.  
8

9  
10 *Principle 9: Coordinated system*

11  
12 This principle relates to having an assigned coordinator to oversee all aspects of the intervention<sup>16</sup>.

13  
14 This was evident in two studies: where navigators served as executive officers on a governing  
15  
16 board<sup>42</sup> and were supervised by a social worker as well as having weekly team meetings<sup>49</sup>.  
17

18  
19 **Patient navigation: patient-centredness**

20  
21 Our third question for this review was, 'To what extent has patient-centredness been incorporated  
22  
23 into the design, implementation and analysis of patient navigation programs?' We focused on the  
24  
25 three factors upon which patient-centred care depends: informed and involved patient, receptive  
26  
27 and responsive health professionals, and a coordinated, supportive health care environment<sup>11</sup>.  
28

29  
30 Seventeen studies included at least one of the three factors. Table 3 indicates the number of studies  
31  
32 and some examples of approaches to patient-centred care for each of the three factors. The  
33  
34 columns of the table indicate whether patient-centredness was included in the design,  
35  
36 implementation, or analysis phase of patient navigation programs.  
37  
38  
39  
40  
41  
42  
43  
44  
45  
46  
47  
48  
49  
50  
51  
52  
53  
54  
55  
56  
57  
58  
59  
60

Table 3 Examples of patient-centredness

| Patient-centred care factor                     | Design phase examples                                                                                                                           | Implementation phase examples                                                                                                                        | Analysis phase examples                                                                                                   | Total studies* |
|-------------------------------------------------|-------------------------------------------------------------------------------------------------------------------------------------------------|------------------------------------------------------------------------------------------------------------------------------------------------------|---------------------------------------------------------------------------------------------------------------------------|----------------|
| Patients informed and involved in their care    | 2 studies: user-friendly and culturally-sensitive health materials; bilingual, bicultural community members                                     | 17 studies: information to patient on difference between emergency and primary care; identified barriers to access and help to overcome barriers     | 0 studies                                                                                                                 | 19             |
| Receptive and responsive health professionals   | 3 studies: clinics added capacity for walk-in appointments, navigator visited clinics to provide information and establish working relationship | 6 studies: after connection, navigator worked with provider to schedule other visits as per care plan; assisted with patient education and follow-up | 2 studies: providers wanted to continue in program; information to providers more complete and accessible than previously | 11             |
| Coordinated, supportive health care environment | 4 studies: Collaborative organisation linked emergency department with 18 clinics; each hospital adopted unique                                 | 1 study: emergency physicians encouraged to establish relationships with clinics                                                                     | 1 study: community mobilized around population health issues through increased local media attention                      | 6              |

|  |                                      |  |  |  |
|--|--------------------------------------|--|--|--|
|  | provider arrangement<br>and approach |  |  |  |
|--|--------------------------------------|--|--|--|

\*Some studies included more than one instance of the patient-centred factor in more than one phase of the intervention

Of note, the Kangovi et al.<sup>49</sup> study had an explicit patient-centred focus. The intervention prioritised relationship building with patients through goal setting and development of action plans, liaising with inpatient staff to ensure the patient's goals were at the forefront, and giving the action plan to a provider the patient chose based on needs and preferences.

Similarly, in the three studies reporting the same randomized controlled trial, Griswold et al.<sup>39-41</sup> used a care navigator to connect patients with a history of psychiatric crisis to primary care. The navigator built relationships by meeting with patients routinely while admitted and also at primary care appointments, and maintaining regular contact via phone or in person. The navigator would take the patient to the appointment and reinforce any education provided. Patients were informed of low-cost clinics and further assistance was provided through coordinating follow-up and connecting patients to peer and social services. Provider resources included information to clinics on discharge diagnosis, medications and mental health treatment site referral.

Other studies included the three factors yet did not explicitly state patient-centredness as a driver.

## DISCUSSION

Our scoping review identified 20 studies that described patient navigation to connect patients to primary care. Most programs had components that could be included in a framework of patient navigation, and 17 of the 20 studies included factors inherent to patient-centred care in their design, implementation or analysis. Patients were almost always connected to primary care by a patient navigator (person), indicating a relational approach to making the connection is key.



1  
2  
3 The level of detail in descriptions of the studies varied; this variation has been reported elsewhere<sup>61</sup>.  
4  
5 This presents challenges in clearly characterizing navigators and understanding what they do.  
6  
7 Similarly, while there is no generally accepted definition of patient navigation, there is a call for  
8  
9 descriptions of the tasks navigators do and the networks of contacts they use to support their  
10  
11 actions<sup>61</sup>.  
12

13  
14 Generally, programs adhered to published criteria for patient-centred care<sup>11</sup>. Although not overtly  
15  
16 stated as an aim, almost all studies incorporated at least one of the three patient-centred care  
17  
18 factors: an informed and involved patient, receptive and responsive health professionals, and a  
19  
20 coordinated, supportive health care environment. We found these mostly in the implementation of  
21  
22 the programs, to a lesser degree in the design phase and mentioned in only three studies in the  
23  
24 analysis. Our assertion that a navigator is patient-centred focusing on connections and relationships  
25  
26 has some merit.  
27

28  
29 This scoping review has several limitations. Although a scoping review is iterative and involves  
30  
31 revisiting the research question and key terms during searches, our search strategy may have missed  
32  
33 studies that described programs with specific population groups, for example, refugees or children.  
34  
35 This is because information in the title and abstract of relevant studies may not have overtly referred  
36  
37 to access to primary care, and improving access may have been a by-product of the reported  
38  
39 intervention (for example, access to health prevention programs).  
40  
41

42  
43 Studies describing programs, but not reporting on our explicit outcomes, were not included. While  
44  
45 this strategy contributed to a more focused search, studies that reported the implementation of  
46  
47 programs but not outcomes are missing.  
48

### 49 **Implications for practice**

50  
51  
52 The impact of navigators or navigation on access to primary care is not clear. The studies included in  
53  
54 the review used navigators in a range of settings, from emergency departments, inpatient wards,  
55  
56  
57  
58  
59

1  
2  
3 outpatient services, and in the community. While we did not report on the studies' effectiveness,  
4 using patient navigation to improve access to primary care may have merit, particularly using a  
5 navigator (person) rather than a process, such as an electronic system. For providers and  
6  
7 organisations wanting to link vulnerable people to primary care in a patient-centred way, navigators  
8  
9 may assist in this process.  
10  
11  
12

### 13 14 **Future research**

15  
16 Despite the interest in using patient navigators to connect people to primary care, many of the  
17 studies included were program descriptions with little evidence to indicate a sustainable impact or  
18 effectiveness. Analysis of cost effectiveness, while not a focus of this review, was nevertheless  
19  
20 absent in the cited studies. As the concept of navigator continues to show promise, models and  
21  
22 frameworks are required to measure impact and give direction to settings interested in using this  
23  
24 intervention.  
25  
26  
27  
28  
29

### 30 **CONCLUSION**

31  
32 Patient navigators may be used across health care settings to improve access to care. Navigators are  
33  
34 inherently patient-centred due to their relational approach and ability to connect people to primary  
35  
36 care. Interventions to improve access to primary care require further study to determine their  
37  
38 impact and cost-effectiveness.  
39  
40  
41  
42  
43  
44  
45  
46  
47  
48  
49  
50  
51  
52  
53  
54  
55  
56  
57  
58  
59  
60

## Acknowledgements

Nil

## Funding

This work was supported by The Professor Leon Piterman AM PhD Scholarship, Southern Academic Primary Care Research Group, Monash University.

## Competing interests

None declared.

## Contributors

AP involved in writing protocol, searches, screening, extraction, drafting of results and writing of manuscripts. VL and TB involved in content expert input (methodology) and editing manuscripts. GR oversaw the project, assisted with screening, content expert input, drafting of results and editing of manuscripts.

## Data sharing statement

Further details on studies included in this scoping review can be retrieved by contacting the corresponding author at [annette.peart@monash.edu](mailto:annette.peart@monash.edu).

## References

1. Schamess A, Foraker R, Kretovics M, et al. Reduced emergency room and hospital utilization in persons with multiple chronic conditions and disability receiving home-based primary care. *Disabil Health J* 2017;10:326-33. doi: 10.1016/j.dhjo.2016.10.004
2. Loignon C, Hudon C, Goulet É, et al. Perceived barriers to healthcare for persons living in poverty in Quebec, Canada: the EQUIhealthY project. *Int J Equity Health* 2015;14:4. doi: 10.1186/s12939-015-0135-5

- 1  
2  
3 3. Ford JA, Wong G, Jones AP, et al. Access to primary care for socioeconomically disadvantaged  
4  
5 older people in rural areas: a realist review. *BMJ Open* 2016;6:e010652. doi:  
6  
7 10.1136/bmjopen-2015-010652  
8
- 9 4. Davy C, Harfield S, McArthur A, et al. Access to primary health care services for Indigenous  
10  
11 peoples: A framework synthesis. *Int J Equity Health* 2016;15:163. doi: 10.1186/s12939-016-  
12  
13 0450-5  
14
- 15 5. Levesque J-F, Harris MF, Russell G. Patient-centred access to health care: conceptualising access at  
16  
17 the interface of health systems and populations. *Int J Equity Health* 2013;12:1-9. doi:  
18  
19 10.1186/1475-9276-12-18  
20
- 21 6. McColl MA, Aiken A, Schaub M. Do people with disabilities have difficulty finding a family  
22  
23 physician? *Int J Environ Res Public Health* 2015;12:4638-51. doi: 10.3390/ijerph120504638  
24  
25
- 26 7. Shi L, Lebrun-Harris LA, Daly CA, et al. Reducing disparities in access to primary care and patient  
27  
28 satisfaction with care: The role of health centers. *J Health Care Poor Underserved*  
29  
30 2013;24:56-66. doi: 10.1353/hpu.2013.0022  
31
- 32 8. Starfield B. Primary care: balancing health needs, services, and technology. New York: Oxford  
33  
34 University Press 1998.  
35
- 36 9. Starfield B. Primary care: an increasingly important contributor to effectiveness, equity, and  
37  
38 efficiency of health services. SESPAS report 2012. *Gac Sanit* 2012;26:20-26. doi:  
39  
40 10.1016/j.gaceta.2011.10.009  
41  
42
- 43 10. Janamian T, Jackson CL, Glasson N, et al. A systematic review of the challenges to  
44  
45 implementation of the patient-centred medical home: lessons for Australia. *Med J Aust*  
46  
47 2014;201:S69-73. doi: 10.5694/mja14.00295  
48
- 49 11. Epstein RM, Fiscella K, Lesser CS, et al. Why the nation needs a policy push on patient-centered  
50  
51 health care. *Health Aff (Millwood)* 2010;29:1489-95. doi: 10.1377/hlthaff.2009.0888  
52
- 53 12. Kelly E, Ivers N, Zawi R, et al. Patient navigators for people with chronic disease: protocol for a  
54  
55 systematic review and meta-analysis. *Syst Rev* 2015;4:28. doi: 10.1186/s13643-015-0019-1  
56  
57  
58  
59

- 1  
2  
3 13. Natale-Pereira A, Enard KR, Nevarez L, et al. The role of patient navigators in eliminating health  
4  
5 disparities. *Cancer* 2011;117:3541-50. doi: 10.1002/cncr.26264  
6  
7 14. Jean-Pierre P, Hendren S, Fiscella K, et al. Understanding the processes of patient navigation to  
8  
9 reduce disparities in cancer care: perspectives of trained navigators from the field. *J Cancer*  
10  
11 *Educ* 2011;26:111-20. doi: 10.1007/s13187-010-0122-x  
12  
13 15. Dennis S, Hasan I, Jackson Pulver L, et al. Experiences and views of a brokerage model for  
14  
15 primary care for Aboriginal people. *Aust Health Rev* 2015;39:26-32. doi: 10.1071/AH13205  
16  
17 16. Freeman HP. The origin, evolution, and principles of patient navigation. *Cancer Epidemiol*  
18  
19 *Biomarkers Prev* 2012;21:1614-17. doi: 10.1158/1055-9965.EPI-12-0982  
20  
21 17. Manderson B, McMurray J, Piraino E, et al. Navigation roles support chronically ill older adults  
22  
23 through healthcare transitions: a systematic review of the literature. *Health Soc Care*  
24  
25 *Community* 2012;20:113-27. doi: 10.1111/j.1365-2524.2011.01032.x  
26  
27 18. Glick SB, Clarke AR, Blanchard A, et al. Cervical cancer screening, diagnosis and treatment  
28  
29 interventions for racial and ethnic minorities: a systematic review. *J Gen Intern Med*  
30  
31 2012;27:1016-32. doi: 10.1007/s11606-012-2052-2  
32  
33 19. Tho PC, Ang E. The effectiveness of patient navigation programs for adult cancer patients  
34  
35 undergoing treatment: a systematic review. *JBI Database System Rev Implement Rep*  
36  
37 2016;14:295-321. doi: 10.11124/jbisrir-2016-2324  
38  
39 20. Tan CHH, Wilson S, McConigley R. Experiences of cancer patients in a patient navigation program:  
40  
41 a qualitative systematic review. *JBI Database System Rev Implement Rep* 2015;13:136-68.  
42  
43 doi: 10.11124/jbisrir-2015-1588  
44  
45 21. Robinson-White S, Conroy B, Slavish KH, et al. Patient navigation in breast cancer: a systematic  
46  
47 review. *Cancer Nurs* 2010;33:127-40. doi: 10.1097/NCC.0b013e3181c40401  
48  
49 22. Naylor K, Ward J, Polite BN. Interventions to improve care related to colorectal cancer among  
50  
51 racial and ethnic minorities: a systematic review. *J Gen Intern Med* 2012;27:1033-46. doi:  
52  
53 10.1007/s11606-012-2044-2  
54  
55  
56  
57  
58  
59  
60

- 1  
2  
3 23. Genoff MC, Zaballa A, Gany F, et al. Navigating language barriers: a systematic review of patient  
4  
5 navigators' impact on cancer screening for limited English proficient patients. *J Gen Intern*  
6  
7 *Med* 2016;31:426-34. doi: 10.1007/s11606-015-3572-3  
8  
9 24. Eschiti V, Burhansstipanov L, Watanabe-Galloway S. Native cancer navigation: the state of the  
10  
11 science. *Clin J Oncol Nurs*, 2012;16:73-82. doi: 10.1188/12.CJON.73-82  
12  
13 25. Ranaghan C, Boyle K, Meehan M, et al. Effectiveness of a patient navigator on patient  
14  
15 satisfaction in adult patients in an ambulatory care setting: a systematic review. *JBIR*  
16  
17 *Database System Rev Implement Rep* 2016;14:172-218. doi: 10.11124/JBISRIR-2016-003049  
18  
19 26. Meredith SM. Disparities in breast cancer and the role of patient navigator programs. *Clin J Oncol*  
20  
21 *Nurs*, 2013;17:54-59. doi: 10.1188/13.CJON.54-59  
22  
23 27. Krok-Schoen JL, Oliveri JM, Paskett ED. Cancer care delivery and women's health: the role of  
24  
25 patient navigation. *Frontiers in Oncology* 2016;6:2. doi: 10.3389/fonc.2016.00002  
26  
27  
28 28. Epstein RM, Street RL. The values and value of patient-centered care. *Ann Fam Med* 2011;9:100-  
29  
30 03. doi: 10.1370/afm.1239  
31  
32 29. Sidani S, Fox M. Patient-centered care: clarification of its specific elements to facilitate  
33  
34 interprofessional care. *J Interprof Care* 2014;28:134-41. doi:  
35  
36 10.3109/13561820.2013.862519  
37  
38 30. Constand MK, MacDermid JC, Dal Bello-Haas V, et al. Scoping review of patient-centered care  
39  
40 approaches in healthcare. *BMC Health Serv Res* 2014;14:1-9. doi: 10.1186/1472-6963-14-271  
41  
42 31. Cadzow RB, Craig M, Rowe J, et al. Transforming community members into diabetes cultural  
43  
44 health brokers: the Neighborhood Health Talker project. *Diabetes Educ* 2013;39:100-08. doi:  
45  
46 10.1177/0145721712465342  
47  
48 32. Torres S, Spitzer DL, Labonté R, et al. Community health workers in Canada: innovative  
49  
50 approaches to health promotion outreach and community development among immigrant  
51  
52 and refugee populations. *J Ambul Care Manage* 2013;36:305-18. doi:  
53  
54 10.1097/JAC.0b013e3182a5480f  
55  
56  
57  
58  
59  
60

- 1  
2  
3 33. Smit E, Leenaars KEF, Wagemakers MAE, et al. Evaluation of the role of Care Sport Connectors in  
4 connecting primary care, sport, and physical activity, and residents' participation in the  
5 Netherlands: study protocol for a longitudinal multiple case study design. *BMC Public Health*  
6  
7 2015;15:1-13. doi: 10.1186/s12889-015-1841-z  
8  
9  
10  
11 34. Arksey H, O'Malley L. Scoping studies: towards a methodological framework. *International*  
12  
13 *Journal of Social Research Methodology* 2005;8:19-32. doi: 10.1080/1364557032000119616  
14  
15 35. Levac D, Colquhoun H, O'Brien KK. Scoping studies: advancing the methodology. *Implement Sci*  
16  
17 2010;5:1-9. doi: 10.1186/1748-5908-5-69  
18  
19 36. Wang ML, Gallivan L, Lemon SC, et al. Navigating to health: evaluation of a community health  
20  
21 center patient navigation program. *Preventive Medicine Reports* 2015;2:664-68. doi:  
22  
23 10.1016/j.pmedr.2015.08.002  
24  
25 37. Institute of Medicine. Crossing the quality chasm: a new health system for the 21st century.  
26  
27 Washington, DC.: National Academies Press 2001.  
28  
29 38. Parker VA, Lemak CH. Navigating patient navigation: crossing health services research and clinical  
30  
31 boundaries. In: Blair JD, Fottler MD, eds. Biennial Review of Health Care Management  
32  
33 (Advances in Health Care Management, Volume 11). Emerald Group Publishing Limited  
34  
35 2011:149-183.  
36  
37 39. Griswold KS, Homish GG, Pastore PA, et al. A randomized trial: are care navigators effective in  
38  
39 connecting patients to primary care after psychiatric crisis? *Community Ment Health J*  
40  
41 2010;46:398-402. doi: 10.1007/s10597-010-9300-x  
42  
43  
44 40. Griswold KS, Servoss TJ, Leonard KE, et al. Connections to primary medical care after psychiatric  
45  
46 crisis. *J Am Board Fam Pract* 2005;18:166-72. doi: 10.3122/jabfm.18.3.166  
47  
48 41. Griswold KS, Zayas LE, Pastore PA, et al. Primary care after psychiatric crisis: a qualitative analysis.  
49  
50 *Ann Fam Med* 2008;6:38-43. doi: 10.1370/afm.760  
51  
52  
53  
54  
55  
56  
57  
58  
59  
60

- 1  
2  
3 42. Bishop S, Edwards, JM, Nadkarni, M. Charlottesville Health Access: a locality-based model of  
4  
5 health care navigation for the homeless. *J Health Care Poor Underserved* 2009;20:958-63.  
6  
7 doi: 10.1353/hpu.0.0219  
8
- 9 43. Chan TC, Killeen JP, Castillo EM, et al. Impact of an internet-based emergency department  
10  
11 appointment system to access primary care at safety net community clinics. *Ann Emerg Med*  
12  
13 2009;54:279-84. doi: 10.1016/j.annemergmed.2008.10.030  
14
- 15 44. Doran KM, Colucci AC, Hessler RA, et al. An intervention connecting low-acuity emergency  
16  
17 department patients with primary care: effect on future primary care linkage. *Ann Emerg*  
18  
19 *Med* 2013;61:312-21.e7. doi: 10.1016/j.annemergmed.2012.10.021  
20
- 21 45. Elliott K, W. Klein J, Basu A, et al. Transitional care clinics for follow-up and primary care linkage  
22  
23 for patients discharged from the ED. *Am J Emerg Med* 2016;34:1230-35. doi:  
24  
25 10.1016/j.ajem.2016.03.029  
26  
27
- 28 46. Gany F, Bari S, Gill P, et al. Step On It! Impact of a workplace New York City taxi driver health  
29  
30 intervention to increase necessary health care access. *Am J Public Health* 2015;105:786-92.  
31  
32 doi: 10.2105/AJPH.2014.302122  
33
- 34 47. Horwitz SM, Busch SH, Balestracci KMB, et al. Intensive intervention improves primary care  
35  
36 follow-up for uninsured emergency department patients. *Acad Emerg Med* 2005;12:647-52.  
37  
38 doi: 10.1197/j.aem.2005.02.015  
39
- 40 48. Kahn LS, Aiello J, Berdine DE, et al. The use of telephonic case management to link a special-  
41  
42 needs population with a primary care physician. *J Am Board Fam Med* 2009;22:585-87. doi:  
43  
44 10.3122/jabfm.2009.05.080230  
45
- 46 49. Kangovi S, Mitra N, Grande D, et al. Patient-centered community health worker intervention to  
47  
48 improve posthospital outcomes: a randomized clinical trial. *JAMA Intern Med* 2014;174:535-  
49  
50 43. doi: 10.1001/jamainternmed.2013.14327  
51  
52  
53  
54  
55  
56  
57  
58  
59  
60



- 1  
2  
3 50. Kim TY, Mortensen K, Eldridge B. Linking uninsured patients treated in the emergency  
4 department to primary care shows some promise in Maryland. *Health Aff (Millwood)*  
5 2015;34:796-804. doi: 10.1377/hlthaff.2014.1102  
6  
7  
8  
9 51. Marr AL, Pillow T, Brown S. Southside Medical Homes Network: linking emergency department  
10 patients to community care. *Prehosp Disaster Med* 2008;23:282-84. doi:  
11 10.1017/S1049023X00065018  
12  
13  
14  
15 52. Overholser LS, Hassell K, Nuss R, et al. Using patient navigators to help adults with sickle cell  
16 disease obtain a primary care home. *Journal of Clinical Outcomes Management*  
17 2014;21:304-07. [http://www.jcomjournal.com/reports-from-the-fieldusing-patient-](http://www.jcomjournal.com/reports-from-the-fieldusing-patient-navigators-to-help-adults-with-sickle-cell-disease-obtain-a-primary-care-home/)  
18 [navigators-to-help-adults-with-sickle-cell-disease-obtain-a-primary-care-home/](http://www.jcomjournal.com/reports-from-the-fieldusing-patient-navigators-to-help-adults-with-sickle-cell-disease-obtain-a-primary-care-home/) (accessed 25  
19 May 2016).  
20  
21  
22  
23  
24  
25  
26 53. Treadwell H, Holden K, Hubbard R, et al. Addressing obesity and diabetes among African  
27 American men: examination of a community-based model of prevention. *J Natl Med Assoc*  
28 2010;102:794-802. doi: 10.1016/S0027-9684(15)30676-3  
29  
30  
31  
32 54. Wexler R, Hefner JL, Sieck C, et al. Connecting emergency department patients to primary care. *J*  
33 *Am Board Fam Med* 2015;28:722-32. doi: 10.3122/jabfm.2015.06.150044  
34  
35  
36 55. ED navigators connect patients to better venues of care. *ED Manage* 2011;May:53-55.  
37 [https://www.ahcmedia.com/articles/130240-ed-navigators-connect-patients-to-better-](https://www.ahcmedia.com/articles/130240-ed-navigators-connect-patients-to-better-venues-of-care)  
38 [venues-of-care](https://www.ahcmedia.com/articles/130240-ed-navigators-connect-patients-to-better-venues-of-care) (accessed 25 May 2016).  
39  
40  
41  
42 56. Navigator reduces readmissions, inappropriate ED visits. *Hosp Case Manage* 2014;22:166-67.  
43 [https://www.ahcmedia.com/articles/16977-navigator-reduces-readmissions-inappropriate-](https://www.ahcmedia.com/articles/16977-navigator-reduces-readmissions-inappropriate-ed-visits)  
44 [ed-visits](https://www.ahcmedia.com/articles/16977-navigator-reduces-readmissions-inappropriate-ed-visits) (accessed 19 May 2016).  
45  
46  
47  
48 57. ED navigators help patients find a PCP. *Hosp Case Manage* 2014;22:9-10.  
49 <https://www.ahcmedia.com/articles/65216-ed-navigators-help-patients-find-a-pcp>  
50 <https://www.ahcmedia.com/articles/65216-ed-navigators-help-patients-find-a-pcp>  
51 (accessed 19 May 2016).  
52  
53  
54  
55  
56  
57  
58  
59  
60

- 1  
2  
3 58. Freeman HP. The history, principles, and future of patient navigation: commentary. *Semin Oncol*  
4  
5 *Nurs* 2013;29:72-75. doi: 10.1016/j.soncn.2013.02.002  
6  
7 59. Freeman HP, Rodriguez RL. History and principles of patient navigation. *Cancer* 2011;117:3537-  
8  
9 40. doi: 10.1002/cncr.26262  
10  
11 60. Gunn CM, Clark JA, Battaglia TA, et al. An assessment of patient navigator activities in breast  
12  
13 cancer patient navigation programs using a nine-principle framework. *Health Serv Res*  
14  
15 2014;49:1555-77. doi: 10.1111/1475-6773.12184  
16  
17 61. Parker VA, Clark JA, Leyson J, et al. Patient navigation: development of a protocol for describing  
18  
19 what navigators do. *Health Serv Res* 2010;45:514-31. doi: 10.1111/j.1475-6773.2009.01079.x  
20  
21  
22  
23  
24  
25  
26  
27  
28  
29  
30  
31  
32  
33  
34  
35  
36  
37  
38  
39  
40  
41  
42  
43  
44  
45  
46  
47  
48  
49  
50  
51  
52  
53  
54  
55  
56  
57  
58  
59  
60

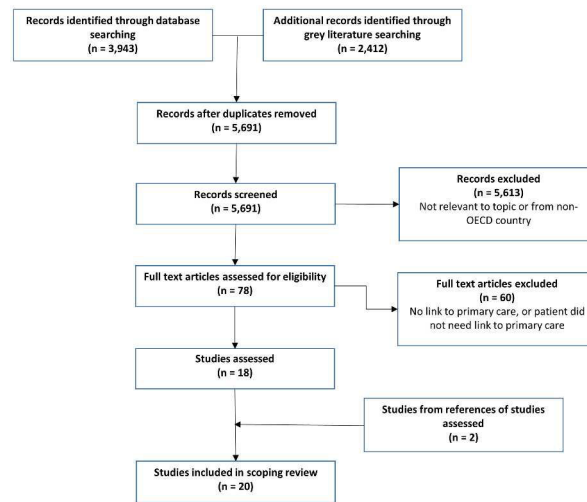

Figure 1. Flow Chart

1058x595mm (96 x 96 DPI)

## Supplementary File 1

### Databases searched

MEDLINE/PubMed

Embase

CINAHL

AMED

PsycINFO

Cochrane Library

Scopus

Web of Science Core Collection

ProQuest Dissertations & Theses

CIRRIE

PLoS

ProQuest Central

### Grey literature sources

Agency for Healthcare Research and Quality National Guideline Clearinghouse

<http://www.guideline.gov>

Australian Commission on Safety and Quality in Health Care <http://www.safetyandquality.gov.au>

Australian Government Department of Health <http://www.health.gov.au>

Australian Institute of Health and Welfare <http://www.aihw.gov.au>

British Library E-theses Online Service <http://ethos.bl.uk/Home.do>

Canadian Institute for Health Information <https://www.cihi.ca/en>

Canadian Institutes of Health Research <http://www.cihr-irsc.gc.ca/e/193.html>

Centers for Disease Control and Prevention Wonder database <http://wonder.cdc.gov/welcome.html>

1  
2  
3 Commonwealth Fund <http://www.commonwealthfund.org/>  
4

5 European Observatory on Health Systems and Policies [http://www.euro.who.int/en/about-](http://www.euro.who.int/en/about-us/partners/observatory)  
6 [us/partners/observatory](http://www.euro.who.int/en/about-us/partners/observatory)  
7  
8

9  
10 Health Improvement and Innovation Resource Center <http://www.hiirc.org.nz>  
11

12  
13 Health Issues Center <http://www.healthissuescenter.org.au>  
14

15  
16 Health Systems Evidence <http://www.healthsystemsevidence.org/>  
17

18  
19 Institute for Clinical Evaluative Sciences <http://www.ices.on.ca/>  
20

21  
22 Institute for Healthcare Improvement <http://www.ihl.org/Pages/default.aspx>  
23

24  
25 Kings Fund <http://www.kingsfund.org.uk/>  
26

27  
28 MacColl Center for Health Care Innovation <http://maccollcenter.org/>  
29

30  
31 National Collaborating Centers for Public Health <http://www.nccph.ca/2/home.ccnsp>  
32

33  
34 National Institute for Health and Care Excellence <https://www.nice.org.uk/>  
35

36  
37 National Institute for Health and Care Excellence Evidence Search <http://www.evidence.nhs.uk>  
38

39  
40 National Library of Australia Trove <http://trove.nla.gov.au>  
41

42  
43 National Quality Forum <http://www.qualityforum.org/Home.aspx>  
44

45  
46 Networked Digital Library of Theses and Dissertations <http://ndltd.org>  
47

48  
49 New Zealand Ministry of Health <http://www.health.govt.nz>  
50

51  
52 New Zealand Social Policy Evaluation and Research Unit <http://www.superu.govt.nz>  
53

54  
55 NHS Sustainable Improvement Team (formerly Improving Quality) <http://www.nhsig.nhs.uk/>  
56  
57  
58  
59

1  
2  
3 Nuffield Trust <http://www.nuffieldtrust.org.uk/>  
4

5 Open Grey <http://opengrey.eu>  
6  
7

8 Primary Health Care Research and Information Service <http://www.phcris.org.au/researchevidence/>  
9

10 Public Health Agency of Canada <http://www.phac-aspc.gc.ca/index-eng.php>  
11

12 Robert Wood Johnson Foundation <http://www.rwjf.org/>  
13  
14

15 The Change Foundation <http://www.changefoundation.com/>  
16  
17

18 The Health Foundation <http://www.health.org.uk>  
19  
20

21 The Henry J. Kaiser Family Foundation <http://kff.org/>  
22  
23

24 The National Academies of Sciences Engineering Medicine, Health and Medicine Division  
25  
26  
27  
28 <http://www.nationalacademies.org/hmd/>  
29

30 The New York Academy of Medicine Grey Literature Report <http://www.greylit.org/>  
31  
32

33 Theses Canada <http://www.bac-lac.gc.ca/eng/services/theses/Pages/theses-canada.aspx>  
34  
35

36 US National Library of Medicine Health Services Research Projects in Progress  
37  
38  
39 [http://wwwcf.nlm.nih.gov/hsr\\_project/home\\_proj.cfm](http://wwwcf.nlm.nih.gov/hsr_project/home_proj.cfm)  
40

41 World Health Organization Primary Health Care  
42  
43  
44 [http://www.who.int/topics/primary\\_health\\_care/en/](http://www.who.int/topics/primary_health_care/en/)  
45  
46  
47  
48  
49  
50  
51  
52  
53  
54  
55  
56  
57  
58  
59  
60

## Supplementary File 2: Boolean search strategy

Database name and provider: OVID Medline

Search conducted by the first author on 27 April 2016

| Search # | Search term (titles and abstracts, years searched 2000 – April 2016) | Hits  |
|----------|----------------------------------------------------------------------|-------|
| 1        | Broker*                                                              | 1010  |
| 2        | Health broker*                                                       | 7     |
| 3        | Health service* broker                                               | 0     |
| 4        | Community health worker*                                             | 2204  |
| 5        | Community navigat*                                                   | 18    |
| 6        | Peer navigat*                                                        | 27    |
| 7        | Patient navigat*                                                     | 463   |
| 8        | Lay health work*                                                     | 184   |
| 9        | Link* to care                                                        | 800   |
| 10       | Navigat*                                                             | 21928 |
| 11       | 1 or 2 or 3 or 4 or 5 or 6 or 7 or 8 or 9 or 10                      | 26012 |
| 12       | Family practi*                                                       | 8493  |
| 13       | General practi*                                                      | 33546 |
| 14       | Primary care                                                         | 79085 |
| 15       | Primary health care                                                  | 15589 |
| 16       | Community health*                                                    | 16307 |

|    |                                                                                   |        |
|----|-----------------------------------------------------------------------------------|--------|
| 17 | 12 or 13 or 14 or 15 or 16                                                        | 139643 |
| 18 | 11 and 17                                                                         | 2742   |
| 19 | Limit 18 to (abstracts and English language and humans and yr="2000 –<br>Current" | 2194   |

For peer review only



# BMJ Open

## Patient navigators facilitating access to primary care: A scoping review

|                                 |                                                                                                                                                                                                                                                                                                                                         |
|---------------------------------|-----------------------------------------------------------------------------------------------------------------------------------------------------------------------------------------------------------------------------------------------------------------------------------------------------------------------------------------|
| Journal:                        | <i>BMJ Open</i>                                                                                                                                                                                                                                                                                                                         |
| Manuscript ID                   | bmjopen-2017-019252.R1                                                                                                                                                                                                                                                                                                                  |
| Article Type:                   | Research                                                                                                                                                                                                                                                                                                                                |
| Date Submitted by the Author:   | 01-Dec-2017                                                                                                                                                                                                                                                                                                                             |
| Complete List of Authors:       | Peart, Annette; Monash University, Department of General Practice; Monash University<br>Lewis, Virginia; La Trobe University, Australian Institute for Primary Care and Aging<br>Brown, Ted; Monash University, School of Primary and Allied Health Care<br>Russell, Grant; Monash University, School of Primary and Allied Health Care |
| <b>Primary Subject Heading</b>: | General practice / Family practice                                                                                                                                                                                                                                                                                                      |
| Secondary Subject Heading:      | Patient-centred medicine                                                                                                                                                                                                                                                                                                                |
| Keywords:                       | Access to Health Care, Patient Navigation, Patient-Centred Care, PRIMARY CARE                                                                                                                                                                                                                                                           |
|                                 |                                                                                                                                                                                                                                                                                                                                         |

SCHOLARONE™  
Manuscripts

Only

## Title page

### Title of the article

Patient navigators facilitating access to primary care: A scoping review

### Corresponding author

Annette Peart

Southern Academic Primary Care Research Unit, Department of General Practice, School of Primary  
and Allied Health Care

Monash University

Building 1, 270 Ferntree Gully Road

Notting Hill, 3168, Australia

E-mail [annette.peart@monash.edu](mailto:annette.peart@monash.edu)

Telephone +61 3 9902 4899

Fax +61 3 9902 4300

### Co-authors

Virginia Lewis, Australian Institute for Primary Care & Ageing, La Trobe University, Bundoora,  
Australia

Ted Brown, Department of Occupational Therapy, Monash University, Frankston, Australia

Grant Russell, Southern Academic Primary Care Research Unit, Monash University, Notting Hill,  
Australia

1  
2  
3 **Key words**  
4

5 Access to health care, Patient navigation, Patient-centred care, Primary care  
6

7 **Word count**  
8

9  
10 3,224  
11  
12  
13  
14  
15  
16  
17  
18  
19  
20  
21  
22  
23  
24  
25  
26  
27  
28  
29  
30  
31  
32  
33  
34  
35  
36  
37  
38  
39  
40  
41  
42  
43  
44  
45  
46  
47  
48  
49  
50  
51  
52  
53  
54  
55  
56  
57  
58  
59  
60

For peer review only

## Abstract

### Objective

Patient navigators are a promising mechanism to link patients with primary care. While navigators have been used in population health promotion and prevention programs, their impact on access to primary care is not clear. The aim of this scoping review was to examine the use of patient navigators to facilitate access to primary care; how they were defined and described, their components, and the extent to which they were patient-centred.

### Setting and Participants

We used the Arksey and O'Malley scoping review method. Searches were conducted in MEDLINE, Embase, ProQuest Medical, other key databases, and grey literature, for studies reported in English from January 2000 – April 2016. We defined a patient navigator as a person or process creating a connection or link between a person needing primary care and a primary care provider. Our target population was people without a regular source of, affiliation or connection with primary care. Studies were included if they reported on participants who were connected to primary care by patient navigation, and attended or made an appointment with a primary care provider. Data analysis involved descriptive numerical summaries and content analysis.

### Results

Twenty studies were included in the final scoping review. Most studies referred to “patient navigator” or “navigation” as the mechanism of connection to primary care. As such, we grouped the components according to Freeman’s nine-principle framework of patient navigation. Seventeen studies included elements of patient-centred care: informed and involved patient, receptive and responsive health professionals, and a coordinated, supportive health care environment.

## Conclusions

Patient navigators may assist to connect people requiring primary care to appropriate providers and extend the concept of patient-centred care across different health care settings. Navigation requires further study to determine impact and cost-effectiveness, and explore the experience of patients and their families.

For peer review only

## Article summary

### Strengths and limitations of this study

- This is the first scoping review to explore how patient navigators are defined, described and used to facilitate access to primary care for people without an affiliation to a primary care provider.
- It is a comprehensive overview of sources covering peer-reviewed and grey literature.
- Sources were included only if the outcome of the navigation was reported; sources describing patient navigation without reporting of outcomes were excluded.
- Including a description of patient-centredness of the sources is a unique addition to this review of patient navigators.

## INTRODUCTION

Primary care is the first level of access to health care, delivered in the community most often by family physicians or general medical practitioners. However, not all people access primary care that best meets their health care needs, where and when they need it. Some people, such as those living in poverty, with a long-term disability, from a culturally and linguistically diverse background, or located in rural and remote areas, have difficulty accessing primary care services and resources<sup>1-4</sup>.

Access to health care is the opportunity to reach and obtain appropriate health care in situations of perceived need<sup>5</sup>. Access to primary care is important to reduce health care disparities, mortality, morbidity, hospitalisation rates, and health care costs<sup>6-9</sup>. Recent reforms to primary care have focused on trialling new processes and models of care to improve access<sup>10</sup>. These include integrated care models, after-hours telephone consultations, walk-in centres and nurse-led initiatives. However, disparities in care remain for many, such as people having low literacy and numeracy, cognitive deficits, being a member of a marginalized group or not understanding the need for primary care<sup>11</sup>.

A new approach to improve access to primary care is *patient navigation*, a process where a person (navigator) engages with a patient to determine barriers to care and provides information to improve access to components of the health system, not just primary care<sup>12</sup>. A patient navigator has been described as a type of 'broker', who uses a biopsychosocial approach to provide a range of instrumental and relational functions and processes<sup>13 14</sup> to not only support patients to access primary care but directly identify providers willing to treat vulnerable people requiring care<sup>15</sup>.

Patient navigator tasks can include educating patients about early symptoms of cancer (in preventive care) or facilitating and coordinating appointments with providers to improve access to a regular primary care provider. Originating in the 1990s, patient navigation developed as a strategy to reduce barriers to breast cancer care<sup>16</sup>. Since then, patient navigators have been used for the screening of various cancers and through the cancer care continuum, with mixed success<sup>17-27</sup>. In primary care, navigators may have a role in improving access and coordination of care, especially for

1  
2  
3 vulnerable populations whose access to care may be compromised by a range of geographic,  
4 demographic, socioeconomic or cultural characteristics<sup>28</sup>.

5  
6  
7  
8 Patient-centred care is a core element of high-quality primary care, facilitates access to appropriate  
9 care<sup>11</sup>, and has been identified as one of six areas of focus for improving health care systems<sup>29</sup>. In  
10 primary care, patient-centred care consists of interactions and relationships between providers and  
11 patients to share information, explore values and preferences, facilitate access to appropriate care,  
12 and address health care disparities<sup>30 31</sup>. While numerous frameworks of patient-centred care have  
13 been described<sup>32</sup>, Epstein's<sup>11</sup> succinct model of patient-centred care comprising: an informed and  
14 involved patient, receptive and responsive health professionals, and a coordinated, supportive  
15 health care environment, sits well within the context of patient navigation and its extension beyond  
16 the patient-clinician relationship to the setting in which care is delivered.

17  
18  
19  
20  
21  
22  
23  
24  
25  
26  
27 While navigators have been used in population health promotion and prevention programs<sup>33 34</sup>,  
28 there has been recent interest in their use in facilitating access to primary care for vulnerable people  
29 without a regular primary care provider<sup>28</sup>. Understanding the components of these programs can  
30 assist those interested in designing or implementing similar programs. Therefore, we performed a  
31 scoping review of the use of patient navigation to facilitate access to primary care. Given its  
32 importance and relevance to navigation, we included an additional focus on the extent to which  
33 identified patient navigation interventions were patient-centred.

## 34 35 36 37 38 39 40 41 42 43 **METHODS**

44  
45 We chose the scoping review method to map the extent, range and nature of published research on  
46 the use of patient navigation to further understand how it links people to primary care<sup>35</sup>. When  
47 compared to systematic reviews, scoping reviews address broader topics and are less reliant on  
48 detailed research questions or quality assessments<sup>35</sup>. The work was structured around the five  
49 stages of the Arksey and O'Malley framework: (1) identify the research question, (2) identify  
50 relevant studies, (3) study selection, (4) chart the data, and (5) collate, summarize and report the  
51  
52  
53  
54  
55  
56  
57  
58  
59  
60



1  
2  
3 results. The review was also informed by Levac et al's.<sup>36</sup> refinements to Arksey and O'Malley's  
4  
5 framework.

### 6 7 8 **Stage 1: Identify the research question**

9  
10 Patient navigation has been defined as a "process, by which an individual, a patient navigator, guides  
11  
12 patients in overcoming barriers to health care services access to facilitate timely access to care"<sup>37</sup>.

13  
14 We expanded this definition to include a patient navigator as a person or process creating a  
15  
16 connection or link between a person needing primary care and a primary care provider.

17  
18 Our target population was people without a regular source of or affiliation or connection with  
19  
20 primary care. The outcome of interest was the person needing care attended an appointment or  
21  
22 made contact with the referred primary care provider. These definitions helped us to clarify the  
23  
24 focus of the review, confirm the inclusion criteria adopted and establish parameters for the search  
25  
26 strategy<sup>36</sup>. This review did not focus on the impact or effectiveness of patient navigation programs in  
27  
28 this context. We asked three questions to guide the scoping review:  
29  
30

- 31  
32 1. How have patient navigators been defined and described in connecting people who are  
33  
34 unattached to primary care to a primary care provider for regular care?
- 35  
36 2. What are the components of these patient navigation programs?
- 37  
38 3. To what extent has patient-centredness been incorporated into the design, implementation  
39  
40 and analysis of patient navigation programs?  
41  
42  
43

### 44 **Stage 2: Identify relevant studies**

45  
46 We identified relevant studies through a search of electronic databases, grey literature, and  
47  
48 reference lists of key articles sourced (Supplementary File 1).  
49  
50

51  
52 A three-step search strategy was used. Firstly, we undertook an initial limited search of MEDLINE,  
53  
54 Embase and CINAHL using terms and variants of "navigator", "broker", "link worker" and  
55  
56 "community health worker". We analysed the text in the titles and abstracts of retrieved studies and  
57  
58

1  
2  
3 index terms used to refine key terms. The terms most common were related to *navigation, linkage,*  
4  
5 and *access to care*. We completed a second search of the same databases and extended the search  
6  
7 to include related medical and social science databases and grey literature using the key terms and  
8  
9 variants (Table 1) identified by the initial search strategy (Supplementary File 2).  
10  
11  
12  
13  
14  
15  
16  
17  
18  
19  
20  
21  
22  
23  
24  
25  
26  
27  
28  
29  
30  
31  
32  
33  
34  
35  
36  
37  
38  
39  
40  
41  
42  
43  
44  
45  
46  
47  
48  
49  
50  
51  
52  
53  
54  
55  
56  
57  
58  
59  
60

Table 1: Key search terms

| Concept, program or intervention | Setting                       |
|----------------------------------|-------------------------------|
| Navigator/navigation             | Community health              |
| Patient navigator/navigation     | Family practice/practitioner  |
| Peer navigator/navigation        | General practice/practitioner |
| Broker                           | Primary care                  |
| Health broker                    | Primary health care           |
| Health services broker           |                               |
| Community health worker          |                               |
| Community navigator/navigation   |                               |
| Lay health worker                |                               |
| Linkage to care                  |                               |

Finally, we checked the reference lists of all identified studies (and their citations) for additional studies.

### Stage 3: Study selection

Inclusion criteria were applied as a basis for which studies were considered relevant to the review questions. Studies were included if they:

- Were published in English from January 2000-May 2016. The start date of 2000 reflects the increasing interest in patient-centred care in the last two decades. Reforms of primary care commenced around this time<sup>29</sup> along with the emergence of navigator-type approaches<sup>38</sup>;
- Reported on patients who did not have a regular source of primary care (provider or practice);
- Connected patients to primary care by a process (for example, navigation) or a person (for example, navigator); and,

- Reported an outcome of patients attending or making at least one appointment with primary care providers.

We excluded studies if they originated in countries who were not members of the Organisation for Economic Cooperation and Development (OECD), as their primary care systems differ significantly from those of OECD countries. Other exclusion criteria were applied to studies where:

- Patients lived in residential care, or incarcerated with no imminent release date, as their primary care needs were assumed to be met by institutional providers;
- A navigator was attached to a primary care provider or practice as this indicated the patient was already connected to primary care; and,
- A navigator referred patients to health screening or assessment services only, and not to a primary care provider.

Author 1 reviewed titles and abstracts of studies, and Author 2 independently reviewed abstracts where there was uncertainty for inclusion.

#### **Stage 4: Chart the data**

Data extracted was entered into a template developed in Microsoft Excel specifically for this review. Information on authors, year of publication, study location and context, aims or purpose of the research, study type or design, population and sample size, methodology, conceptual model, intervention type and duration, measures used, and key findings were recorded on this form. We also extracted data relevant to the research questions: definitions and descriptions of navigators, components of navigator programs, and elements of patient-centred care. Charting the data was an iterative process<sup>36</sup> that we updated as studies revealed useful data categories. Studies were reviewed a number of times to ensure all relevant data was captured.

### Stage 5: Collate, summarize and report the results

We collated the data using a Microsoft Excel spreadsheet. Excerpts of text were coded deductively by Author 1 to identify concepts and themes related to the research questions. Author 4 checked the coding scheme and the themes raised.

## RESULTS

Our initial search terms generated 6,355 records from electronic databases and grey literature (Figure 1). We removed 664 duplicates, leaving 5,691 records to be screened. Of these, 5,613 records were excluded based on the title and/or abstract review, as they were not relevant to the question, did not meet inclusion criteria, or originated in non-OECD countries. Of the remaining 78 records, full-text review excluded 44 where participants were not linked to primary care and 16 where participants already had a primary care provider or did not indicate a need for primary care. We searched references and citations of the remaining 18 records, adding two additional studies. This resulted in 20 selected for inclusion in the scoping review. The selection process is shown in the flow chart (Figure 1).

Of the 20 included studies, three reported on the same randomized controlled trial at different phases<sup>39-41</sup>. These three studies were counted as unique studies as each reported on different elements of the same trial: preliminary findings, qualitative analysis of interviews, and longitudinal findings.

Eleven studies were descriptions or evaluations of programs, eight were intervention studies, and one was a retrospective study. Thirteen were programs based in emergency departments, six were community-based programs, and one was delivered in an inpatient setting. All studies were conducted in the United States. Table 2 outlines characteristics of the included studies.

1  
2  
3  
4  
5  
6  
7  
8  
9  
10  
11  
12  
13  
14  
15  
16  
17  
18  
19  
20  
21  
22  
23  
24  
25  
26  
27  
28  
29  
30  
31  
32  
33  
34  
35  
36  
37  
38  
39  
40  
41  
42  
43  
44  
45  
46  
47

Table 2 Characteristics of included studies

| Author               | Context                                                                      | Study type                                                                                               | Population and sampling                                                                                             | Primary outcome             | Description                                                                                                                                                                                                                                                                               |
|----------------------|------------------------------------------------------------------------------|----------------------------------------------------------------------------------------------------------|---------------------------------------------------------------------------------------------------------------------|-----------------------------|-------------------------------------------------------------------------------------------------------------------------------------------------------------------------------------------------------------------------------------------------------------------------------------------|
| Bishop <sup>42</sup> | Private, non-profit, community homeless shelter                              | Description of Charlottesville Health Access initiative to enhance access to care                        | Homeless and near-homeless people, without a health care provider, attending health fair at shelter or soup kitchen | Not stated                  | <i>Volunteer navigator</i> (student or community member) completed a training course, engaged person by building relationships, assessed needs, guided to providers, translated confusing information, coordinated follow-up, empowered people to understand health system and self-care. |
| Chan <sup>43</sup>   | Emergency department in low-income, urban area served by 3 community clinics | Non-randomized, non-blinded interventional trial to improve primary care access for underserved patients | Patients with no primary care provider assessed by emergency physician to benefit from clinic                       | Clinic visit within 14 days | <i>Internet-based secure referral system</i> between emergency department medical record and clinic appointment systems. System accessed clinic availability and                                                                                                                          |

For peer review only

|                       |                                                                                                           |                                                                                           |                                                                                                                                                                                 |                                             |                                                                                                                                                                                                                                  |
|-----------------------|-----------------------------------------------------------------------------------------------------------|-------------------------------------------------------------------------------------------|---------------------------------------------------------------------------------------------------------------------------------------------------------------------------------|---------------------------------------------|----------------------------------------------------------------------------------------------------------------------------------------------------------------------------------------------------------------------------------|
|                       |                                                                                                           |                                                                                           | follow-up (n=326)                                                                                                                                                               |                                             | allowed emergency physicians to give patients follow-up appointments at clinics.                                                                                                                                                 |
| Doran <sup>44</sup>   | Urban, public, safety-net hospital emergency department with primary care clinic in same building complex | Quasi-experimental trial to navigate willing patients from emergency department to clinic | Adults with no primary care provider, presenting with low-acuity problems, assigned to intervention or usual care based on where care expected to result in least delay (n=965) | Clinic visit within 1 year                  | <i>Trained patient navigator</i> escorted patients from emergency waiting room to clinic. Patients assigned physician who addressed current problems, established care plan and gave card with name and clinic telephone number. |
| Elliott <sup>45</sup> | Urban emergency department, serving high proportion of vulnerable                                         | Retrospective study using full electronic medical record                                  | Patients with no primary care provider, discharged and                                                                                                                          | Transitional care clinic visit as scheduled | <i>Transitional care clinic</i> staff worked with patients to determine preferences and locate convenient,                                                                                                                       |

1  
2  
3  
4  
5  
6  
7  
8  
9  
10  
11  
12  
13  
14  
15  
16  
17  
18  
19  
20  
21  
22  
23  
24  
25  
26  
27  
28  
29  
30  
31  
32  
33  
34  
35  
36  
37  
38  
39  
40  
41  
42  
43  
44  
45  
46  
47

|                           |                                                                                                                                                                                     |                                                                                                                          |                                                                                                                              |                                           |                                                                                                                                                                                                                                                                                      |
|---------------------------|-------------------------------------------------------------------------------------------------------------------------------------------------------------------------------------|--------------------------------------------------------------------------------------------------------------------------|------------------------------------------------------------------------------------------------------------------------------|-------------------------------------------|--------------------------------------------------------------------------------------------------------------------------------------------------------------------------------------------------------------------------------------------------------------------------------------|
|                           | patients                                                                                                                                                                            | abstraction, randomly sampled                                                                                            | referred to transitional care clinic (n=660)                                                                                 |                                           | appropriate provider and made new appointment with chosen provider.                                                                                                                                                                                                                  |
| Gany <sup>46</sup>        | Unused parking lot adjacent to JFK International Airport's taxi holding lot                                                                                                         | Description of Step On It! workplace intervention to increase health care access                                         | Convenience sample of taxi drivers waiting in airport holding lot (n=466)                                                    | Provider visit within 6 months            | Health care access and <i>case management</i> to link drivers to providers, including referrals to low-cost (or free) culturally-appropriate clinics or hospitals.                                                                                                                   |
| Griswold <sup>39-41</sup> | Urban Comprehensive Psychiatric Emergency Program (psychiatric assessment and management, targeted therapeutic approaches, links to community mental health services) as usual care | Randomized controlled trial comparing linkage with primary care with standard practice after psychiatric emergency visit | Adults presenting with psychiatric disorder (n=101-175), with no primary care provider or, have not seen one within 6 months | Primary care visit within 3 and 12 months | <i>Care navigator</i> trained in interviewing and case management provided information about low-cost care; facilitated access, reinforced patient education, information to providers about patient's history, follow-up, peer connections to access community and social services. |



|    |                       |                         |                         |                       |                 |                                          |
|----|-----------------------|-------------------------|-------------------------|-----------------------|-----------------|------------------------------------------|
| 1  |                       |                         |                         |                       |                 |                                          |
| 2  |                       |                         |                         |                       |                 |                                          |
| 3  |                       |                         |                         |                       |                 |                                          |
| 4  |                       |                         |                         |                       |                 |                                          |
| 5  | Horwitz <sup>47</sup> | Level 1 urban trauma    | Randomized study of     | Uninsured adults      | Primary care    | <i>Health Promotion Advocates</i> in     |
| 6  |                       | centre                  | intensive case          | presenting to         | clinic visit    | emergency department assisted            |
| 7  |                       |                         | management              | emergency             | within 2        | patients to choose provider, gave        |
| 8  |                       |                         | intervention to improve | department (n=230),   | months          | brochure, faxed information to case      |
| 9  |                       |                         | primary care use        | excluding substance   |                 | worker at selected clinic. Clinic case   |
| 10 |                       |                         |                         | abuse or mental       |                 | worker contacted patient to make         |
| 11 |                       |                         |                         | health issues only    |                 | appointment.                             |
| 12 |                       |                         |                         |                       |                 |                                          |
| 13 |                       |                         |                         |                       |                 |                                          |
| 14 |                       |                         |                         |                       |                 |                                          |
| 15 |                       |                         |                         |                       |                 |                                          |
| 16 |                       |                         |                         |                       |                 |                                          |
| 17 |                       |                         |                         |                       |                 |                                          |
| 18 |                       |                         |                         |                       |                 |                                          |
| 19 |                       |                         |                         |                       |                 |                                          |
| 20 | Kahn <sup>48</sup>    | Medicaid managed care   | Evaluation to assess    | New members with      | Primary care    | <i>Telephone case managers</i> made at   |
| 21 |                       | organisation for people | effectiveness of case   | behavioural health    | visit within 12 | least 3 contact attempts to ensure       |
| 22 |                       | with mental health      | management in linking   | diagnosis and no      | months          | linkage to provider.                     |
| 23 |                       | and/or substance abuse  | new members with        | primary care provider |                 |                                          |
| 24 |                       | diagnoses               | primary care providers  | completing mailed     |                 |                                          |
| 25 |                       |                         |                         | survey (n=368),       |                 |                                          |
| 26 |                       |                         |                         | referred to case      |                 |                                          |
| 27 |                       |                         |                         | management            |                 |                                          |
| 28 |                       |                         |                         |                       |                 |                                          |
| 29 |                       |                         |                         |                       |                 |                                          |
| 30 |                       |                         |                         |                       |                 |                                          |
| 31 |                       |                         |                         |                       |                 |                                          |
| 32 |                       |                         |                         |                       |                 |                                          |
| 33 |                       |                         |                         |                       |                 |                                          |
| 34 |                       |                         |                         |                       |                 |                                          |
| 35 |                       |                         |                         |                       |                 |                                          |
| 36 |                       |                         |                         |                       |                 |                                          |
| 37 | Kangovi <sup>49</sup> | 2 urban, academically-  | 2-armed, single-blind,  | Newly-admitted low-   | Primary care    | <i>Community health workers</i> (trained |
| 38 |                       |                         |                         |                       |                 |                                          |
| 39 |                       |                         |                         |                       |                 |                                          |
| 40 |                       |                         |                         |                       |                 |                                          |
| 41 |                       |                         |                         |                       |                 |                                          |
| 42 |                       |                         |                         |                       |                 |                                          |
| 43 |                       |                         |                         |                       |                 |                                          |
| 44 |                       |                         |                         |                       |                 |                                          |
| 45 |                       |                         |                         |                       |                 |                                          |
| 46 |                       |                         |                         |                       |                 |                                          |
| 47 |                       |                         |                         |                       |                 |                                          |

1  
2  
3  
4  
5  
6  
7  
8  
9  
10  
11  
12  
13  
14  
15  
16  
17  
18  
19  
20  
21  
22  
23  
24  
25  
26  
27  
28  
29  
30  
31  
32  
33  
34  
35  
36  
37  
38  
39  
40  
41  
42  
43  
44  
45  
46  
47

|                    |                                                                                               |                                                                                                                   |                                                                                                                                                    |                                                        |                                                                                                                                                                                                                                    |
|--------------------|-----------------------------------------------------------------------------------------------|-------------------------------------------------------------------------------------------------------------------|----------------------------------------------------------------------------------------------------------------------------------------------------|--------------------------------------------------------|------------------------------------------------------------------------------------------------------------------------------------------------------------------------------------------------------------------------------------|
|                    | affiliated hospitals                                                                          | randomized clinical trial to improve primary care follow-up post-discharge                                        | income, uninsured, or Medicaid adult inpatients randomly numbered, approached until 3 per day enrolled (n=446)                                     | visit within 14 days                                   | lay people of similar backgrounds to patients, selected for personality traits patients identified as important) set goals, supported goal achievement, connected to provider.                                                     |
| Kim <sup>50</sup>  | 5 hospital emergency departments in an affluent area with large and poor immigrant population | Analysis of Emergency Department-Primary Care Connect initiative to link patients to 4 local primary care clinics | Merged data set (hospital discharge, clinic, navigator referral data) of low-income or uninsured patients with no primary care provider (n=10,761) | 2 or more visits to same clinic across 33 month period | <i>Patient navigators</i> of various backgrounds (most unlicensed, selected for communication skills) based in clinics (3 sites) or hospitals (2 sites) spoke face-to-face or telephoned patients referred by emergency providers. |
| Marr <sup>51</sup> | Urban emergency department with high                                                          | Evaluation of program to connect patients with                                                                    | Patients with no primary care provider                                                                                                             | 3 or more visits to same clinic                        | <i>Patient navigator</i> (advocate) recruited from community, trained in                                                                                                                                                           |

For peer review only

|                          |                                                                                  |                                                                                                  |                                                                                                                                           |                                                        |                                                                                                                                                                                                                                              |
|--------------------------|----------------------------------------------------------------------------------|--------------------------------------------------------------------------------------------------|-------------------------------------------------------------------------------------------------------------------------------------------|--------------------------------------------------------|----------------------------------------------------------------------------------------------------------------------------------------------------------------------------------------------------------------------------------------------|
|                          | rates of potentially avoidable hospitalizations and lack of community-based care | community-based, primary care providers                                                          | approached by navigator (n=7,185)                                                                                                         | across 18 month period                                 | emergency department, visited patients waiting for medical care or before discharge, offered referral within 18-clinic system.                                                                                                               |
| Overholser <sup>52</sup> | Specialist outpatient clinics of urban tertiary teaching hospital                | Description of patient navigation program to overcome barriers to finding primary care           | Adults with sickle cell disease with no primary care provider or not seen regularly by provider, referred by specialist physicians (n=21) | Primary care provider visit                            | <i>Patient navigators</i> of various backgrounds trained in navigation proactively sought local providers and established network through outreach, made appointments with patients, sent reminders, educated on importance of primary care. |
| Treadwell <sup>53</sup>  | African-American community centre.                                               | Evaluation of Save Our Sons group health education and intervention model to reduce incidence of | African American men at risk for or diagnosed with diabetes and/or in poor health related to                                              | Physician attainment (connection to primary care home) | 6-week community-based, culturally-responsive, gender-specific health prevention program delivered by <i>community health workers</i> , trusted community members provided links                                                             |

1  
2  
3  
4  
5  
6  
7  
8  
9  
10  
11  
12  
13  
14  
15  
16  
17  
18  
19  
20  
21  
22  
23  
24  
25  
26  
27  
28  
29  
30  
31  
32  
33  
34  
35  
36  
37  
38  
39  
40  
41  
42  
43  
44  
45  
46  
47

|                      |                                                                                                                                     |                                                                                             |                                                                                                      |                                                                                              |                                                                                                                                                                                                                                                                                                                                        |
|----------------------|-------------------------------------------------------------------------------------------------------------------------------------|---------------------------------------------------------------------------------------------|------------------------------------------------------------------------------------------------------|----------------------------------------------------------------------------------------------|----------------------------------------------------------------------------------------------------------------------------------------------------------------------------------------------------------------------------------------------------------------------------------------------------------------------------------------|
|                      |                                                                                                                                     | diabetes and obesity,<br>improve regular access<br>to care, and build<br>community networks | obesity and/or other<br>health concerns;<br>recruited at<br>community event<br>(n=42)                |                                                                                              | between health system and<br>community.                                                                                                                                                                                                                                                                                                |
| Wang <sup>37</sup>   | Community health centre<br>providing comprehensive<br>services to ethnically<br>diverse population with<br>low incomes or uninsured | Evaluation of patient<br>navigation program to<br>optimize health care<br>utilization       | Patients with diabetes<br>and/or hypertension<br>not seen by provider<br>in last 6 months<br>(n=215) | Visit with<br>primary care<br>provider and/or<br>chronic disease<br>nurse within 6<br>months | <i>Patient navigator</i> trained in chronic<br>illness education, motivational<br>interviewing, appointment<br>scheduling. Telephoned patients, built<br>rapport, educated patients, made<br>appointment with provider, assessed<br>need for specialist referrals, identified<br>barriers to access, assisted to<br>overcome barriers. |
| Wexler <sup>54</sup> | Emergency department<br>within urban academic                                                                                       | Randomized controlled<br>trial comparing health                                             | Medicaid enrollees<br>who did not have                                                               | Visit to primary<br>care provider                                                            | <i>Emergency department electronic<br/>medical record</i> to make appointment                                                                                                                                                                                                                                                          |

|                                                                       |                                                      |                                                                                                                                         |                                                                                                                            |                                      |                                                                                                                                                                                                    |
|-----------------------------------------------------------------------|------------------------------------------------------|-----------------------------------------------------------------------------------------------------------------------------------------|----------------------------------------------------------------------------------------------------------------------------|--------------------------------------|----------------------------------------------------------------------------------------------------------------------------------------------------------------------------------------------------|
|                                                                       | medical centre and affiliated primary care practices | information technology intervention to improve access to primary care, with usual care                                                  | usual source of care, emergency physician confirmed visit non-urgent, completed baseline survey, randomly assigned (n=148) | office at 3, 6 and 12 months         | at clinic based on patient location and preference. Patient given appointment reminder card and directions to clinic. Electronic message to clinic with information about patient and appointment. |
| ED navigators connect patients to better venues of care <sup>55</sup> | Emergency departments of 8-hospital system           | News article on use of emergency department navigators to re-direct patients with non-emergency issues to most appropriate care setting | Health plan members with non-urgent problems                                                                               | Return visit to emergency department | <i>Navigator</i> with customer service background assigned members to provider and made appointments.                                                                                              |
| Navigator reduces                                                     | Urban emergency department                           | News article on community health                                                                                                        | Patients with non-urgent problems who                                                                                      | Not stated                           | <i>Community health outreach coordinator/navigator</i> of varying                                                                                                                                  |

1  
2  
3  
4  
5  
6  
7  
8  
9  
10  
11  
12  
13  
14  
15  
16  
17  
18  
19  
20  
21  
22  
23  
24  
25  
26  
27  
28  
29  
30  
31  
32  
33  
34  
35  
36  
37  
38  
39  
40  
41  
42  
43  
44  
45  
46  
47

---

|                         |  |                         |                        |  |                                        |
|-------------------------|--|-------------------------|------------------------|--|----------------------------------------|
| readmissions,           |  | outreach worker         | are uninsured and      |  | cultures representing patients served. |
| inappropriate           |  | helping patients find a | don't have a primary   |  | Met patient in emergency               |
| ED visits <sup>56</sup> |  | primary care provider   | care provider, insured |  | department, coordinated                |
|                         |  |                         | but don't have a       |  | appointments, and set patients up in   |
|                         |  |                         | provider, or have a    |  | medical homes.                         |
|                         |  |                         | provider but can't     |  |                                        |
|                         |  |                         | access him or her      |  |                                        |

---

|                          |                 |                         |                       |                |                                          |
|--------------------------|-----------------|-------------------------|-----------------------|----------------|------------------------------------------|
| ED navigators            | Urban emergency | News article on a pilot | Patients without      | 30-day         | <i>Navigator</i> worked with patients to |
| help patients            | department      | project to reduce 30-   | insurance and primary | readmission    | discuss discharge and help facilitate    |
| find a PCP <sup>57</sup> |                 | day readmissions and    | care provider         | and/or         | follow-up appointments.                  |
|                          |                 | number of self-pay      | admitted to hospital  | emergency      |                                          |
|                          |                 | patients who visit      | through emergency     | department re- |                                          |
|                          |                 | emergency department    | department and or     | visit within 1 |                                          |
|                          |                 | for non-emergent care   | not admitted          | month          |                                          |

---

## Patient navigators: Definition and descriptions

One study defined patient navigation as a “process, by which an individual, a Patient Navigator, guides patients in overcoming barriers to health care services access to facilitate timely access to care”<sup>37</sup>. The studies provided either a description of a navigator (person) or, for three of the studies, navigation process<sup>43 45 54</sup>. Descriptions varied in detail and often consisted of the type of person recruited as a navigator, the tasks they performed, and the training provided (Table 2).

## Patient navigation program components

All of the studies outlined components of their programs; four provided detailed descriptions<sup>39-41 49</sup>. We grouped components according to Freeman’s consensus-based nine-principle framework of patient navigation, originally developed in response to the expansion of patient navigation as a community-based intervention<sup>16 58 59</sup>. Freeman started the first patient navigation program in 1990 to reduce barriers to cancer care in Harlem, New York. These principles have been widely used in patient navigation programs. Each of these principles is outlined below with examples from the studies selected that included sufficient information to inform each principle in the framework.

### *Principle 1: Patient-centred health care service delivery model*

Seventeen of the studies outlined aspects of patient-centred care. This will be discussed further in the section addressing research question three.

### *Principle 2: Integration of a fragmented healthcare system*

This principle relates to a patient experiencing a seamless, timely flow through the continuum of care<sup>16</sup>. We also included another principle (*Principle 8: Connect disconnected health care systems*) here, as the two are similar concepts and this has been done previously<sup>60</sup>. We focused on connections to primary care, not on a continuum of care through stages of illness or disease. Two examples of integration in our scoping review were assisting patients to understand the entire health system<sup>42</sup>, and linking the emergency department with a primary care provider, as well as to community dental, mental health, substance abuse and other social services<sup>51</sup>.

1  
2  
3 *Principle 3: Elimination of barriers*

4 This principle is most effectively carried out through relationships with patients<sup>16</sup>. While removing  
5 barriers to accessing primary care appears implicit in a navigator program, not all studies provided  
6 detail of what the barriers were and how they were addressed. One exception of note is the *Step on*  
7 *It!* intervention at JFK International Airport, which focused on the barriers taxi drivers faced. This  
8 intervention went to the airport holding lot, assisted drivers to locate providers with flexible hours,  
9 culturally and linguistically appropriate models of care, and at low-cost<sup>46</sup>. Another study described a  
10 program that helped adults with sickle cell disease find primary care<sup>52</sup>. The barriers addressed  
11 included patients not understanding why they needed a primary care provider when they already  
12 had a specialist, low literacy, difficulty filling out forms and forgetting appointments. These  
13 navigators used motivational interviewing to identify further barriers and help patients set priorities  
14 beyond accessing primary care<sup>52</sup>.

15  
16  
17  
18  
19  
20  
21  
22  
23  
24  
25  
26  
27  
28  
29 *Principle 4: Clear scope of practice*

30 Three studies provided detail about the role and responsibilities of the navigator<sup>37 49 52</sup>. The most  
31 detailed of these was a randomized clinical trial by Kangovi et al.<sup>49</sup>, providing a website link  
32 (<http://chw.upenn.edu>) containing protocols for recruitment, training and standardized work  
33 practices for navigators, organisational directors and managers.

34  
35  
36  
37  
38  
39  
40 Kangovi et al.<sup>49</sup> created a community health worker model and tested its effect on post-hospital  
41 outcomes among general medical inpatients. This was based on qualitative participatory action  
42 research and had detailed protocols including standardized work practices in three stages: goal  
43 setting, goal support, and connection with primary care. A substantial component was to build  
44 relationships with patients to help set goals for recovery, develop an individualized action plan, and  
45 liaise between the patient and inpatient care team. The worker provided tailored support based on  
46 the patient goals. Patients were connected to primary care and coached to make and attend  
47  
48  
49  
50  
51  
52  
53  
54  
55  
56  
57  
58  
59  
60



1  
2  
3 appointments independently. Provider resources included a discharge summary and the patient's  
4  
5 action plan taken to the appointment.  
6

7  
8 *Principle 5: Cost-effective*  
9

10 None of the studies evaluated the cost-effectiveness of their program.  
11

12  
13 *Principle 6: Defined level of skill*  
14

15 Nine studies provided information on the skill level required of the navigators<sup>39 42 49-53 55</sup>. This ranged  
16  
17 from volunteers with in-house training, staff with customer service backgrounds, to college-  
18  
19 accredited navigators. They were trained on topics such as navigation processes, disease-specific  
20  
21 content such as diabetes education, or motivational interviewing. Similarly, seven studies presented  
22  
23 strategies intentionally used to inform the development of resources to support the navigation  
24  
25 intervention, including a needs assessment<sup>42 56</sup>, software development<sup>43</sup>, community-based  
26  
27 participatory action research<sup>46 49 53</sup> and provider collaboration to develop and test navigation  
28  
29 mechanisms<sup>51</sup>.  
30

31  
32  
33 *Principle 7: Defined beginning and end*  
34

35 Eleven studies outlined definite points at which navigation began and ended<sup>37 43-47 49 51 54 56 57</sup>. Entry  
36  
37 usually involved meeting a patient (in the emergency department or on a hospital ward, for example)  
38  
39 to schedule an appointment. End points of the interventions included "patient has an appointment  
40  
41 made" or "patient sees provider".  
42

43  
44 *Principle 8: Connect disconnected healthcare systems*  
45

46 This principle was combined with a similar principle, (*Principle 2 Integration of a fragmented*  
47  
48 *healthcare system*) for the purposes of this review.  
49  
50  
51  
52  
53  
54  
55  
56  
57  
58  
59  
60

1  
2  
3 *Principle 9: Coordinated system*  
4

5 This principle relates to having an assigned coordinator to oversee all aspects of the intervention<sup>16</sup>.

6  
7 This was evident in two studies: where navigators served as executive officers on a governing  
8 board<sup>42</sup> and were supervised by a social worker as well as having weekly team meetings<sup>49</sup>.  
9  
10

11  
12 **Patient navigation: patient-centredness**  
13

14 Our third question for this review was, 'To what extent has patient-centredness been incorporated  
15 into the design, implementation and analysis of patient navigation programs?' We focused on the  
16 three factors upon which patient-centred care depends: informed and involved patient, receptive  
17 and responsive health professionals, and a coordinated, supportive health care environment<sup>11</sup>.  
18  
19

20 Seventeen studies included at least one of the three factors. Table 3 indicates the number of studies  
21 and some examples of approaches to patient-centred care for each of the three factors. The  
22 columns of the table indicate whether patient-centredness was included in the design,  
23 implementation, or analysis phase of patient navigation programs.  
24  
25  
26  
27  
28  
29  
30  
31  
32  
33  
34  
35  
36  
37  
38  
39  
40  
41  
42  
43  
44  
45  
46  
47  
48  
49  
50  
51  
52  
53  
54  
55  
56  
57  
58  
59  
60

Table 3 Examples of patient-centredness

| Patient-centred care factor                     | Design phase examples                                                                                                                           | Implementation phase examples                                                                                                                             | Analysis phase examples                                                                                                   | Total studies* |
|-------------------------------------------------|-------------------------------------------------------------------------------------------------------------------------------------------------|-----------------------------------------------------------------------------------------------------------------------------------------------------------|---------------------------------------------------------------------------------------------------------------------------|----------------|
| Patients informed and involved in their care    | 2 studies: user-friendly and culturally-sensitive health materials; bilingual, bicultural community members                                     | 17 studies: provided information to patient on difference between emergency and primary care; identified barriers to access and help to overcome barriers | 0 studies                                                                                                                 | 19             |
| Receptive and responsive health professionals   | 3 studies: clinics added capacity for walk-in appointments, navigator visited clinics to provide information and establish working relationship | 6 studies: after connection, navigator worked with provider to schedule other visits as per care plan; assisted with patient education and follow-up      | 2 studies: providers wanted to continue in program; information to providers more complete and accessible than previously | 11             |
| Coordinated, supportive health care environment | 4 studies: Collaborative organisation linked emergency department with 18 clinics; each hospital adopted unique                                 | 1 study: emergency physicians encouraged to establish relationships with clinics                                                                          | 1 study: community mobilized around population health issues through increased local media attention                      | 6              |

|  |                                      |  |  |  |
|--|--------------------------------------|--|--|--|
|  | provider arrangement<br>and approach |  |  |  |
|--|--------------------------------------|--|--|--|

\*Some studies included more than one instance of the patient-centred factor in more than one phase of the intervention

Of note, the Kangovi et al.<sup>49</sup> study had an explicit patient-centred focus. The intervention prioritised relationship building with patients through goal setting and development of action plans, liaising with inpatient staff to ensure the patient's goals were at the forefront, and giving the action plan to a provider the patient chose based on needs and preferences.

Similarly, in the three studies reporting the same randomized controlled trial, Griswold et al.<sup>39-41</sup> used a care navigator to connect patients with a history of psychiatric crisis to primary care. The navigator built relationships by meeting with patients routinely while admitted and also at primary care appointments, and maintaining regular contact via phone or in person. The navigator would take the patient to the appointment and reinforce any education provided. Patients were informed of low-cost clinics and further assistance was provided through coordinating follow-up and connecting patients to peer and social services. Provider resources included information to clinics on discharge diagnosis, medications and mental health treatment site referral.

Other studies included the three factors yet did not explicitly state patient-centredness as a driver.

## DISCUSSION

Our scoping review identified 20 studies that used patient navigation to facilitate access, and connect vulnerable patients without regular primary care, to a primary care provider. All except three studies used a *person* to connect the patient to a provider; the remaining three used a navigation *process*. Most programs described components that could be included in a framework of patient navigation, and 17 of the 20 studies included factors inherent to patient-centred care in their design, implementation or analysis.

1  
2  
3 The level of detail in descriptions of the studies varied; this variation has been reported elsewhere<sup>61</sup>.  
4  
5 In the studies included in this review, different terms were used for the same role: patient or care  
6  
7 navigator, advocate, case manager, or community health worker, for example. This presents  
8  
9 challenges in clearly characterizing navigators and understanding what they do. Similarly, while  
10  
11 there is no generally accepted definition of patient navigation, there is a call for descriptions of the  
12  
13 tasks navigators do and the networks of contacts they use to support their actions<sup>61</sup>. Valaitis et al.<sup>28</sup>  
14  
15 described the specific activities undertaken by patient navigators: facilitating access to health-  
16  
17 related programs, promoting and facilitating continuity of care, identifying and removing barriers to  
18  
19 care, and effective and efficient use of the health system. Our findings add to these activities: a key  
20  
21 feature of patient navigation to facilitate access to primary care is a relationship-based approach,  
22  
23 informing and involving patients in connecting them to care.  
24

25  
26  
27 The studies in this scoping review included elements that seemed to match the components of  
28  
29 Freeman's patient navigation framework. This indicates the framework may be generalizable to the  
30  
31 tasks of connecting vulnerable people without a primary care provider to regular care. An evaluation  
32  
33 of these principles used in 10 self-identified breast cancer navigation programs using observation of  
34  
35 patient navigator activities found the programs were consistent with individual-level principles (for  
36  
37 example eliminating barriers, patient-centred care, integration of care), however program-level  
38  
39 principles (for example skill level, scope of practice, coordinated system) were not consistent across  
40  
41 the programs. We did not examine this level of detail for our scoping review, however, can see a role  
42  
43 for this type of observation-based study to further contribute to this field.<sup>62</sup> Generally, programs  
44  
45 adhered to published criteria for patient-centred care<sup>11</sup>. Although not overtly stated as an aim,  
46  
47 almost all studies incorporated at least one of the three patient-centred care factors: an informed  
48  
49 and involved patient, receptive and responsive health professionals, and a coordinated, supportive  
50  
51 health care environment. We found these mostly in the implementation of the programs, to a lesser  
52  
53 degree in the design phase and mentioned in only three studies in the analysis.  
54  
55  
56  
57  
58  
59  
60

1  
2  
3 While these results are encouraging, patient-centred care also requires a service model designed to  
4 fit the patient, their needs and preferences, not vice versa<sup>63 64</sup>. A patient-centred, strengths-based  
5 intervention to link adults who are newly-diagnosed as testing positive for HIV to a HIV primary care  
6 medical provider found that 111 out of 118 participants attended an appointment within three  
7 months of linkage<sup>65</sup>. This intervention was targeted at participants' level of individual need,  
8 emphasising personal and social connectedness, and promoting positive regard for the primary care  
9 encounter as well as the health care system as a whole. These findings reflect the three patient-  
10 centred care factors discussed in our scoping review, and support our assertion that a navigator,  
11 working with patients unattached to primary care, is patient-centred, with a focus on connections  
12 and relationships, has some merit.  
13  
14  
15  
16  
17  
18  
19  
20  
21  
22  
23

24 This scoping review has several limitations. Although a scoping review is iterative and involves  
25 revisiting the research question and key terms during searches, our search strategy may have missed  
26 studies that reported on interventions not designed to connect people to primary care, but this  
27 connection may have been a secondary outcome of the intervention (for example, access to  
28 information on cancer screening may have prompted participants to link in with a primary care  
29 provider). Information in the title and abstracts of such studies may not have referred to primary  
30 care. This approach, however, allowed us to undertake a more targeted review. Similarly, while our  
31 search strategy sought to include all terms we determined could be synonymous with patient  
32 navigation, we may have missed studies where different names were used for the same function.  
33  
34  
35  
36  
37  
38  
39  
40  
41  
42  
43

44 Studies where there was no indication patients attended a primary care appointment were not  
45 included in our review. While this strategy contributed to a more focused search, studies that  
46 reported the implementation of programs but not outcomes are missing. In addition, all of our  
47 included studies originated in the United States which we acknowledge would impact on  
48 generalizability. These limitations highlight the need for consistent documentation of processes to  
49 improve access to care and the outcomes measured.  
50  
51  
52  
53  
54  
55  
56  
57  
58  
59  
60

1  
2  
3 We did not look for or report on the effectiveness of the interventions or programs in our included  
4  
5 studies. While we are unable to report on the impact, we consider our approach to looking at  
6  
7 descriptions and uses of patient navigation in this specific context of connection to primary care,  
8  
9 with a focus on patient-centred care, is consistent with the current focus on patient-reported  
10  
11 outcome measures and acknowledging the patient experience of care.  
12

13  
14 This paper contributes to the discussion of access to primary care by considering patient navigation  
15  
16 to connect vulnerable populations to providers in three ways. Firstly, we aligned components of the  
17  
18 patient navigation studies reviewed to an existing generic navigation framework. This framework  
19  
20 appears to be appropriate for considering navigators facilitating access for people without a primary  
21  
22 care provider to regular care. Secondly, a relational approach acts as the backdrop to connecting  
23  
24 vulnerable people to care, based on principles of patient-centred care. Finally, in the absence of a  
25  
26 consistent definition of patient navigation in facilitating access to primary care, we have added to an  
27  
28 existing description of patient navigation activities, which will assist clinicians and researchers to  
29  
30 design and implement similar programs.  
31

### 32 33 34 **Implications for practice**

35  
36 The studies included in the review used navigators in a range of settings, from emergency  
37  
38 departments, inpatient wards, outpatient services, and in the community. While we did not report  
39  
40 on the studies' effectiveness, we found that using patient navigation to improve access to primary  
41  
42 care may have merit, particularly using a navigator (person) rather than a process, such as an  
43  
44 electronic system. For providers and organisations wanting to link vulnerable people to primary care  
45  
46 in a patient-centred way, navigators may assist in this process.  
47

### 48 49 50 **Future research**

51  
52 Analysis of cost effectiveness, while not a focus of this review, was nevertheless absent in the cited  
53  
54 studies. As the concept of navigator continues to show promise, further research is required to  
55  
56  
57  
58  
59

1  
2  
3 measure impact and give direction to settings interested in using this intervention. For example, the  
4  
5 link between patient navigation principles and outcomes of interest require further exploration.  
6  
7

## 8 **CONCLUSION**

9  
10 Patient navigators may be used across health care settings to improve access to care. Navigators are  
11  
12 inherently patient-centred due to their relational approach and ability to connect people to primary  
13  
14 care. Interventions to improve access to primary care require further study to determine their  
15  
16 impact and cost-effectiveness.  
17  
18  
19  
20  
21  
22  
23  
24  
25  
26  
27  
28  
29  
30  
31  
32  
33  
34  
35  
36  
37  
38  
39  
40  
41  
42  
43  
44  
45  
46  
47  
48  
49  
50  
51  
52  
53  
54  
55  
56  
57  
58  
59  
60



## Acknowledgements

We wish to acknowledge the peer reviewers of the original version of this paper, who provided valued and insightful suggestions to improve the structure, flow, and clarity of this paper.

## Funding

This work was supported by The Professor Leon Piterman AM PhD Scholarship, Southern Academic Primary Care Research Group, Monash University.

## Competing interests

None declared.

## Contributors

AP involved in writing protocol, searches, screening, extraction, drafting of results and writing of manuscripts. VL and TB involved in content expert input (methodology) and editing manuscripts. GR oversaw the project, assisted with screening, content expert input, drafting of results and editing of manuscripts.

## Data sharing statement

Further details on studies included in this scoping review can be retrieved by contacting the corresponding author at [annette.peart@monash.edu](mailto:annette.peart@monash.edu).

## Figures

Figure 1: Flow of study selection.

## References

1. Schamess A, Foraker R, Kretovics M, et al. Reduced emergency room and hospital utilization in persons with multiple chronic conditions and disability receiving home-based primary care. *Disability and health journal* 2016;**10**(2):326-33.
2. Loignon C, Hudon C, Goulet É, et al. Perceived barriers to healthcare for persons living in poverty in Quebec, Canada: the EQUihealthY project. *International Journal for Equity in Health* 2015;**14**(1):4.

3. Ford JA, Wong G, Jones AP, et al. Access to primary care for socioeconomically disadvantaged older people in rural areas: a realist review. *BMJ open* 2016;**6**(5):e010652.
4. Davy C, Harfield S, McArthur A, et al. Access to primary health care services for Indigenous peoples: A framework synthesis. *International Journal for Equity in Health* 2016;**15**(1):163.
5. Levesque J-F, Harris MF, Russell G. Patient-centred access to health care: conceptualising access at the interface of health systems and populations. *Int J Equity Health* 2013;**12**:1-9.
6. McColl MA, Aiken A, Schaub M. Do people with disabilities have difficulty finding a family physician? *Int J Environ Res Public Health* 2015;**12**(5):4638-51.
7. Shi L, Lebrun-Harris LA, Daly CA, et al. Reducing disparities in access to primary care and patient satisfaction with care: The role of health centers. *J Health Care Poor Underserved* 2013;**24**(1):56-66.
8. Starfield B. *Primary care: balancing health needs, services, and technology*. New York: Oxford University Press, 1998.
9. Starfield B. Primary care: an increasingly important contributor to effectiveness, equity, and efficiency of health services. *SESPAS report* 2012. *Gac Sanit* 2012;**26**:20-26.
10. Janamian T, Jackson CL, Glasson N, et al. A systematic review of the challenges to implementation of the patient-centred medical home: lessons for Australia. *Med J Aust* 2014;**201**(3 Suppl):S69-73.
11. Epstein RM, Fiscella K, Lesser CS, et al. Why the nation needs a policy push on patient-centered health care. *Health Aff* 2010;**29**(8):1489-95.
12. Kelly E, Ivers N, Zawi R, et al. Patient navigators for people with chronic disease: protocol for a systematic review and meta-analysis. *Syst Rev* 2015;**4**(1):28.
13. Natale-Pereira A, Enard KR, Nevarez L, et al. The role of patient navigators in eliminating health disparities. *Cancer* 2011;**117**(S15):3541-50.
14. Jean-Pierre P, Hendren S, Fiscella K, et al. Understanding the processes of patient navigation to reduce disparities in cancer care: perspectives of trained navigators from the field. *J Cancer Educ* 2011;**26**(1):111-20.
15. Dennis S, Hasan I, Jackson Pulver L, et al. Experiences and views of a brokerage model for primary care for Aboriginal people. *Aust Health Rev* 2015;**39**(1):26-32.
16. Freeman HP. The origin, evolution, and principles of patient navigation. *Cancer Epidemiol Biomarkers Prev* 2012;**21**(10):1614-17.
17. Manderson B, McMurray J, Piraino E, et al. Navigation roles support chronically ill older adults through healthcare transitions: a systematic review of the literature. *Health Soc Care Community* 2012;**20**(2):113-27.
18. Glick SB, Clarke AR, Blanchard A, et al. Cervical cancer screening, diagnosis and treatment interventions for racial and ethnic minorities: a systematic review. *J Gen Intern Med* 2012;**27**(8):1016-32.
19. Tho PC, Ang E. The effectiveness of patient navigation programs for adult cancer patients undergoing treatment: a systematic review. *JBIR Database System Rev Implement Rep* 2016;**14**(2):295-321.
20. Tan CHH, Wilson S, McConigley R. Experiences of cancer patients in a patient navigation program: a qualitative systematic review. *JBIR Database System Rev Implement Rep* 2015;**13**(2):136-68.
21. Robinson-White S, Conroy B, Slavish KH, et al. Patient navigation in breast cancer: a systematic review. *Cancer Nurs* 2010;**33**(2):127-40.
22. Naylor K, Ward J, Polite BN. Interventions to improve care related to colorectal cancer among racial and ethnic minorities: a systematic review. *J Gen Intern Med* 2012;**27**(8):1033-46.
23. Genoff MC, Zaballa A, Gany F, et al. Navigating language barriers: a systematic review of patient navigators' impact on cancer screening for limited English proficient patients. *J Gen Intern Med* 2016;**31**(4):426-34.
24. Eschiti V, Burhansstipanov L, Watanabe-Galloway S. Native cancer navigation: the state of the science. *Clin J Oncol Nurs*, 2012:73-82.

- 1
- 2
- 3 25. Ranaghan C, Boyle K, Meehan M, et al. Effectiveness of a patient navigator on patient
- 4 satisfaction in adult patients in an ambulatory care setting: a systematic review. *JBI*
- 5 *Database System Rev Implement Rep* 2016;**14**(8):172-218.
- 6 26. Meredith SM. Disparities in breast cancer and the role of patient navigator programs. *Clin J Oncol*
- 7 *Nurs*, 2013:54-59.
- 8 27. Krok-Schoen JL, Oliveri JM, Paskett ED. Cancer care delivery and women's health: the role of
- 9 patient navigation. *Front Oncol* 2016;**6**(2).
- 10 28. Valaitis RK, Carter N, Lam A, et al. Implementation and maintenance of patient navigation
- 11 programs linking primary care with community-based health and social services: a scoping
- 12 literature review. *BMC Health Serv Res* 2017;**17**(1):116.
- 13 29. Medicine Io. *Crossing the quality chasm: a new health system for the 21st century*. Washington,
- 14 DC.: National Academies Press, 2001.
- 15 30. Epstein RM, Street RL. The values and value of patient-centered care. *Ann Fam Med*
- 16 2011;**9**(2):100-03.
- 17 31. Sidani S, Fox M. Patient-centered care: clarification of its specific elements to facilitate
- 18 interprofessional care. *J Interprof Care* 2014;**28**(2):134-41.
- 19 32. Constand MK, MacDermid JC, Dal Bello-Haas V, et al. Scoping review of patient-centered care
- 20 approaches in healthcare. *BMC Health Serv Res* 2014;**14**(1):1-9.
- 21 33. Cadzow RB, Craig M, Rowe J, et al. Transforming community members into diabetes cultural
- 22 health brokers: the Neighborhood Health Talker project. *Diabetes Educ* 2013;**39**(1):100-08.
- 23 34. Torres S, Spitzer DL, Labonté R, et al. Community health workers in Canada: innovative
- 24 approaches to health promotion outreach and community development among immigrant
- 25 and refugee populations. *J Ambul Care Manage* 2013;**36**(4):305-18.
- 26 35. Arksey H, O'Malley L. Scoping studies: towards a methodological framework. *Int J Social Res*
- 27 *Methodol* 2005;**8**(1):19-32.
- 28 36. Levac D, Colquhoun H, O'Brien KK. Scoping studies: advancing the methodology. *Implement Sci*
- 29 2010;**5**(1):1-9.
- 30 37. Wang ML, Gallivan L, Lemon SC, et al. Navigating to health: evaluation of a community health
- 31 center patient navigation program. *Prev Med Rep* 2015;**2**:664-68.
- 32 38. Parker VA, Lemak CH. Navigating patient navigation: crossing health services research and clinical
- 33 boundaries. *Bienn Rev Health Care Manage* 2011:149-83.
- 34 39. Griswold KS, Homish GG, Pastore PA, et al. A randomized trial: are care navigators effective in
- 35 connecting patients to primary care after psychiatric crisis? *Community Ment Health J*
- 36 2010;**46**(4):398-402.
- 37 40. Griswold KS, Servoss TJ, Leonard KE, et al. Connections to primary medical care after psychiatric
- 38 crisis. *J Am Board Fam Pract* 2005;**18**(3):166-72.
- 39 41. Griswold KS, Zayas LE, Pastore PA, et al. Primary care after psychiatric crisis: a qualitative analysis.
- 40 *Ann Fam Med* 2008;**6**(1):38-43.
- 41 42. Bishop S, Edwards, JM, Nadkarni, M. Charlottesville Health Access: a locality-based model of
- 42 health care navigation for the homeless. *J Health Care Poor Underserved* 2009;**20**(4):958-63.
- 43 43. Chan TC, Killeen JP, Castillo EM, et al. Impact of an internet-based emergency department
- 44 appointment system to access primary care at safety net community clinics. *Ann Emerg Med*
- 45 2009;**54**(2):279-84.
- 46 44. Doran KM, Colucci AC, Hessler RA, et al. An intervention connecting low-acuity emergency
- 47 department patients with primary care: effect on future primary care linkage. *Ann Emerg*
- 48 *Med* 2013;**61**(3):312-21.e7.
- 49 45. Elliott K, W. Klein J, Basu A, et al. Transitional care clinics for follow-up and primary care linkage
- 50 for patients discharged from the ED. *Am J Emerg Med* 2016;**34**(7):1230-35.
- 51 46. Gany F, Bari S, Gill P, et al. Step On It! Impact of a workplace New York City taxi driver health
- 52 intervention to increase necessary health care access. *Am J Public Health* 2015;**105**(4):786-
- 53 92.
- 54
- 55
- 56
- 57
- 58
- 59
- 60

- 1
- 2
- 3 47. Horwitz SM, Busch SH, Balestracci KMB, et al. Intensive intervention improves primary care
- 4 follow-up for uninsured emergency department patients. *Acad Emerg Med* 2005;**12**(7):647-
- 5 52.
- 6 48. Kahn LS, Aiello J, Berdine DE, et al. The use of telephonic case management to link a special-
- 7 needs population with a primary care physician. *J Am Board Fam Med* 2009;**22**(5):585-87.
- 8 49. Kangovi S, Mitra N, Grande D, et al. Patient-centered community health worker intervention to
- 9 improve posthospital outcomes: a randomized clinical trial. *JAMA Intern Med*
- 10 2014;**174**(4):535-43.
- 11 50. Kim TY, Mortensen K, Eldridge B. Linking uninsured patients treated in the emergency
- 12 department to primary care shows some promise in Maryland. *Health Aff* 2015;**34**(5):796-
- 13 804.
- 14 51. Marr AL, Pillow T, Brown S. Southside Medical Homes Network: linking emergency department
- 15 patients to community care. *Prehosp Disaster Med* 2008;**23**(3):282-84.
- 16 52. Overholser LS, Hassell K, Nuss R, et al. Using patient navigators to help adults with sickle cell
- 17 disease obtain a primary care home. *J Clin Outcomes Manage* 2014;**21**(7):304-07.
- 18 53. Treadwell H, Holden K, Hubbard R, et al. Addressing obesity and diabetes among African
- 19 American men: examination of a community-based model of prevention. *J Natl Med Assoc*
- 20 2010;**102**(9):794-802.
- 21 54. Wexler R, Hefner, JL, Sieck, C, Taylor, CA, Lehman, J, Panchal, AR, Aldrich, A, McAlearney, AS.
- 22 Connecting emergency department patients to primary care. *J Am Board Fam Med*
- 23 2015;**28**(6):722-32.
- 24 55. ED navigators connect patients to better venues of care. *ED Manage* 2011;**May**:53-55.
- 25 56. Aantjes C, Quinlan T, Bunders J. Integration of community home based care programmes within
- 26 national primary health care revitalisation strategies in Ethiopia, Malawi, South-Africa and
- 27 Zambia: a comparative assessment. *Globalization & Health* 2014;**10**(1):85-85 1p.
- 28 57. ED navigators help patients find a PCP. *Hosp Case Manage* 2014;**22**(1):9-10.
- 29 58. Freeman HP. The history, principles, and future of patient navigation: commentary. *Semin Oncol*
- 30 *Nurs* 2013;**29**(2):72-75.
- 31 59. Freeman HP, Rodriguez RL. History and principles of patient navigation. *Cancer*
- 32 2011;**117**(S15):3537-40.
- 33 60. Gunn CM, Clark JA, Battaglia TA, et al. An assessment of patient navigator activities in breast
- 34 cancer patient navigation programs using a nine-principle framework. *Health Serv Res*,
- 35 2014:1555-77.
- 36 61. Parker VA, Clark JA, Leyson J, et al. Patient navigation: development of a protocol for describing
- 37 what navigators do. *Health Serv Res*, 2010:514+.
- 38 62. Gunn CM, Clark JA, Battaglia TA, et al. An assessment of patient navigator activities in breast
- 39 cancer patient navigation programs using a nine-principle framework. *Health Serv Res*,
- 40 2014:1555+.
- 41 63. Mirzaei M, Aspin C, Essue B, et al. A patient-centred approach to health service delivery:
- 42 improving health outcomes for people with chronic illness. *BMC Health Serv Res*
- 43 2013;**13**(1):251.
- 44 64. Law M, Baptiste S, Mills J. Client-Centred Practice: What does it Mean and Does it Make a
- 45 Difference? *Canadian Journal of Occupational Therapy* 1995;**62**(5):250-57.
- 46 65. Bendetson J, Dierst-Davies R, Flynn R, et al. Evaluation of a Client-Centered Linkage Intervention
- 47 for Patients Newly Diagnosed with HIV at an Urban United States LGBT Center: The Linkage
- 48 to Care Specialist Project. *AIDS Patient Care STDS* 2017;**31**(7):283-89.
- 49
- 50
- 51
- 52
- 53
- 54
- 55
- 56
- 57
- 58
- 59

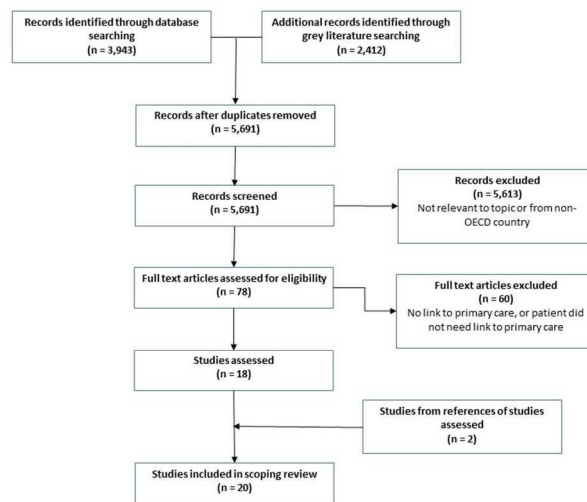

Figure 1. Flow of study selection.

108x60mm (300 x 300 DPI)

Review only

1  
2  
3  
4  
5  
6  
7  
8  
9  
10  
11  
12  
13  
14  
15  
16  
17  
18  
19  
20  
21  
22  
23  
24  
25  
26  
27  
28  
29  
30  
31  
32  
33  
34  
35  
36  
37  
38  
39  
40  
41  
42  
43  
44  
45  
46  
47  
48  
49  
50  
51  
52  
53  
54  
55  
56  
57  
58  
59  
60

## Supplementary File 1

### Databases searched

MEDLINE/PubMed

Embase

CINAHL

AMED

PsycINFO

Cochrane Library

Scopus

Web of Science Core Collection

ProQuest Dissertations & Theses

CIRRIE

PLoS

ProQuest Central

### Grey literature sources

Agency for Healthcare Research and Quality National Guideline Clearinghouse

<http://www.guideline.gov>

Australian Commission on Safety and Quality in Health Care <http://www.safetyandquality.gov.au>

Australian Government Department of Health <http://www.health.gov.au>

Australian Institute of Health and Welfare <http://www.aihw.gov.au>

British Library E-theses Online Service <http://ethos.bl.uk/Home.do>

Canadian Institute for Health Information <https://www.cihi.ca/en>

Canadian Institutes of Health Research <http://www.cihr-irsc.gc.ca/e/193.html>

Centers for Disease Control and Prevention Wonder database <http://wonder.cdc.gov/welcome.html>

1  
2  
3 Commonwealth Fund <http://www.commonwealthfund.org/>  
4

5  
6 European Observatory on Health Systems and Policies [http://www.euro.who.int/en/about-](http://www.euro.who.int/en/about-us/partners/observatory)  
7  
8 [us/partners/observatory](http://www.euro.who.int/en/about-us/partners/observatory)  
9

10  
11 Health Improvement and Innovation Resource Center <http://www.hiirc.org.nz>  
12

13  
14 Health Issues Center <http://www.healthissuescenter.org.au>  
15

16  
17 Health Systems Evidence <http://www.healthsystemsevidence.org/>  
18

19  
20 Institute for Clinical Evaluative Sciences <http://www.ices.on.ca/>  
21

22  
23 Institute for Healthcare Improvement <http://www.ihl.org/Pages/default.aspx>  
24

25  
26 Kings Fund <http://www.kingsfund.org.uk/>  
27

28  
29 MacColl Center for Health Care Innovation <http://maccollcenter.org/>  
30

31  
32 National Collaborating Centers for Public Health <http://www.nccph.ca/2/home.ccnsp>  
33

34  
35 National Institute for Health and Care Excellence <https://www.nice.org.uk/>  
36

37  
38 National Institute for Health and Care Excellence Evidence Search <http://www.evidence.nhs.uk>  
39

40  
41 National Library of Australia Trove <http://trove.nla.gov.au>  
42

43  
44 National Quality Forum <http://www.qualityforum.org/Home.aspx>  
45

46  
47 Networked Digital Library of Theses and Dissertations <http://ndltd.org>  
48

49  
50 New Zealand Ministry of Health <http://www.health.govt.nz>  
51

52  
53 New Zealand Social Policy Evaluation and Research Unit <http://www.superu.govt.nz>  
54

55  
56 NHS Sustainable Improvement Team (formerly Improving Quality) <http://www.nhsiq.nhs.uk/>  
57  
58  
59  
60

1  
2  
3 Nuffield Trust <http://www.nuffieldtrust.org.uk/>  
4

5  
6 Open Grey <http://opengrey.eu>  
7

8  
9 Primary Health Care Research and Information Service <http://www.phcris.org.au/researchevidence/>  
10

11  
12 Public Health Agency of Canada <http://www.phac-aspc.gc.ca/index-eng.php>  
13

14  
15 Robert Wood Johnson Foundation <http://www.rwjf.org/>  
16

17  
18 The Change Foundation <http://www.changefoundation.com/>  
19

20  
21 The Health Foundation <http://www.health.org.uk>  
22

23  
24 The Henry J. Kaiser Family Foundation <http://kff.org/>  
25

26  
27 The National Academies of Sciences Engineering Medicine, Health and Medicine Division  
28  
29 <http://www.nationalacademies.org/hmd/>  
30

31  
32 The New York Academy of Medicine Grey Literature Report <http://www.greylit.org/>  
33

34  
35 Theses Canada <http://www.bac-lac.gc.ca/eng/services/theses/Pages/theses-canada.aspx>  
36

37  
38 US National Library of Medicine Health Services Research Projects in Progress  
39  
40 [http://wwwcf.nlm.nih.gov/hsr\\_project/home\\_proj.cfm](http://wwwcf.nlm.nih.gov/hsr_project/home_proj.cfm)  
41

42  
43 World Health Organization Primary Health Care  
44

45  
46 [http://www.who.int/topics/primary\\_health\\_care/en/](http://www.who.int/topics/primary_health_care/en/)  
47  
48  
49  
50  
51  
52  
53  
54  
55  
56  
57  
58  
59  
60



## Supplementary File 2: Boolean search strategy

Database name and provider: OVID Medline

Search conducted by the first author on 27 April 2016

| Search # | Search term (titles and abstracts, years searched 2000 – April 2016) | Hits  |
|----------|----------------------------------------------------------------------|-------|
| 1        | Broker*                                                              | 1010  |
| 2        | Health broker*                                                       | 7     |
| 3        | Health service* broker                                               | 0     |
| 4        | Community health worker*                                             | 2204  |
| 5        | Community navigat*                                                   | 18    |
| 6        | Peer navigat*                                                        | 27    |
| 7        | Patient navigat*                                                     | 463   |
| 8        | Lay health work*                                                     | 184   |
| 9        | Link* to care                                                        | 800   |
| 10       | Navigat*                                                             | 21928 |
| 11       | 1 or 2 or 3 or 4 or 5 or 6 or 7 or 8 or 9 or 10                      | 26012 |
| 12       | Family practi*                                                       | 8493  |
| 13       | General practi*                                                      | 33546 |
| 14       | Primary care                                                         | 79085 |
| 15       | Primary health care                                                  | 15589 |
| 16       | Community health*                                                    | 16307 |

|    |                                                                                   |        |
|----|-----------------------------------------------------------------------------------|--------|
| 17 | 12 or 13 or 14 or 15 or 16                                                        | 139643 |
| 18 | 11 and 17                                                                         | 2742   |
| 19 | Limit 18 to (abstracts and English language and humans and yr="2000 –<br>Current" | 2194   |

For peer review only

# BMJ Open

## Patient navigators facilitating access to primary care: A scoping review

|                                 |                                                                                                                                                                                                                                                                                                                                         |
|---------------------------------|-----------------------------------------------------------------------------------------------------------------------------------------------------------------------------------------------------------------------------------------------------------------------------------------------------------------------------------------|
| Journal:                        | <i>BMJ Open</i>                                                                                                                                                                                                                                                                                                                         |
| Manuscript ID                   | bmjopen-2017-019252.R2                                                                                                                                                                                                                                                                                                                  |
| Article Type:                   | Research                                                                                                                                                                                                                                                                                                                                |
| Date Submitted by the Author:   | 06-Feb-2018                                                                                                                                                                                                                                                                                                                             |
| Complete List of Authors:       | Peart, Annette; Monash University, Department of General Practice; Monash University<br>Lewis, Virginia; La Trobe University, Australian Institute for Primary Care and Aging<br>Brown, Ted; Monash University, School of Primary and Allied Health Care<br>Russell, Grant; Monash University, School of Primary and Allied Health Care |
| <b>Primary Subject Heading</b>: | General practice / Family practice                                                                                                                                                                                                                                                                                                      |
| Secondary Subject Heading:      | Patient-centred medicine                                                                                                                                                                                                                                                                                                                |
| Keywords:                       | Access to Health Care, Patient Navigation, Patient-Centred Care, PRIMARY CARE                                                                                                                                                                                                                                                           |
|                                 |                                                                                                                                                                                                                                                                                                                                         |

SCHOLARONE™  
Manuscripts

View Only

## Title page

### Title of the article

Patient navigators facilitating access to primary care: A scoping review

### Corresponding author

Annette Peart

Southern Academic Primary Care Research Unit, Department of General Practice, School of Primary  
and Allied Health Care

Monash University

Building 1, 270 Ferntree Gully Road

Notting Hill, 3168, Australia

E-mail [annette.peart@monash.edu](mailto:annette.peart@monash.edu)

Telephone +61 3 9902 4899

Fax +61 3 9902 4300

### Co-authors

Virginia Lewis, Australian Institute for Primary Care & Ageing, La Trobe University, Bundoora,  
Australia

Ted Brown, Department of Occupational Therapy, Monash University, Frankston, Australia

Grant Russell, Southern Academic Primary Care Research Unit, Monash University, Notting Hill,  
Australia

1  
2  
3 **Key words**  
4

5 Access to health care, Patient navigation, Patient-centred care, Primary care  
6

7 **Word count**  
8

9  
10 3,224  
11  
12  
13  
14  
15  
16  
17  
18  
19  
20  
21  
22  
23  
24  
25  
26  
27  
28  
29  
30  
31  
32  
33  
34  
35  
36  
37  
38  
39  
40  
41  
42  
43  
44  
45  
46  
47  
48  
49  
50  
51  
52  
53  
54  
55  
56  
57  
58  
59  
60

For peer review only

## Abstract

### Objective

Patient navigators are a promising mechanism to link patients with primary care. While navigators have been used in population health promotion and prevention programs, their impact on access to primary care is not clear. The aim of this scoping review was to examine the use of patient navigators to facilitate access to primary care; how they were defined and described, their components, and the extent to which they were patient-centred.

### Setting and Participants

We used the Arksey and O'Malley scoping review method. Searches were conducted in MEDLINE, Embase, ProQuest Medical, other key databases, and grey literature, for studies reported in English from January 2000 – April 2016. We defined a patient navigator as a person or process creating a connection or link between a person needing primary care and a primary care provider. Our target population was people without a regular source of, affiliation or connection with primary care. Studies were included if they reported on participants who were connected to primary care by patient navigation, and attended or made an appointment with a primary care provider. Data analysis involved descriptive numerical summaries and content analysis.

### Results

Twenty studies were included in the final scoping review. Most studies referred to “patient navigator” or “navigation” as the mechanism of connection to primary care. As such, we grouped the components according to Freeman’s nine-principle framework of patient navigation. Seventeen studies included elements of patient-centred care: informed and involved patient, receptive and responsive health professionals, and a coordinated, supportive health care environment.

## Conclusions

Patient navigators may assist to connect people requiring primary care to appropriate providers and extend the concept of patient-centred care across different health care settings. Navigation requires further study to determine impact and cost-effectiveness, and explore the experience of patients and their families.

For peer review only

## Article summary

### Strengths and limitations of this study

- This is the first scoping review to explore how patient navigators are defined, described and used to facilitate access to primary care for people without an affiliation to a primary care provider.
- It is a comprehensive overview of sources covering peer-reviewed and grey literature.
- Sources were included only if the outcome of the navigation was reported; sources describing patient navigation without reporting of outcomes were excluded.
- The inclusion of a description of the patient-centredness of the sources is a unique addition to this review of patient navigators.



## INTRODUCTION

Primary care is the first level of access to health care, delivered in the community most often by family physicians or general medical practitioners. However, not all people access primary care that best meets their health care needs, where and when they need it. Some people, such as those living in poverty, with a long-term disability, from a culturally and linguistically diverse background, or located in rural and remote areas, have difficulty accessing primary care services and resources<sup>1-4</sup>.

Access to health care is the opportunity to reach and obtain appropriate health care in situations of perceived need<sup>5</sup>. Access to primary care is important to reduce health care disparities, mortality, morbidity, hospitalisation rates, and health care costs<sup>6-9</sup>. Recent reforms to primary care have focused on trialling new processes and models of care to improve access<sup>10</sup>. These include integrated care models, after-hours telephone consultations, walk-in centres and nurse-led initiatives. However, disparities in care remain for many, such as people having low literacy and numeracy, cognitive deficits, being a member of a marginalized group or not understanding the need for primary care<sup>11</sup>.

A new approach to improve access to primary care is *patient navigation*, a process where a person (navigator) engages with a patient to determine barriers to care and provides information to improve access to components of the health system, not just primary care<sup>12</sup>. A patient navigator has been described as a type of 'broker', who uses a biopsychosocial approach to provide a range of instrumental and relational functions and processes<sup>13 14</sup> to not only support patients to access primary care but directly identify providers willing to treat vulnerable people requiring care<sup>15</sup>.

Patient navigator tasks can include educating patients about early symptoms of cancer (in preventive care) or facilitating and coordinating appointments with providers to improve access to a regular primary care provider. Originating in the 1990s, Freeman developed patient navigation as a strategy to reduce barriers to breast cancer care in Harlem, New York<sup>16</sup>. Since then, patient navigators have been used for the screening of various cancers and through the cancer care continuum, with mixed success<sup>17-27</sup>. In primary care, navigators may have a role in improving access

1  
2  
3 and coordination of care, especially for vulnerable populations whose access to care may be  
4 compromised by a range of geographic, demographic, socioeconomic or cultural characteristics<sup>28</sup>.

5  
6  
7 Patient-centred care is a core element of high-quality primary care, facilitates access to appropriate  
8 care<sup>11</sup>, and has been identified as one of six areas of focus for improving health care systems<sup>29</sup>. In  
9 primary care, patient-centred care consists of interactions and relationships between providers and  
10 patients to share information, explore values and preferences, facilitate access to appropriate care,  
11 and address health care disparities<sup>30 31</sup>. While numerous frameworks of patient-centred care have  
12 been described<sup>32</sup>, Epstein's<sup>11</sup> succinct model of patient-centred care comprising: an informed and  
13 involved patient, receptive and responsive health professionals, and a coordinated, supportive  
14 health care environment, sits well within the context of patient navigation and its extension beyond  
15 the patient-clinician relationship to the setting in which care is delivered.

16  
17  
18 While navigators have been used in population health promotion and prevention programs<sup>33 34</sup>,  
19 there has been recent interest in their use in facilitating access to primary care for vulnerable people  
20 without a regular primary care provider<sup>28</sup>. Understanding the components of these programs can  
21 assist those interested in designing or implementing similar programs. Therefore, we performed a  
22 scoping review of the use of patient navigation to facilitate access to primary care. Given its  
23 importance and relevance to navigation, we included an additional focus on the extent to which  
24 identified patient navigation interventions were patient-centred.

## 25 26 27 **METHODS**

28  
29 We chose the scoping review method to map the extent, range and nature of published research on  
30 the use of patient navigation to further understand how it links people to primary care<sup>35</sup>. When  
31 compared to systematic reviews, scoping reviews address broader topics and are less reliant on  
32 detailed research questions or quality assessments<sup>35</sup>. The work was structured around the five  
33 stages of the Arksey and O'Malley framework: (1) identify the research question, (2) identify  
34 relevant studies, (3) study selection, (4) chart the data, and (5) collate, summarize and report the  
35

1  
2  
3 results. The review was also informed by Levac et al's.<sup>36</sup> refinements to Arksey and O'Malley's  
4  
5 framework.

### 6 7 8 **Stage 1: Identify the research question**

9  
10 Patient navigation has been defined as a "process, by which an individual, a patient navigator, guides  
11  
12 patients in overcoming barriers to health care services access to facilitate timely access to care"<sup>37</sup>.

13  
14 We expanded this definition to include a patient navigator as a person or process creating a  
15  
16 connection or link between a person needing primary care and a primary care provider.

17  
18 Our target population was people without a regular source of or affiliation or connection with  
19  
20 primary care. The outcome of interest was the person needing care attended an appointment or  
21  
22 made contact with the referred primary care provider. These definitions helped us to clarify the  
23  
24 focus of the review, confirm the inclusion criteria adopted and establish parameters for the search  
25  
26 strategy<sup>36</sup>. This review did not focus on the impact or effectiveness of patient navigation programs in  
27  
28 this context. We asked three questions to guide the scoping review:  
29  
30

- 31  
32 1. How have patient navigators been defined and described in connecting people who are  
33  
34 unattached to primary care to a primary care provider for regular care?
- 35  
36 2. What are the components of these patient navigation programs?
- 37  
38 3. To what extent has patient-centredness been incorporated into the design, implementation  
39  
40 and analysis of patient navigation programs?  
41  
42  
43

### 44 **Stage 2: Identify relevant studies**

45  
46 We identified relevant studies through a search of electronic databases, grey literature, and  
47  
48 reference lists of key articles sourced (Supplementary File 1).  
49  
50

51  
52 A three-step search strategy was used. Firstly, we undertook an initial limited search of MEDLINE,  
53  
54 Embase and CINAHL using terms and variants of "navigator", "broker", "link worker" and  
55  
56 "community health worker". We analysed the text in the titles and abstracts of retrieved studies and  
57  
58  
59

1  
2  
3  
4  
5  
6  
7  
8  
9  
10  
11  
12  
13  
14  
15  
16  
17  
18  
19  
20  
21  
22  
23  
24  
25  
26  
27  
28  
29  
30  
31  
32  
33  
34  
35  
36  
37  
38  
39  
40  
41  
42  
43  
44  
45  
46  
47  
48  
49  
50  
51  
52  
53  
54  
55  
56  
57  
58  
59  
60

index terms used to refine key terms. The terms most common were related to *navigation, linkage,* and *access to care*. We completed a second search of the same databases and extended the search to include related medical and social science databases and grey literature using the key terms and variants (Table 1) identified by the initial search strategy (Supplementary File 2).

For peer review only

Table 1: Key search terms

| Concept, program or intervention | Setting                       |
|----------------------------------|-------------------------------|
| Navigator/navigation             | Community health              |
| Patient navigator/navigation     | Family practice/practitioner  |
| Peer navigator/navigation        | General practice/practitioner |
| Broker                           | Primary care                  |
| Health broker                    | Primary health care           |
| Health services broker           |                               |
| Community health worker          |                               |
| Community navigator/navigation   |                               |
| Lay health worker                |                               |
| Linkage to care                  |                               |

Finally, we checked the reference lists of all identified studies (and their citations) for additional studies.

### Stage 3: Study selection

Inclusion criteria were applied as a basis for which studies were considered relevant to the review questions. Studies were included if they:

- Were published in English from January 2000-May 2016. The start date of 2000 reflects the increasing interest in patient-centred care in the last two decades. Reforms of primary care commenced around this time<sup>29</sup> along with the emergence of navigator-type approaches<sup>38</sup>;
- Reported on patients who did not have a regular source of primary care (provider or practice);
- Connected patients to primary care by a process (for example, navigation) or a person (for example, navigator); and,

- Reported an outcome of patients attending or making at least one appointment with primary care providers.

We excluded studies if they originated in countries who were not members of the Organisation for Economic Cooperation and Development (OECD), as their primary care systems differ significantly from those of OECD countries. Other exclusion criteria were applied to studies where:

- Patients lived in residential care, or incarcerated with no imminent release date, as their primary care needs were assumed to be met by institutional providers;
- A navigator was attached to a primary care provider or practice as this indicated the patient was already connected to primary care; and,
- A navigator referred patients to health screening or assessment services only, and not to a primary care provider.

Author 1 reviewed titles and abstracts of studies, and Author 4 independently reviewed abstracts where there was uncertainty for inclusion.

#### **Stage 4: Chart the data**

Data extracted was entered into a template developed in Microsoft Excel specifically for this review. Information on authors, year of publication, study location and context, aims or purpose of the research, study type or design, population and sample size, methodology, conceptual model, intervention type and duration, measures used, and key findings were recorded on this form. We also extracted data relevant to the research questions: definitions and descriptions of navigators, components of navigator programs, and elements of patient-centred care. Charting the data was an iterative process<sup>36</sup> that we updated as studies revealed useful data categories. Studies were reviewed a number of times to ensure all relevant data was captured.

### Stage 5: Collate, summarize and report the results

We collated the data using a Microsoft Excel spreadsheet. Excerpts of text were coded deductively by Author 1 to identify concepts and themes related to the research questions. Author 4 checked the coding scheme and the themes raised.

## RESULTS

Our initial search terms generated 6,355 records from electronic databases and grey literature (Figure 1). We removed 664 duplicates, leaving 5,691 records to be screened. Of these, 5,613 records were excluded based on the title and/or abstract review, as they were not relevant to the question, did not meet inclusion criteria, or originated in non-OECD countries. Of the remaining 78 records, full-text review excluded 44 where participants were not linked to primary care and 16 where participants already had a primary care provider or did not indicate a need for primary care. We searched references and citations of the remaining 18 records, adding two additional studies. This resulted in 20 selected for inclusion in the scoping review. The selection process is shown in the flow chart (Figure 1).

Of the 20 included studies, three reported on the same randomized controlled trial at different phases<sup>39-41</sup>. These three studies were counted as unique studies as each reported on different elements of the same trial: preliminary findings, qualitative analysis of interviews, and longitudinal findings.

Eleven studies were descriptions or evaluations of programs, eight were intervention studies, and one was a retrospective study. Thirteen were programs based in emergency departments, six were community-based programs, and one was delivered in an inpatient setting. All studies were conducted in the United States. Table 2 outlines characteristics of the included studies.

1  
2  
3  
4  
5  
6  
7  
8  
9  
10  
11  
12  
13  
14  
15  
16  
17  
18  
19  
20  
21  
22  
23  
24  
25  
26  
27  
28  
29  
30  
31  
32  
33  
34  
35  
36  
37  
38  
39  
40  
41  
42  
43  
44  
45  
46  
47

Table 2 Characteristics of included studies

| Author               | Context                                                                      | Study type                                                                                               | Population and sampling                                                                                                                  | Primary outcome                                       | Description                                                                                                                                                                                                                                                                               |
|----------------------|------------------------------------------------------------------------------|----------------------------------------------------------------------------------------------------------|------------------------------------------------------------------------------------------------------------------------------------------|-------------------------------------------------------|-------------------------------------------------------------------------------------------------------------------------------------------------------------------------------------------------------------------------------------------------------------------------------------------|
| Bishop <sup>42</sup> | Private, non-profit, community homeless shelter                              | Description of Charlottesville Health Access initiative to enhance access to care                        | Homeless and near-homeless people, without a health care provider, attending health fair at shelter or soup kitchen (no sample reported) | People connected to permanent health care provider    | <i>Volunteer navigator</i> (student or community member) completed a training course, engaged person by building relationships, assessed needs, guided to providers, translated confusing information, coordinated follow-up, empowered people to understand health system and self-care. |
| Chan <sup>43</sup>   | Emergency department in low-income, urban area served by 3 community clinics | Non-randomized, non-blinded interventional trial to improve primary care access for underserved patients | Patients with no primary care provider assessed by emergency physician to benefit from clinic                                            | Patients follow-up at community clinic within 14 days | <i>Internet-based secure referral system</i> between emergency department medical record and clinic appointment systems. System accessed clinic availability and                                                                                                                          |



|                       |                                                                                                           |                                                                                           |                                                                                                                                                                                 |                                                         |                                                                                                                                                                                                                                  |
|-----------------------|-----------------------------------------------------------------------------------------------------------|-------------------------------------------------------------------------------------------|---------------------------------------------------------------------------------------------------------------------------------------------------------------------------------|---------------------------------------------------------|----------------------------------------------------------------------------------------------------------------------------------------------------------------------------------------------------------------------------------|
|                       |                                                                                                           |                                                                                           | follow-up (n=326)                                                                                                                                                               |                                                         | allowed emergency physicians to give patients follow-up appointments at clinics.                                                                                                                                                 |
| Doran <sup>44</sup>   | Urban, public, safety-net hospital emergency department with primary care clinic in same building complex | Quasi-experimental trial to navigate willing patients from emergency department to clinic | Adults with no primary care provider, presenting with low-acuity problems, assigned to intervention or usual care based on where care expected to result in least delay (n=965) | Patients follow-up at primary care clinic within 1 year | <i>Trained patient navigator</i> escorted patients from emergency waiting room to clinic. Patients assigned physician who addressed current problems, established care plan and gave card with name and clinic telephone number. |
| Elliott <sup>45</sup> | Urban emergency department, serving high proportion of vulnerable                                         | Retrospective study using full electronic medical record                                  | Patients with no primary care provider, discharged and                                                                                                                          | Patient completed follow-up visit in transitional care  | <i>Transitional care clinic</i> staff worked with patients to determine preferences and locate convenient,                                                                                                                       |

1  
2  
3  
4  
5  
6  
7  
8  
9  
10  
11  
12  
13  
14  
15  
16  
17  
18  
19  
20  
21  
22  
23  
24  
25  
26  
27  
28  
29  
30  
31  
32  
33  
34  
35  
36  
37  
38  
39  
40  
41  
42  
43  
44  
45  
46  
47

|                           |                                                                                                                                                                       |                                                                                                                   |                                                                                                                              |                                                                       |                                                                                                                                                                                                                                                                            |
|---------------------------|-----------------------------------------------------------------------------------------------------------------------------------------------------------------------|-------------------------------------------------------------------------------------------------------------------|------------------------------------------------------------------------------------------------------------------------------|-----------------------------------------------------------------------|----------------------------------------------------------------------------------------------------------------------------------------------------------------------------------------------------------------------------------------------------------------------------|
|                           | patients                                                                                                                                                              | abstraction, randomly sampled                                                                                     | referred to transitional care clinic (n=660)                                                                                 | clinic as scheduled                                                   | appropriate provider and made new appointment with chosen provider.                                                                                                                                                                                                        |
| Gany <sup>46</sup>        | Unused parking lot adjacent to JFK International Airport's taxi holding lot                                                                                           | Description of Step On It! workplace intervention to increase health care access                                  | Convenience sample of taxi drivers waiting in airport holding lot (n=466)                                                    | Driver completed follow-up visit with linked provider within 6 months | Health care access and <i>case management</i> to link drivers to providers, including referrals to low-cost (or free) culturally-appropriate clinics or hospitals.                                                                                                         |
| Griswold <sup>39-41</sup> | Urban Comprehensive Psychiatric Emergency Program (psychiatric assessment and management, targeted therapeutic approaches, links to community mental health services) | Randomized controlled trial comparing linkage with primary care with usual care after psychiatric emergency visit | Adults presenting with psychiatric disorder, with no primary care provider or, have not seen one within 6 months (n=101-175) | Patients connected to and visited primary care within 3 and 12 months | <i>Care navigator</i> trained in interviewing and case management provided information about low-cost care; facilitated access, reinforced patient education, information to providers about patient's history, follow-up, peer connections to access community and social |

|                       |                                                                                                   |                                                                                                          |                                                                                                                                          |                                                                                 |                                                                                                                                                                                                                               |
|-----------------------|---------------------------------------------------------------------------------------------------|----------------------------------------------------------------------------------------------------------|------------------------------------------------------------------------------------------------------------------------------------------|---------------------------------------------------------------------------------|-------------------------------------------------------------------------------------------------------------------------------------------------------------------------------------------------------------------------------|
|                       | as usual care                                                                                     |                                                                                                          |                                                                                                                                          |                                                                                 | services.                                                                                                                                                                                                                     |
| Horwitz <sup>47</sup> | Level 1 urban trauma centre                                                                       | Randomized study of intensive case management intervention to improve primary care use                   | Uninsured adults presenting to emergency department, excluding substance abuse or mental health issues only (n=230)                      | Patients visited one of four participating primary care clinics within 2 months | <i>Health Promotion Advocates</i> in emergency department assisted patients to choose provider, gave brochure, faxed information to case worker at selected clinic. Clinic case worker contacted patient to make appointment. |
| Kahn <sup>48</sup>    | Medicaid managed care organisation for people with mental health and/or substance abuse diagnoses | Evaluation to assess effectiveness of case management in linking new members with primary care providers | New members with behavioural health diagnosis and no primary care provider completing mailed survey, referred to case management (n=368) | Member visited primary care provider within 12 months                           | <i>Telephone case managers</i> made at least 3 contact attempts to ensure linkage to provider.                                                                                                                                |

1  
2  
3  
4  
5  
6  
7  
8  
9  
10  
11  
12  
13  
14  
15  
16  
17  
18  
19  
20  
21  
22  
23  
24  
25  
26  
27  
28  
29  
30  
31  
32  
33  
34  
35  
36  
37  
38  
39  
40  
41  
42  
43  
44  
45  
46  
47

|                       |                                                                                               |                                                                                                                   |                                                                                                                                                    |                                                                             |                                                                                                                                                                                                                                    |
|-----------------------|-----------------------------------------------------------------------------------------------|-------------------------------------------------------------------------------------------------------------------|----------------------------------------------------------------------------------------------------------------------------------------------------|-----------------------------------------------------------------------------|------------------------------------------------------------------------------------------------------------------------------------------------------------------------------------------------------------------------------------|
| Kangovi <sup>49</sup> | 2 urban, academically-affiliated hospitals                                                    | 2-armed, single-blind, randomized clinical trial to improve primary care follow-up post-discharge                 | Newly-admitted low-income, uninsured, or Medicaid adult inpatients randomly numbered, approached until 3 per day enrolled (n=446)                  | Patient completed follow-up visit with primary care provider within 14 days | <i>Community health workers</i> (trained lay people of similar backgrounds to patients, selected for personality traits patients identified as important) set goals, supported goal achievement, connected to provider.            |
| Kim <sup>50</sup>     | 5 hospital emergency departments in an affluent area with large and poor immigrant population | Analysis of Emergency Department-Primary Care Connect initiative to link patients to 4 local primary care clinics | Merged data set (hospital discharge, clinic, navigator referral data) of low-income or uninsured patients with no primary care provider (n=10,761) | Patients completed 2 or more visits to same clinic across 33 month period   | <i>Patient navigators</i> of various backgrounds (most unlicensed, selected for communication skills) based in clinics (3 sites) or hospitals (2 sites) spoke face-to-face or telephoned patients referred by emergency providers. |
| Marr <sup>51</sup>    | Urban emergency                                                                               | Evaluation of program                                                                                             | Patients with no                                                                                                                                   | Patients                                                                    | <i>Patient navigator</i> (advocate)                                                                                                                                                                                                |

For peer review only

|                          |                                                                                                       |                                                                                        |                                                                                                                                           |                                                                  |                                                                                                                                                                                                                                              |
|--------------------------|-------------------------------------------------------------------------------------------------------|----------------------------------------------------------------------------------------|-------------------------------------------------------------------------------------------------------------------------------------------|------------------------------------------------------------------|----------------------------------------------------------------------------------------------------------------------------------------------------------------------------------------------------------------------------------------------|
|                          | department with high rates of potentially avoidable hospitalizations and lack of community-based care | to connect patients with community-based, primary care providers                       | primary care provider approached by navigator (n=7,185)                                                                                   | completed 3 or more visits to same clinic across 18 month period | recruited from community, trained in emergency department, visited patients waiting for medical care or before discharge, offered referral within 18-clinic system.                                                                          |
| Overholser <sup>52</sup> | Specialist outpatient clinics of urban tertiary teaching hospital                                     | Description of patient navigation program to overcome barriers to finding primary care | Adults with sickle cell disease with no primary care provider or not seen regularly by provider, referred by specialist physicians (n=21) | Patients attended initial visit with new primary care provider   | <i>Patient navigators</i> of various backgrounds trained in navigation proactively sought local providers and established network through outreach, made appointments with patients, sent reminders, educated on importance of primary care. |
| Treadwell <sup>53</sup>  | African-American community centre.                                                                    | Evaluation of Save Our Sons group health education and                                 | African American men at risk for or diagnosed with                                                                                        | Participants connected to medical home                           | 6-week community-based, culturally-responsive, gender-specific health prevention program delivered by                                                                                                                                        |

1  
2  
3  
4  
5  
6  
7  
8  
9  
10  
11  
12  
13  
14  
15  
16  
17  
18  
19  
20  
21  
22  
23  
24  
25  
26  
27  
28  
29  
30  
31  
32  
33  
34  
35  
36  
37  
38  
39  
40  
41  
42  
43  
44  
45  
46  
47

---

|  |  |                        |                        |  |                                          |
|--|--|------------------------|------------------------|--|------------------------------------------|
|  |  | intervention model to  | diabetes and/or in     |  | <i>community health workers, trusted</i> |
|  |  | reduce incidence of    | poor health related to |  | community members provided links         |
|  |  | diabetes and obesity,  | obesity and/or other   |  | between health system and                |
|  |  | improve regular access | health concerns;       |  | community.                               |
|  |  | to care, and build     | recruited at           |  |                                          |
|  |  | community networks     | community event        |  |                                          |
|  |  |                        | (n=42)                 |  |                                          |

---

|                    |                        |                       |                        |                 |                                             |
|--------------------|------------------------|-----------------------|------------------------|-----------------|---------------------------------------------|
| Wang <sup>37</sup> | Community health       | Evaluation of patient | Patients with diabetes | Patient visited | <i>Patient navigator</i> trained in chronic |
|                    | centre providing       | navigation program to | and/or hypertension    | primary care    | illness education, motivational             |
|                    | comprehensive services | optimize health care  | not seen by provider   | provider and/or | interviewing, appointment                   |
|                    | to ethnically diverse  | utilization           | in last 6 months       | chronic disease | scheduling. Telephoned patients,            |
|                    | population with low    |                       | (n=215)                | nurse within 6  | built rapport, educated patients,           |
|                    | incomes or uninsured   |                       |                        | months          | made appointment with provider,             |
|                    |                        |                       |                        |                 | assessed need for specialist referrals,     |
|                    |                        |                       |                        |                 | identified barriers to access, assisted     |
|                    |                        |                       |                        |                 | to overcome barriers.                       |

---

|                                                                                                                               |                                                                                   |                                                                                                             |                                                                                                                                                            |                                                                                                                                                                                         |                                                                                                   |                                                                                                                                                                                                                                                                                                    |
|-------------------------------------------------------------------------------------------------------------------------------|-----------------------------------------------------------------------------------|-------------------------------------------------------------------------------------------------------------|------------------------------------------------------------------------------------------------------------------------------------------------------------|-----------------------------------------------------------------------------------------------------------------------------------------------------------------------------------------|---------------------------------------------------------------------------------------------------|----------------------------------------------------------------------------------------------------------------------------------------------------------------------------------------------------------------------------------------------------------------------------------------------------|
| 1<br>2<br>3<br>4<br>5<br>6<br>7<br>8<br>9<br>10<br>11<br>12<br>13<br>14<br>15<br>16<br>17<br>18<br>19<br>20<br>21<br>22<br>23 | Wexler <sup>54</sup>                                                              | Emergency department<br>within urban academic<br>medical centre and<br>affiliated primary care<br>practices | Randomized controlled<br>trial comparing health<br>information technology<br>intervention to<br>improve access to<br>primary care, with<br>usual care      | Medicaid enrollees<br>who did not have<br>usual source of care,<br>emergency physician<br>confirmed visit non-<br>urgent, completed<br>baseline survey,<br>randomly assigned<br>(n=148) | Patients attend<br>primary care<br>provider office<br>after discharge at<br>3, 6 and 12<br>months | <i>Emergency department electronic<br/>medical record</i> to make appointment<br>at clinic based on patient location<br>and preference. Patient given<br>appointment reminder card and<br>directions to clinic. Electronic<br>message to clinic with information<br>about patient and appointment. |
| 24<br>25<br>26<br>27<br>28<br>29<br>30<br>31<br>32<br>33<br>34<br>35<br>36<br>37<br>38                                        | ED navigators<br>connect<br>patients to<br>better venues<br>of care <sup>55</sup> | Emergency departments<br>of 8-hospital system                                                               | News article on use of<br>emergency department<br>navigators to re-direct<br>patients with non-<br>emergency issues to<br>most appropriate care<br>setting | Health plan members<br>with non-urgent<br>problems (no sample<br>reported)                                                                                                              | Patient scheduled<br>to be seen by<br>another provider                                            | <i>Navigator</i> with customer service<br>background assigned members to<br>provider and made appointments.                                                                                                                                                                                        |

1  
2  
3  
4  
5  
6  
7  
8  
9  
10  
11  
12  
13  
14  
15  
16  
17  
18  
19  
20  
21  
22  
23  
24  
25  
26  
27  
28  
29  
30  
31  
32  
33  
34  
35  
36  
37  
38  
39  
40  
41  
42  
43  
44  
45  
46  
47

|                                                                                   |                               |                                                                                                                                              |                                                                                                                                                                                                                     |                                                                                                                                          |                                                                                                                                                                                                                                  |
|-----------------------------------------------------------------------------------|-------------------------------|----------------------------------------------------------------------------------------------------------------------------------------------|---------------------------------------------------------------------------------------------------------------------------------------------------------------------------------------------------------------------|------------------------------------------------------------------------------------------------------------------------------------------|----------------------------------------------------------------------------------------------------------------------------------------------------------------------------------------------------------------------------------|
| Navigator<br>reduces<br>readmissions,<br>inappropriate<br>ED visits <sup>56</sup> | Urban emergency<br>department | News article on<br>community health<br>outreach worker<br>helping patients find a<br>primary care provider                                   | Patients with non-<br>urgent problems who<br>are uninsured and<br>don't have a primary<br>care provider, insured<br>but don't have a<br>provider, or have a<br>provider but can't<br>access him or her<br>(n=1,500) | Self-pay patients<br>find medical<br>home; other<br>patients identify<br>primary care<br>provider and set<br>up follow-up<br>appointment | <i>Community health outreach<br/>coordinator/navigator</i> of varying<br>cultures representing patients<br>served. Met patient in emergency<br>department, coordinated<br>appointments, and set patients up in<br>medical homes. |
| ED navigators<br>help patients<br>find a PCP <sup>57</sup>                        | Urban emergency<br>department | News article on a pilot<br>project to reduce 30-<br>day readmissions and<br>number of self-pay<br>patients who visit<br>emergency department | Patients without<br>insurance and primary<br>care provider<br>admitted to hospital<br>through emergency<br>department and or                                                                                        | Patients directed<br>to primary care<br>provider and set<br>up in medical<br>home                                                        | <i>Navigator</i> worked with patients to<br>discuss discharge and help facilitate<br>follow-up appointments.                                                                                                                     |



---

for non-emergent care    not admitted (no  
sample reported)

---

For peer review only

### Patient navigators: Definition and descriptions

One study defined patient navigation as a “process, by which an individual, a Patient Navigator, guides patients in overcoming barriers to health care services access to facilitate timely access to care”<sup>37</sup>. The studies provided either a description of a navigator (person) or, for three of the studies, navigation process<sup>43 45 54</sup>. Descriptions varied in detail and often consisted of the type of person recruited as a navigator, the tasks they performed, and the training provided (Table 2).

### Patient navigation program components

All of the studies outlined components of their programs; four provided detailed descriptions<sup>39-41 49</sup>.

We grouped program components according to Freeman’s consensus-based nine-principle framework of patient navigation, originally developed in response to the expansion of patient navigation as a community-based intervention<sup>16 58 59</sup>. These principles have been widely used in patient navigation programs. Each of these principles is outlined below with examples from the studies selected that included sufficient information to inform each principle in the framework.

#### *Principle 1: Patient-centred health care service delivery model*

Seventeen of the studies outlined aspects of patient-centred care. This will be discussed further in the section addressing research question three.

#### *Principle 2: Integration of a fragmented healthcare system*

This principle relates to a patient experiencing a seamless, timely flow through the continuum of care<sup>16</sup>. We grouped another principle (*Principle 8: Connect disconnected health care systems*) here with Principle 2, as the two are similar concepts and this has been done previously<sup>60</sup>. All studies in our scoping review reported on these principles grouped together. Two examples of integration in our scoping review were assisting patients to understand the entire health system<sup>42</sup>, and linking the emergency department with a primary care provider, as well as to community dental, mental health, substance abuse and other social services<sup>51</sup>.

### *Principle 3: Elimination of barriers*

This principle is most effectively carried out through relationships with patients<sup>16</sup>. While removing barriers to accessing primary care appears implicit in a navigator program, not all studies provided detail of what the barriers were and how they were addressed. One exception of note is the *Step on It!* intervention at JFK International Airport, which focused on the barriers taxi drivers faced. This intervention went to the airport holding lot, assisted drivers to locate providers with flexible hours, culturally and linguistically appropriate models of care, and at low-cost<sup>46</sup>. Another study described a program that helped adults with sickle cell disease find primary care<sup>52</sup>. The barriers addressed included patients not understanding why they needed a primary care provider when they already had a specialist, low literacy, difficulty filling out forms and forgetting appointments. These navigators used motivational interviewing to identify further barriers and help patients set priorities beyond accessing primary care<sup>52</sup>.

### *Principle 4: Clear scope of practice*

Three studies provided detail about the role and responsibilities of the navigator<sup>37 49 52</sup>. The most detailed of these was a randomized clinical trial by Kangovi et al.<sup>49</sup>, providing a website link (<http://chw.upenn.edu>) containing protocols for recruitment, training and standardized work practices for navigators, organisational directors and managers.

Kangovi et al.<sup>49</sup> created a community health worker model and tested its effect on post-hospital outcomes among general medical inpatients. This was based on qualitative participatory action research and had detailed protocols including standardized work practices in three stages: goal setting, goal support, and connection with primary care. A substantial component was to build relationships with patients to help set goals for recovery, develop an individualized action plan, and liaise between the patient and inpatient care team. The worker provided tailored support based on the patient goals. Patients were connected to primary care and coached to make and attend

1  
2  
3 appointments independently. Provider resources included a discharge summary and the patient's  
4  
5 action plan taken to the appointment.  
6

7  
8 *Principle 5: Cost-effective*  
9

10 None of the studies evaluated the cost-effectiveness of their program.  
11

12  
13 *Principle 6: Defined level of skill*  
14

15 Nine studies provided information on the skill level required of the navigators<sup>39 42 49-53 55</sup>. This ranged  
16  
17 from volunteers with in-house training, staff with customer service backgrounds, to college-  
18  
19 accredited navigators. They were trained on topics such as navigation processes, disease-specific  
20  
21 content such as diabetes education, or motivational interviewing. Similarly, seven studies presented  
22  
23 strategies intentionally used to inform the development of resources to support the navigation  
24  
25 intervention, including a needs assessment<sup>42 56</sup>, software development<sup>43</sup>, community-based  
26  
27 participatory action research<sup>46 49 53</sup> and provider collaboration to develop and test navigation  
28  
29 mechanisms<sup>51</sup>.  
30

31  
32 *Principle 7: Defined beginning and end*  
33

34 Eleven studies outlined definite points at which navigation began and ended<sup>37 43-47 49 51 54 56 57</sup>. Entry  
35  
36 usually involved meeting a patient (in the emergency department or on a hospital ward, for example)  
37  
38 to schedule an appointment. End points of the interventions included "patient has an appointment  
39  
40 made" or "patient sees provider".  
41  
42

43  
44 *Principle 8: Connect disconnected healthcare systems*  
45

46 This principle was combined with a similar principle, (*Principle 2 Integration of a fragmented*  
47  
48 *healthcare system*) for the purposes of this review.  
49  
50  
51  
52  
53  
54  
55  
56  
57  
58  
59  
60

1  
2  
3 *Principle 9: Coordinated system*

4 This principle relates to having an assigned coordinator to oversee all aspects of the intervention<sup>16</sup>.

5  
6 This was evident in two studies: where navigators served as executive officers on a governing  
7  
8 board<sup>42</sup> and were supervised by a social worker as well as having weekly team meetings<sup>49</sup>.

9  
10  
11  
12 **Patient navigation: patient-centredness**

13  
14 Our third question for this review was, 'To what extent has patient-centredness been incorporated  
15  
16 into the design, implementation and analysis of patient navigation programs?' We focused on the  
17  
18 three factors upon which patient-centred care depends: informed and involved patient, receptive  
19  
20 and responsive health professionals, and a coordinated, supportive health care environment<sup>11</sup>.

21  
22 Seventeen studies included at least one of the three factors. Table 3 indicates the number of studies  
23  
24 and some examples of approaches to patient-centred care for each of the three factors. The  
25  
26 columns of the table indicate whether patient-centredness was included in the design,  
27  
28 implementation, or analysis phase of patient navigation programs.

Table 3 Examples of patient-centredness

| Patient-centred care factor                     | Design phase examples                                                                                                                           | Implementation phase examples                                                                                                                             | Analysis phase examples                                                                                                   | Total studies* |
|-------------------------------------------------|-------------------------------------------------------------------------------------------------------------------------------------------------|-----------------------------------------------------------------------------------------------------------------------------------------------------------|---------------------------------------------------------------------------------------------------------------------------|----------------|
| Patients informed and involved in their care    | 2 studies: user-friendly and culturally-sensitive health materials; bilingual, bicultural community members                                     | 17 studies: provided information to patient on difference between emergency and primary care; identified barriers to access and help to overcome barriers | 0 studies                                                                                                                 | 19             |
| Receptive and responsive health professionals   | 3 studies: clinics added capacity for walk-in appointments, navigator visited clinics to provide information and establish working relationship | 6 studies: after connection, navigator worked with provider to schedule other visits as per care plan; assisted with patient education and follow-up      | 2 studies: providers wanted to continue in program; information to providers more complete and accessible than previously | 11             |
| Coordinated, supportive health care environment | 4 studies: Collaborative organisation linked emergency department with 18 clinics; each hospital adopted unique                                 | 1 study: emergency physicians encouraged to establish relationships with clinics                                                                          | 1 study: community mobilized around population health issues through increased local media attention                      | 6              |

|  |                                      |  |  |  |
|--|--------------------------------------|--|--|--|
|  | provider arrangement<br>and approach |  |  |  |
|--|--------------------------------------|--|--|--|

\*Some studies included more than one instance of the patient-centred factor in more than one phase of the intervention

The Kangovi et al.<sup>49</sup> study had an explicit patient-centred focus. The intervention prioritised relationship building with patients through goal setting and development of action plans, liaising with inpatient staff to ensure the patient's goals were at the forefront, and giving the action plan to a provider the patient chose based on needs and preferences.

Similarly, in the three studies reporting the same randomized controlled trial, Griswold et al.<sup>39-41</sup> used a care navigator to connect patients with a history of psychiatric crisis to primary care. The navigator built relationships by meeting with patients routinely while admitted and also at primary care appointments, and maintaining regular contact via phone or in person. The navigator would take the patient to the appointment and reinforce any education provided. Patients were informed of low-cost clinics and further assistance was provided through coordinating follow-up and connecting patients to peer and social services. Provider resources included information to clinics on discharge diagnosis, medications and mental health treatment site referral.

Other studies included the three factors yet did not explicitly state patient-centredness as a driver.

## DISCUSSION

Our scoping review identified 20 studies that used patient navigation to facilitate access, and connect vulnerable patients without regular primary care, to a primary care provider. All except three studies used a *person* to connect the patient to a provider; the remaining three used a navigation *process*. Most programs described components that could be included in a framework of patient navigation, and 17 of the 20 studies included factors inherent to patient-centred care in their design, implementation or analysis.

1  
2  
3 The level of detail in descriptions of the studies varied; this variation has been reported elsewhere<sup>61</sup>.  
4  
5 In the studies included in this review, different terms were used for the same role: patient or care  
6  
7 navigator, advocate, case manager, or community health worker, for example. This presents  
8  
9 challenges in clearly characterizing navigators and understanding what they do. Similarly, while  
10  
11 there is no generally accepted definition of patient navigation, there is a call for descriptions of the  
12  
13 tasks navigators do and the networks of contacts they use to support their actions<sup>61</sup>. Valaitis et al.<sup>28</sup>  
14  
15 described the specific activities undertaken by patient navigators: facilitating access to health-  
16  
17 related programs, promoting and facilitating continuity of care, identifying and removing barriers to  
18  
19 care, and effective and efficient use of the health system. Our findings add to these activities: a key  
20  
21 feature of patient navigation to facilitate access to primary care is a relationship-based approach,  
22  
23 informing and involving patients in connecting them to care.  
24  
25

26  
27 The studies in this scoping review included elements that seemed to match the components of  
28  
29 Freeman's patient navigation framework. This indicates the framework may be generalizable to the  
30  
31 tasks of connecting vulnerable people without a primary care provider to regular care. An evaluation  
32  
33 of these principles used in 10 self-identified breast cancer navigation programs using observation of  
34  
35 patient navigator activities found the programs were consistent with individual-level principles (for  
36  
37 example eliminating barriers, patient-centred care, integration of care), however program-level  
38  
39 principles (for example skill level, scope of practice, coordinated system) were not consistent across  
40  
41 the programs. We did not examine this level of detail for our scoping review, however, can see a role  
42  
43 for this type of observation-based study to further contribute to this field.<sup>62</sup> Generally, programs  
44  
45 adhered to published criteria for patient-centred care<sup>11</sup>. Although not overtly stated as an aim,  
46  
47 almost all studies incorporated at least one of the three patient-centred care factors: an informed  
48  
49 and involved patient, receptive and responsive health professionals, and a coordinated, supportive  
50  
51 health care environment. We found these mostly in the implementation of the programs, to a lesser  
52  
53 degree in the design phase and mentioned in only three studies in the analysis. Our assertion that a  
54  
55  
56  
57  
58  
59  
60



1  
2  
3 navigator working with patients unattached to primary care is patient-centred, with a focus on  
4 connections and relationships, has some merit.  
5

6  
7  
8 This scoping review has several limitations. Although a scoping review is iterative and involves  
9 revisiting the research question and key terms during searches, our search strategy may have missed  
10 studies that reported on interventions not designed to connect people to primary care, but where  
11 this connection may have been a secondary outcome of the intervention (for example, access to  
12 information on cancer screening may have prompted participants to link in with a primary care  
13 provider). Additionally, information in the title and abstracts of such studies may not have referred  
14 to primary care. This approach, however, allowed us to undertake a more targeted review. Similarly,  
15 while our search strategy sought to include all terms we determined could be synonymous with  
16 patient navigation, we may have missed studies where different names were used for the same  
17 function.  
18  
19  
20  
21  
22  
23  
24  
25  
26  
27

28  
29  
30 Studies where there was no indication patients attended a primary care appointment were not  
31 included in our review. While this strategy contributed to a more focused search, studies that  
32 reported the implementation of programs but not outcomes are missing. All of our included studies  
33 originated in the United States, which we acknowledge would impact on generalizability. These  
34 limitations highlight the need for consistent documentation of processes to improve access to care  
35 and the outcomes measured.  
36  
37  
38  
39  
40  
41  
42

43 We did not look for or report on the effectiveness of the interventions or programs in our included  
44 studies. While we are unable to report on the impact, we consider our approach to looking at  
45 descriptions and uses of patient navigation in this specific context of connection to primary care,  
46 with a focus on patient-centred care, is consistent with the current focus on patient-reported  
47 outcome measures and acknowledging the patient experience of care.  
48  
49  
50  
51  
52  
53  
54  
55  
56  
57  
58  
59  
60

1  
2  
3 This paper contributes to the discussion of access to primary care by considering patient navigation  
4 to connect vulnerable populations to providers in three ways. Firstly, we aligned components of the  
5 patient navigation studies reviewed to an existing generic navigation framework. This framework  
6 appears to be appropriate for considering navigators facilitating access for people without a primary  
7 care provider to regular care. Secondly, a relational approach acts as the backdrop to connecting  
8 vulnerable people to care, based on principles of patient-centred care. Finally, in the absence of a  
9 consistent definition of patient navigation in facilitating access to primary care, we have added to an  
10 existing description of patient navigation activities, which will assist clinicians and researchers to  
11 design and implement similar programs.  
12  
13  
14  
15  
16  
17  
18  
19  
20  
21

### 22 **Implications for practice**

23  
24 The studies included in the review used navigators in a range of settings, from emergency  
25 departments, inpatient wards, outpatient services, and in the community. Most of these studies  
26 demonstrate established principles of patient navigation, and use a patient-centred approach,  
27 particularly when using a navigator (person) rather than a process, such as an electronic system. For  
28 providers and organisations wanting to link vulnerable people to primary care in a patient-centred  
29 way, navigators may assist in this process.  
30  
31  
32  
33  
34  
35  
36  
37

### 38 **Future research**

39  
40 Analysis of cost effectiveness, while not a focus of this review, was nevertheless absent in the cited  
41 studies. As the concept of navigator continues to show promise, further research is required to  
42 measure impact and give direction to settings interested in using this intervention. For example, the  
43 link between patient navigation principles and outcomes of interest require further exploration.  
44  
45  
46  
47  
48  
49

### 50 **CONCLUSION**

51  
52 Patient navigators may be used across health care settings to improve access to primary care.  
53  
54 Navigators are inherently patient-centred due to their relational approach and ability to connect  
55  
56  
57  
58  
59  
60

1  
2  
3 people to primary care. Interventions to improve access to primary care require further study to  
4  
5 determine their impact and cost-effectiveness.  
6  
7  
8  
9  
10  
11  
12  
13  
14  
15  
16  
17  
18  
19  
20  
21  
22  
23  
24  
25  
26  
27  
28  
29  
30  
31  
32  
33  
34  
35  
36  
37  
38  
39  
40  
41  
42  
43  
44  
45  
46  
47  
48  
49  
50  
51  
52  
53  
54  
55  
56  
57  
58  
59  
60

For peer review only

## Acknowledgements

We wish to acknowledge the peer reviewers of the original version of this paper, who provided valued and insightful suggestions to improve the structure, flow, and clarity of this paper.

## Funding

This work was supported by The Professor Leon Piterman AM PhD Scholarship, Southern Academic Primary Care Research Group, Monash University.

## Competing interests

None declared.

## Contributors

AP involved in writing protocol, searches, screening, extraction, drafting of results and writing of manuscripts. VL and TB involved in content expert input (methodology) and editing manuscripts. GR oversaw the project, assisted with screening, content expert input, drafting of results and editing of manuscripts.

## Data sharing statement

Further details on studies included in this scoping review can be retrieved by contacting the corresponding author at [annette.peart@monash.edu](mailto:annette.peart@monash.edu).

## Figures

Figure 1: Flow of study selection.

## References

1. Schamess A, Foraker R, Kretovics M, et al. Reduced emergency room and hospital utilization in persons with multiple chronic conditions and disability receiving home-based primary care. *Disability and health journal* 2016;**10**(2):326-33.

2. Loignon C, Hudon C, Goulet É, et al. Perceived barriers to healthcare for persons living in poverty in Quebec, Canada: the EQUIhealthY project. *International Journal for Equity in Health* 2015;**14**(1):4.
3. Ford JA, Wong G, Jones AP, et al. Access to primary care for socioeconomically disadvantaged older people in rural areas: a realist review. *BMJ open* 2016;**6**(5):e010652.
4. Davy C, Harfield S, McArthur A, et al. Access to primary health care services for Indigenous peoples: A framework synthesis. *International Journal for Equity in Health* 2016;**15**(1):163.
5. Levesque J-F, Harris MF, Russell G. Patient-centred access to health care: conceptualising access at the interface of health systems and populations. *Int J Equity Health* 2013;**12**:1-9.
6. McColl MA, Aiken A, Schaub M. Do people with disabilities have difficulty finding a family physician? *Int J Environ Res Public Health* 2015;**12**(5):4638-51.
7. Shi L, Lebrun-Harris LA, Daly CA, et al. Reducing disparities in access to primary care and patient satisfaction with care: The role of health centers. *J Health Care Poor Underserved* 2013;**24**(1):56-66.
8. Starfield B. *Primary care: balancing health needs, services, and technology*. New York: Oxford University Press, 1998.
9. Starfield B. Primary care: an increasingly important contributor to effectiveness, equity, and efficiency of health services. *SESPAS report 2012*. *Gac Sanit* 2012;**26**:20-26.
10. Janamian T, Jackson CL, Glasson N, et al. A systematic review of the challenges to implementation of the patient-centred medical home: lessons for Australia. *Med J Aust* 2014;**201**(3 Suppl):S69-73.
11. Epstein RM, Fiscella K, Lesser CS, et al. Why the nation needs a policy push on patient-centered health care. *Health Aff* 2010;**29**(8):1489-95.
12. Kelly E, Ivers N, Zawi R, et al. Patient navigators for people with chronic disease: protocol for a systematic review and meta-analysis. *Syst Rev* 2015;**4**(1):28.
13. Natale-Pereira A, Enard KR, Nevarez L, et al. The role of patient navigators in eliminating health disparities. *Cancer* 2011;**117**(S15):3541-50.
14. Jean-Pierre P, Hendren S, Fiscella K, et al. Understanding the processes of patient navigation to reduce disparities in cancer care: perspectives of trained navigators from the field. *J Cancer Educ* 2011;**26**(1):111-20.
15. Dennis S, Hasan I, Jackson Pulver L, et al. Experiences and views of a brokerage model for primary care for Aboriginal people. *Aust Health Rev* 2015;**39**(1):26-32.
16. Freeman HP. The origin, evolution, and principles of patient navigation. *Cancer Epidemiol Biomarkers Prev* 2012;**21**(10):1614-17.
17. Manderson B, McMurray J, Piraino E, et al. Navigation roles support chronically ill older adults through healthcare transitions: a systematic review of the literature. *Health Soc Care Community* 2012;**20**(2):113-27.
18. Glick SB, Clarke AR, Blanchard A, et al. Cervical cancer screening, diagnosis and treatment interventions for racial and ethnic minorities: a systematic review. *J Gen Intern Med* 2012;**27**(8):1016-32.
19. Tho PC, Ang E. The effectiveness of patient navigation programs for adult cancer patients undergoing treatment: a systematic review. *JBIR Database System Rev Implement Rep* 2016;**14**(2):295-321.
20. Tan CHH, Wilson S, McConigley R. Experiences of cancer patients in a patient navigation program: a qualitative systematic review. *JBIR Database System Rev Implement Rep* 2015;**13**(2):136-68.
21. Robinson-White S, Conroy B, Slavish KH, et al. Patient navigation in breast cancer: a systematic review. *Cancer Nurs* 2010;**33**(2):127-40.
22. Naylor K, Ward J, Polite BN. Interventions to improve care related to colorectal cancer among racial and ethnic minorities: a systematic review. *J Gen Intern Med* 2012;**27**(8):1033-46.

23. Genoff MC, Zaballa A, Gany F, et al. Navigating language barriers: a systematic review of patient navigators' impact on cancer screening for limited English proficient patients. *J Gen Intern Med* 2016;**31**(4):426-34.
24. Eschiti V, Burhansstipanov L, Watanabe-Galloway S. Native cancer navigation: the state of the science. *Clin J Oncol Nurs*, 2012:73-82.
25. Ranaghan C, Boyle K, Meehan M, et al. Effectiveness of a patient navigator on patient satisfaction in adult patients in an ambulatory care setting: a systematic review. *JBI Database System Rev Implement Rep* 2016;**14**(8):172-218.
26. Meredith SM. Disparities in breast cancer and the role of patient navigator programs. *Clin J Oncol Nurs*, 2013:54-59.
27. Krok-Schoen JL, Oliveri JM, Paskett ED. Cancer care delivery and women's health: the role of patient navigation. *Front Oncol* 2016;**6**(2).
28. Valaitis RK, Carter N, Lam A, et al. Implementation and maintenance of patient navigation programs linking primary care with community-based health and social services: a scoping literature review. *BMC Health Serv Res* 2017;**17**(1):116.
29. Institute of Medicine. *Crossing the quality chasm: a new health system for the 21st century*. Washington, DC.: National Academies Press, 2001.
30. Epstein RM, Street RL. The values and value of patient-centered care. *Ann Fam Med* 2011;**9**(2):100-03.
31. Sidani S, Fox M. Patient-centered care: clarification of its specific elements to facilitate interprofessional care. *J Interprof Care* 2014;**28**(2):134-41.
32. Constand MK, MacDermid JC, Dal Bello-Haas V, et al. Scoping review of patient-centered care approaches in healthcare. *BMC Health Serv Res* 2014;**14**(1):1-9.
33. Cadzow RB, Craig M, Rowe J, et al. Transforming community members into diabetes cultural health brokers: the Neighborhood Health Talker project. *Diabetes Educ* 2013;**39**(1):100-08.
34. Torres S, Spitzer DL, Labonté R, et al. Community health workers in Canada: innovative approaches to health promotion outreach and community development among immigrant and refugee populations. *J Ambul Care Manage* 2013;**36**(4):305-18.
35. Arksey H, O'Malley L. Scoping studies: towards a methodological framework. *Int J Social Res Methodol* 2005;**8**(1):19-32.
36. Levac D, Colquhoun H, O'Brien KK. Scoping studies: advancing the methodology. *Implement Sci* 2010;**5**(1):1-9.
37. Wang ML, Gallivan L, Lemon SC, et al. Navigating to health: evaluation of a community health center patient navigation program. *Prev Med Rep* 2015;**2**:664-68.
38. Parker VA, Lemak CH. Navigating patient navigation: crossing health services research and clinical boundaries. *Bienn Rev Health Care Manage* 2011:149-83.
39. Griswold KS, Homish GG, Pastore PA, et al. A randomized trial: are care navigators effective in connecting patients to primary care after psychiatric crisis? *Community Ment Health J* 2010;**46**(4):398-402.
40. Griswold KS, Servoss TJ, Leonard KE, et al. Connections to primary medical care after psychiatric crisis. *J Am Board Fam Pract* 2005;**18**(3):166-72.
41. Griswold KS, Zayas LE, Pastore PA, et al. Primary care after psychiatric crisis: a qualitative analysis. *Ann Fam Med* 2008;**6**(1):38-43.
42. Bishop S, Edwards, JM, Nadkarni, M. Charlottesville Health Access: a locality-based model of health care navigation for the homeless. *J Health Care Poor Underserved* 2009;**20**(4):958-63.
43. Chan TC, Killeen JP, Castillo EM, et al. Impact of an internet-based emergency department appointment system to access primary care at safety net community clinics. *Ann Emerg Med* 2009;**54**(2):279-84.
44. Doran KM, Colucci AC, Hessler RA, et al. An intervention connecting low-acuity emergency department patients with primary care: effect on future primary care linkage. *Ann Emerg Med* 2013;**61**(3):312-21.e7.

- 1
- 2
- 3 45. Elliott K, W. Klein J, Basu A, et al. Transitional care clinics for follow-up and primary care linkage
- 4 for patients discharged from the ED. *Am J Emerg Med* 2016;**34**(7):1230-35.
- 5 46. Gany F, Bari S, Gill P, et al. Step On It! Impact of a workplace New York City taxi driver health
- 6 intervention to increase necessary health care access. *Am J Public Health* 2015;**105**(4):786-
- 7 92.
- 8 47. Horwitz SM, Busch SH, Balestracci KMB, et al. Intensive intervention improves primary care
- 9 follow-up for uninsured emergency department patients. *Acad Emerg Med* 2005;**12**(7):647-
- 10 52.
- 11 48. Kahn LS, Aiello J, Berdine DE, et al. The use of telephonic case management to link a special-
- 12 needs population with a primary care physician. *J Am Board Fam Med* 2009;**22**(5):585-87.
- 13 49. Kangovi S, Mitra N, Grande D, et al. Patient-centered community health worker intervention to
- 14 improve posthospital outcomes: a randomized clinical trial. *JAMA Intern Med*
- 15 2014;**174**(4):535-43.
- 16 50. Kim TY, Mortensen K, Eldridge B. Linking uninsured patients treated in the emergency
- 17 department to primary care shows some promise in Maryland. *Health Aff* 2015;**34**(5):796-
- 18 804.
- 19 51. Marr AL, Pillow T, Brown S. Southside Medical Homes Network: linking emergency department
- 20 patients to community care. *Prehosp Disaster Med* 2008;**23**(3):282-84.
- 21 52. Overholser LS, Hassell K, Nuss R, et al. Using patient navigators to help adults with sickle cell
- 22 disease obtain a primary care home. *J Clin Outcomes Manage* 2014;**21**(7):304-07.
- 23 53. Treadwell H, Holden K, Hubbard R, et al. Addressing obesity and diabetes among African
- 24 American men: examination of a community-based model of prevention. *J Natl Med Assoc*
- 25 2010;**102**(9):794-802.
- 26 54. Wexler R, Hefner, JL, Sieck, C, Taylor, CA, Lehman, J, Panchal, AR, Aldrich, A, McAlearney, AS.
- 27 Connecting emergency department patients to primary care. *J Am Board Fam Med*
- 28 2015;**28**(6):722-32.
- 29 55. ED navigators connect patients to better venues of care. *ED Manage* 2011;**May**:53-55.
- 30 56. Aantjes C, Quinlan T, Bunders J. Integration of community home based care programmes within
- 31 national primary health care revitalisation strategies in Ethiopia, Malawi, South-Africa and
- 32 Zambia: a comparative assessment. *Globalization & Health* 2014;**10**(1):85-85 1p.
- 33 57. ED navigators help patients find a PCP. *Hosp Case Manage* 2014;**22**(1):9-10.
- 34 58. Freeman HP. The history, principles, and future of patient navigation: commentary. *Semin Oncol*
- 35 *Nurs* 2013;**29**(2):72-75.
- 36 59. Freeman HP, Rodriguez RL. History and principles of patient navigation. *Cancer*
- 37 2011;**117**(S15):3537-40.
- 38 60. Gunn CM, Clark JA, Battaglia TA, et al. An assessment of patient navigator activities in breast
- 39 cancer patient navigation programs using a nine-principle framework. *Health Serv Res*,
- 40 2014:1555-77.
- 41 61. Parker VA, Clark JA, Leyson J, et al. Patient navigation: development of a protocol for describing
- 42 what navigators do. *Health Serv Res*, 2010:514+.
- 43 62. Gunn CM, Clark JA, Battaglia TA, et al. An assessment of patient navigator activities in breast
- 44 cancer patient navigation programs using a nine-principle framework. *Health Serv Res*,
- 45 2014:1555+.
- 46
- 47
- 48
- 49
- 50
- 51
- 52
- 53
- 54
- 55
- 56
- 57
- 58
- 59
- 60

1  
2  
3  
4  
5  
6  
7  
8  
9  
10  
11  
12  
13  
14  
15  
16  
17  
18  
19  
20  
21  
22  
23  
24  
25  
26  
27  
28  
29  
30  
31  
32  
33  
34  
35  
36  
37  
38  
39  
40  
41  
42  
43  
44  
45  
46  
47  
48  
49  
50  
51  
52  
53  
54  
55  
56  
57  
58  
59  
60

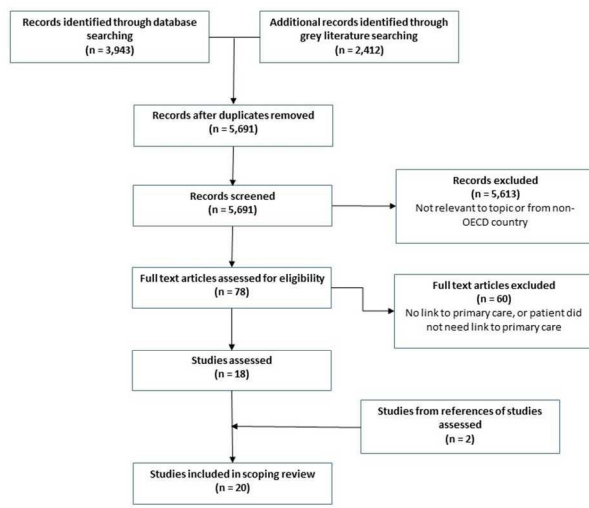

Figure 1. Flow of study selection.

108x60mm (300 x 300 DPI)



1  
2  
3  
4  
5  
6  
7  
8  
9  
10  
11  
12  
13  
14  
15  
16  
17  
18  
19  
20  
21  
22  
23  
24  
25  
26  
27  
28  
29  
30  
31  
32  
33  
34  
35  
36  
37  
38  
39  
40  
41  
42  
43  
44  
45  
46  
47  
48  
49  
50  
51  
52  
53  
54  
55  
56  
57  
58  
59  
60

## Supplementary File 1

### Databases searched

MEDLINE/PubMed

Embase

CINAHL

AMED

PsycINFO

Cochrane Library

Scopus

Web of Science Core Collection

ProQuest Dissertations & Theses

CIRRIE

PLoS

ProQuest Central

### Grey literature sources

Agency for Healthcare Research and Quality National Guideline Clearinghouse

<http://www.guideline.gov>

Australian Commission on Safety and Quality in Health Care <http://www.safetyandquality.gov.au>

Australian Government Department of Health <http://www.health.gov.au>

Australian Institute of Health and Welfare <http://www.aihw.gov.au>

British Library E-theses Online Service <http://ethos.bl.uk/Home.do>

Canadian Institute for Health Information <https://www.cihi.ca/en>

Canadian Institutes of Health Research <http://www.cihr-irsc.gc.ca/e/193.html>

Centers for Disease Control and Prevention Wonder database <http://wonder.cdc.gov/welcome.html>

1  
2  
3 Commonwealth Fund <http://www.commonwealthfund.org/>  
4

5  
6 European Observatory on Health Systems and Policies [http://www.euro.who.int/en/about-](http://www.euro.who.int/en/about-us/partners/observatory)  
7  
8 [us/partners/observatory](http://www.euro.who.int/en/about-us/partners/observatory)  
9

10  
11 Health Improvement and Innovation Resource Center <http://www.hiirc.org.nz>  
12

13  
14 Health Issues Center <http://www.healthissuescenter.org.au>  
15

16  
17 Health Systems Evidence <http://www.healthsystemsevidence.org/>  
18

19  
20 Institute for Clinical Evaluative Sciences <http://www.ices.on.ca/>  
21

22  
23 Institute for Healthcare Improvement <http://www.ihl.org/Pages/default.aspx>  
24

25  
26 Kings Fund <http://www.kingsfund.org.uk/>  
27

28  
29 MacColl Center for Health Care Innovation <http://maccollcenter.org/>  
30

31  
32 National Collaborating Centers for Public Health <http://www.nccph.ca/2/home.ccnsp>  
33

34  
35 National Institute for Health and Care Excellence <https://www.nice.org.uk/>  
36

37  
38 National Institute for Health and Care Excellence Evidence Search <http://www.evidence.nhs.uk>  
39

40  
41 National Library of Australia Trove <http://trove.nla.gov.au>  
42

43  
44 National Quality Forum <http://www.qualityforum.org/Home.aspx>  
45

46  
47 Networked Digital Library of Theses and Dissertations <http://ndltd.org>  
48

49  
50 New Zealand Ministry of Health <http://www.health.govt.nz>  
51

52  
53 New Zealand Social Policy Evaluation and Research Unit <http://www.superu.govt.nz>  
54

55  
56 NHS Sustainable Improvement Team (formerly Improving Quality) <http://www.nhsiq.nhs.uk/>  
57  
58  
59  
60

1  
2  
3 Nuffield Trust <http://www.nuffieldtrust.org.uk/>  
4

5  
6 Open Grey <http://opengrey.eu>  
7

8  
9 Primary Health Care Research and Information Service <http://www.phcris.org.au/researchevidence/>  
10

11  
12 Public Health Agency of Canada <http://www.phac-aspc.gc.ca/index-eng.php>  
13

14  
15 Robert Wood Johnson Foundation <http://www.rwjf.org/>  
16

17  
18 The Change Foundation <http://www.changefoundation.com/>  
19

20  
21 The Health Foundation <http://www.health.org.uk>  
22

23  
24 The Henry J. Kaiser Family Foundation <http://kff.org/>  
25

26  
27 The National Academies of Sciences Engineering Medicine, Health and Medicine Division  
28  
29 <http://www.nationalacademies.org/hmd/>  
30

31  
32 The New York Academy of Medicine Grey Literature Report <http://www.greylit.org/>  
33

34  
35 Theses Canada <http://www.bac-lac.gc.ca/eng/services/theses/Pages/theses-canada.aspx>  
36

37  
38 US National Library of Medicine Health Services Research Projects in Progress  
39  
40 [http://wwwcf.nlm.nih.gov/hsr\\_project/home\\_proj.cfm](http://wwwcf.nlm.nih.gov/hsr_project/home_proj.cfm)  
41

42  
43 World Health Organization Primary Health Care  
44

45  
46 [http://www.who.int/topics/primary\\_health\\_care/en/](http://www.who.int/topics/primary_health_care/en/)  
47  
48  
49  
50  
51  
52  
53  
54  
55  
56  
57  
58  
59  
60

## Supplementary File 2: Boolean search strategy

Database name and provider: OVID Medline

Search conducted by the first author on 27 April 2016

| Search # | Search term (titles and abstracts, years searched 2000 – April 2016) | Hits  |
|----------|----------------------------------------------------------------------|-------|
| 1        | Broker*                                                              | 1010  |
| 2        | Health broker*                                                       | 7     |
| 3        | Health service* broker                                               | 0     |
| 4        | Community health worker*                                             | 2204  |
| 5        | Community navigat*                                                   | 18    |
| 6        | Peer navigat*                                                        | 27    |
| 7        | Patient navigat*                                                     | 463   |
| 8        | Lay health work*                                                     | 184   |
| 9        | Link* to care                                                        | 800   |
| 10       | Navigat*                                                             | 21928 |
| 11       | 1 or 2 or 3 or 4 or 5 or 6 or 7 or 8 or 9 or 10                      | 26012 |
| 12       | Family practi*                                                       | 8493  |
| 13       | General practi*                                                      | 33546 |
| 14       | Primary care                                                         | 79085 |
| 15       | Primary health care                                                  | 15589 |
| 16       | Community health*                                                    | 16307 |

|    |                                                                                   |        |
|----|-----------------------------------------------------------------------------------|--------|
| 17 | 12 or 13 or 14 or 15 or 16                                                        | 139643 |
| 18 | 11 and 17                                                                         | 2742   |
| 19 | Limit 18 to (abstracts and English language and humans and yr="2000 –<br>Current" | 2194   |

For peer review only
