# Supplementary material for: Patient navigators facilitating access to primary care: a scoping review
Source: PubMed Central journal article supplement — BMJ Open. 2018 Mar 17;8(3):e019252. doi: 10.1136/bmjopen-2017-019252 (PMC5875656; doi:10.1136/bmjopen-2017-019252), 2018-03-17
Supplement: bmjopen-2017-019252supp001.pdf [file bmjopen-2017-019252supp001.pdf]

## Supplementary File 1

### Databases searched

MEDLINE/PubMed

Embase

CINAHL

AMED

PsycINFO

Cochrane Library

Scopus

Web of Science Core Collection

ProQuest Dissertations & Theses

CIRRIE

PLoS

ProQuest Central

### Grey literature sources

Agency for Healthcare Research and Quality National Guideline Clearinghouse

<http://www.guideline.gov>

Australian Commission on Safety and Quality in Health Care <http://www.safetyandquality.gov.au>

Australian Government Department of Health <http://www.health.gov.au>

Australian Institute of Health and Welfare <http://www.aihw.gov.au>

British Library E-theses Online Service <http://ethos.bl.uk/Home.do>

Canadian Institute for Health Information <https://www.cihi.ca/en>

Canadian Institutes of Health Research <http://www.cihr-irsc.gc.ca/e/193.html>

Centers for Disease Control and Prevention Wonder database <http://wonder.cdc.gov/welcome.html>

Commonwealth Fund <http://www.commonwealthfund.org/>

European Observatory on Health Systems and Policies <http://www.euro.who.int/en/about-us/partners/observatory>

Health Improvement and Innovation Resource Center <http://www.hiirc.org.nz>

Health Issues Center <http://www.healthissuescenter.org.au>

Health Systems Evidence <http://www.healthsystemsevidence.org/>

Institute for Clinical Evaluative Sciences <http://www.ices.on.ca/>

Institute for Healthcare Improvement <http://www.ihl.org/Pages/default.aspx>

Kings Fund <http://www.kingsfund.org.uk/>

MacColl Center for Health Care Innovation <http://maccollcenter.org/>

National Collaborating Centers for Public Health <http://www.nccph.ca/2/home.ccnsp>

National Institute for Health and Care Excellence <https://www.nice.org.uk/>

National Institute for Health and Care Excellence Evidence Search <http://www.evidence.nhs.uk>

National Library of Australia Trove <http://trove.nla.gov.au>

National Quality Forum <http://www.qualityforum.org/Home.aspx>

Networked Digital Library of Theses and Dissertations <http://ndltd.org>

New Zealand Ministry of Health <http://www.health.govt.nz>

New Zealand Social Policy Evaluation and Research Unit <http://www.superu.govt.nz>

NHS Sustainable Improvement Team (formerly Improving Quality) <http://www.nhsiq.nhs.uk/>

Nuffield Trust <http://www.nuffieldtrust.org.uk/>

Open Grey <http://opengrey.eu>

Primary Health Care Research and Information Service <http://www.phcris.org.au/researchevidence/>

Public Health Agency of Canada <http://www.phac-aspc.gc.ca/index-eng.php>

Robert Wood Johnson Foundation <http://www.rwjf.org/>

The Change Foundation <http://www.changefoundation.com/>

The Health Foundation <http://www.health.org.uk>

The Henry J. Kaiser Family Foundation <http://kff.org/>

The National Academies of Sciences Engineering Medicine, Health and Medicine Division  
<http://www.nationalacademies.org/hmd/>

The New York Academy of Medicine Grey Literature Report <http://www.greylit.org/>

Theses Canada <http://www.bac-lac.gc.ca/eng/services/theses/Pages/theses-canada.aspx>

US National Library of Medicine Health Services Research Projects in Progress  
[http://wwwcf.nlm.nih.gov/hsr\\_project/home\\_proj.cfm](http://wwwcf.nlm.nih.gov/hsr_project/home_proj.cfm)

World Health Organization Primary Health Care  
[http://www.who.int/topics/primary\\_health\\_care/en/](http://www.who.int/topics/primary_health_care/en/)
