# Supplementary material for: Patient navigators facilitating access to primary care: a scoping review
Source: PubMed Central journal article supplement — BMJ Open. 2018 Mar 17;8(3):e019252. doi: 10.1136/bmjopen-2017-019252 (PMC5875656; doi:10.1136/bmjopen-2017-019252), 2018-03-17
Supplement: bmjopen-2017-019252supp002.pdf [file bmjopen-2017-019252supp002.pdf]

## Supplementary File 2: Boolean search strategy

Database name and provider: OVID Medline

Search conducted by the first author on 27 April 2016

| <b>Search #</b> | <b>Search term (titles and abstracts, years searched 2000 – April 2016)</b> | <b>Hits</b> |
|-----------------|-----------------------------------------------------------------------------|-------------|
| 1               | Broker*                                                                     | 1010        |
| 2               | Health broker*                                                              | 7           |
| 3               | Health service* broker                                                      | 0           |
| 4               | Community health worker*                                                    | 2204        |
| 5               | Community navigat*                                                          | 18          |
| 6               | Peer navigat*                                                               | 27          |
| 7               | Patient navigat*                                                            | 463         |
| 8               | Lay health work*                                                            | 184         |
| 9               | Link* to care                                                               | 800         |
| 10              | Navigat*                                                                    | 21928       |
| 11              | 1 or 2 or 3 or 4 or 5 or 6 or 7 or 8 or 9 or 10                             | 26012       |
| 12              | Family practi*                                                              | 8493        |
| 13              | General practi*                                                             | 33546       |
| 14              | Primary care                                                                | 79085       |
| 15              | Primary health care                                                         | 15589       |
| 16              | Community health*                                                           | 16307       |

|    |                                                                                   |        |
|----|-----------------------------------------------------------------------------------|--------|
| 17 | 12 or 13 or 14 or 15 or 16                                                        | 139643 |
| 18 | 11 and 17                                                                         | 2742   |
| 19 | Limit 18 to (abstracts and English language and humans and yr="2000 –<br>Current" | 2194   |
